# Supplementary material for: Predicting risk of hospitalisation: a retrospective population-based analysis in a paediatric population in Emilia-Romagna, Italy
Source: PubMed Central journal article supplement — BMJ Open. 2018 May 5;8(5):e019454. doi: 10.1136/bmjopen-2017-019454 (PMC5942467; doi:10.1136/bmjopen-2017-019454), 2018-05-05
Supplement: bmjopen-2017-019454.draft_revisions.pdf [file bmjopen-2017-019454.draft_revisions.pdf]

# BMJ Open

BMJ Open is committed to open peer review. As part of this commitment we make the peer review history of every article we publish publicly available.

When an article is published we post the peer reviewers' comments and the authors' responses online. We also post the versions of the paper that were used during peer review. These are the versions that the peer review comments apply to.

The versions of the paper that follow are the versions that were submitted during the peer review process. They are not the versions of record or the final published versions. They should not be cited or distributed as the published version of this manuscript.

BMJ Open is an open access journal and the full, final, typeset and author-corrected version of record of the manuscript is available on our site with no access controls, subscription charges or pay-per-view fees (<http://bmjopen.bmj.com>).

If you have any questions on BMJ Open's open peer review process please email [info.bmjopen@bmj.com](mailto:info.bmjopen@bmj.com)

# BMJ Open

## Predicting Risk of Hospitalization in a Pediatric Population

|                                 |                                                                                                                                                                                                                                                                                                                                                                                                                                                                                                                                                                                                                                                                                                                                                                          |
|---------------------------------|--------------------------------------------------------------------------------------------------------------------------------------------------------------------------------------------------------------------------------------------------------------------------------------------------------------------------------------------------------------------------------------------------------------------------------------------------------------------------------------------------------------------------------------------------------------------------------------------------------------------------------------------------------------------------------------------------------------------------------------------------------------------------|
| Journal:                        | <i>BMJ Open</i>                                                                                                                                                                                                                                                                                                                                                                                                                                                                                                                                                                                                                                                                                                                                                          |
| Manuscript ID                   | bmjopen-2017-019454                                                                                                                                                                                                                                                                                                                                                                                                                                                                                                                                                                                                                                                                                                                                                      |
| Article Type:                   | Research                                                                                                                                                                                                                                                                                                                                                                                                                                                                                                                                                                                                                                                                                                                                                                 |
| Date Submitted by the Author:   | 04-Sep-2017                                                                                                                                                                                                                                                                                                                                                                                                                                                                                                                                                                                                                                                                                                                                                              |
| Complete List of Authors:       | Louis, Daniel; Jefferson Medical College, Callahan, Clara; Thomas Jefferson University, Center for Research in Medical Education and Health Care<br>Robeson, Mary; Jefferson Medical College, Center for Research in Medical Education and Health Care<br>Liu, Mengdan; Jefferson Medical College, Center for Research in Medical Education and Health Care<br>McRae, Jacquelyn; Thomas Jefferson University, College of Population Health<br>Gonnella, Joseph; Jefferson Medical College, Center for Research in Medical Education and Health Care<br>Lombardi, Marco; Parma Local Health Authority<br>maio, vittorio; Thomas Jefferson University, College of Population Health; Thomas Jefferson University, Center for Research in Medical Education and Health Care |
| <b>Primary Subject Heading</b>: | Health services research                                                                                                                                                                                                                                                                                                                                                                                                                                                                                                                                                                                                                                                                                                                                                 |
| Secondary Subject Heading:      | Paediatrics                                                                                                                                                                                                                                                                                                                                                                                                                                                                                                                                                                                                                                                                                                                                                              |
| Keywords:                       | Predictive Risk Modeling, Paediatric Population, Population-based Study                                                                                                                                                                                                                                                                                                                                                                                                                                                                                                                                                                                                                                                                                                  |
|                                 |                                                                                                                                                                                                                                                                                                                                                                                                                                                                                                                                                                                                                                                                                                                                                                          |

SCHOLARONE™  
Manuscripts

## Predicting Risk of Hospitalization in a Pediatric Population

Daniel Z Louis<sup>1</sup>, Clara A. Callahan, MD<sup>1</sup>, Mary Robeson<sup>1</sup>, Mengdan Liu<sup>1</sup>, Jacquelyn McRae,  
PharmD<sup>2</sup>, Joseph S. Gonnella, MD<sup>1</sup>, Marco Lombardi, MD<sup>3</sup>, Vittorio Maio, PharmD, MS,  
MSPH<sup>1,2</sup>

<sup>1</sup> Center for Medical Research in Medical Education and Health Care, Sidney Kimmel  
Medical College at Thomas Jefferson University, Philadelphia, USA

<sup>2</sup> Jefferson College of Population Health, Thomas Jefferson University, Philadelphia, USA

<sup>3</sup> Parma Local Health Authority, Parma, Emilia-Romagna, Italy

**Corresponding author:** Vittorio Maio, Jefferson College of Population Health, Thomas  
Jefferson University, 901 Walnut Street, 10th Floor, Philadelphia, PA 19107, Tel.215-955-  
1821, [vittorio.maio@jefferson.edu](mailto:vittorio.maio@jefferson.edu)

**Ethical approval:** This study was conducted under the auspices of regulation of privacy of the  
Emilia-Romagna Region N.3 of 24 April 2006 (title: Processing of sensitive data) of act N.1 of 30  
May 2014 still in force. In addition, this study was approved by the Institutional Review Board  
(IRB) of Thomas Jefferson University as an expedited retrospective database/record review. The  
IRB granted a waiver of informed consent.

**ABSTRACT** (294 words)

**Objectives** Develop predictive models for a pediatric population that provide information for pediatricians and health authorities to identify children at risk of hospitalisation for conditions that may be impacted through improved patient care.

**Design** Retrospective healthcare utilisation analysis with multivariate logistic regression models.

**Data** Demographic information linked with utilisation of health services in the years 2006–2014 was used to predict risk of hospitalisation or death in 2015 using a longitudinal administrative database of 527,458 children aged 1 to 13 residing in the Regione Emilia-Romagna (RER), Italy in 2014.

**Outcome measures** Models designed to predict risk of hospitalisation or death in 2015 for problems that are potentially avoidable were developed and evaluated using the C-statistic, for calibration to assess performance across levels of predicted risk, and in terms of their sensitivity, specificity and positive predictive value.

**Results** Of the 527,458 children residing in RER in 2014, 6,391 children (1.21%) were hospitalized for selected conditions or died in 2015. 49,486 children (9.4%) of the population were classified in the “At Higher Risk” group using a threshold of predicted risk >2.5%. The observed risk of hospitalization (5%) for the “At Higher Risk” group was more than 4 times higher than the overall population. We observed a C-statistic of 0.78 indicating good model performance. The model was well calibrated across categories of predicted risk.

**Conclusions** It is feasible to develop a population-based model using a longitudinal administrative database that identifies the risk of hospitalisation for a pediatric population.

1  
2  
3 The results of this model, along with profiles of children identified as high risk are being  
4  
5 provided to the pediatricians and other healthcare professionals providing care to this  
6  
7 population to aid in planning for care management and interventions that may reduce their  
8  
9 patients' likelihood of a preventable, high-cost hospitalisation.  
10  
11  
12  
13  
14  
15  
16

### 17 Strengths and limitations of this study

- 18 • This study included the entire pediatric population of the Emilia-Romagna Region of  
19 Italy, 527,458 children ages 1-13.
- 20 • The study used an existing longitudinal administrative healthcare database with  
21 both the advantage of much lower cost than new data collection and the  
22 disadvantage of gaps and potential errors in administrative data.
- 23 • The results of the study are being used to assist pediatricians and health authorities  
24 manage high risk children.  
25  
26  
27  
28  
29  
30  
31  
32  
33  
34  
35  
36  
37  
38  
39  
40  
41  
42  
43  
44  
45  
46  
47  
48  
49  
50  
51  
52  
53  
54  
55  
56  
57  
58  
59  
60

Review only

## INTRODUCTION

Healthcare systems have been moving from a passive approach of waiting for and reacting to patients' problems to a more active model that includes identification of patients at risk, taking the initiative in offering care and actively seeking to avoid recurrence or progression of medical problems. With the aging of populations worldwide, and high prevalence of chronic diseases, it is not surprising that these efforts have often focused on the elderly. Less attention has been paid to the pediatric population. However, despite the relatively low prevalence of chronic disease in children, there is evidence that children experience preventable hospitalizations. (1) For example, a study of pediatric inpatient claims in the United States estimated that pediatric "ambulatory care sensitive" conditions accounted for \$4.05 billion (USD) in hospital charges and over 1 million hospitalization days in a one year period. (2)

Predictive risk modeling is a tool that can be used to estimate the risk of an outcome within the context of pre-specified variables and uncertainty. Predictive risk modeling may offer an opportunity to better understand individuals who may be at higher risk for an undesirable outcome. (3) A number of predictive risk modeling studies have been conducted in pediatrics; however, many of these studies have focused on children with specific medical problems or use data that is not routinely available in administrative databases. (4)·(5)·(6)·(7)·(8)·(9)

1  
2  
3 Under the auspices of the Italian National Health Service (NHS), the 21 regional  
4 governments are responsible for delivering health care through a network of  
5  
6 geographically defined Local Health Authorities. Primary care physicians, including  
7  
8 pediatricians, work for the Local Health Authorities as independent contractors. Every  
9  
10 Italian is expected to enroll with a primary care physician (a pediatrician for those under  
11  
12 age 14) who serve as the ‘gatekeepers’ for delivering primary care and coordinating  
13  
14 specialty services for their enrolled patients. (10) This focus on primary care is ideal for  
15  
16 the development and implementation of a proactive model of health care.  
17  
18  
19  
20  
21  
22

23 To further encourage coordinated care, the Regione Emilia-Romagna (RER) has  
24  
25 established Patient-Centered Medical Homes. The identification of patients who would  
26  
27 most benefit from outreach efforts is fundamental to achieving the goals of promoting  
28  
29 population health and practicing proactive medicine. The RER has therefore developed  
30  
31 and implemented a population-based model to predict risk of hospitalization or death for  
32  
33 adult residents in the region. (11) The results of the model are presented to physicians in  
34  
35 Patient-Centered Medical Homes as patient profiles to support care management and the  
36  
37 identification of patients who may benefit from additional outreach such as home health  
38  
39 care, disease management, or case management.  
40  
41  
42  
43  
44

45 Current risk models used in RER focus on the adult population. This paper describes  
46  
47 the development of predictive risk models for the pediatric population using the RER’s  
48  
49 regional longitudinal administrative healthcare database to help identify children who are  
50  
51 at risk of hospitalization for conditions that may be affected through improved patient care.  
52  
53  
54  
55  
56  
57  
58  
59  
60

## METHODS

### Data Source

The RER is a region of northern Italy that lies between the River Po and Apennine Mountains with approximately 4.5 million inhabitants. RER maintains a longitudinal healthcare database for all its residents. The RER database contains patient-level demographic data (age, gender, birth and death dates, location of residence, primary care physician/pediatrician) and utilization data for inpatient (hospital discharge abstract data with ICD-9-CM diagnosis and procedure codes, and admission/discharge dates), outpatient (laboratory, diagnoses, and physician services, pharmacy claims including WHO ATC/DDD system codes), (12). specialty (therapeutic procedures, rehabilitation, and specialist visits), and emergency room visits. Inpatient medications are not captured. Patients with disabilities or low family income are eligible for exemption of service copayment for specialty visits and outpatient prescriptions, which provide some socioeconomic information. Each resident is assigned an anonymous identifier so that utilization can be tracked over time while maintaining patient privacy. (13)

### Study Cohort

In Italy, children age 14 years old are required to switch from a pediatrician to a primary care physician; therefore, we limited the study population to children 1-13 years old on December 31<sup>st</sup>, 2014. The study population also was narrowed to whom met the following criteria: (i) resident of the RER for the entire year 2014, (ii) have valid



1  
2  
3 information on age, gender, local health authority, district or geographic location in 2014,  
4  
5 (iii) alive at the beginning of 2015. The study population was stratified into three age  
6  
7 groups: 1-2 years old (on December 31, 2014); 3-5 years old; 6-13 years old. Children less  
8  
9 than one year old on December 31, 2014 were not included in the study population due to  
10  
11 insufficient data for prediction of outcomes.  
12  
13  
14  
15  
16  
17

### 18 **Dependent Variable**

19  
20  
21 The outcome was defined as the occurrence of hospitalization that could have  
22  
23 potentially been prevented or delayed with appropriate patient care or death by any cause.  
24  
25 (11) We developed a list of hospitalizations that are potentially preventable with  
26  
27 appropriate patient care using a three step process. First, we conducted a literature search  
28  
29 to evaluate pediatric studies that defined potentially avoidable disease in pediatrics that  
30  
31 could require hospitalization. (14), (15), (16) We began with the listing of ICD-9-CM codes  
32  
33 for “pediatric ambulatory care sensitive conditions” identified in Shi et al. (15) All  
34  
35 hospitalizations in 2013 of children in the target age groups were classified using both ICD-  
36  
37 9-CM codes and Disease Staging categories. (17), (18) The results were reviewed by the  
38  
39 authors of this paper and compared to the Shi et al list. A number of changes were made  
40  
41 for this project. For example, the list of immunization preventable conditions to be  
42  
43 included in the dependent variable was expanded to include currently available vaccines.  
44  
45 We included additional conditions, such as acute cystitis (ICD-9-CM code of 595.0) and  
46  
47 hypoglycemic coma (ICD-9-CM code of 251.0). Advanced stages of selected medical  
48  
49 problems were added where Stage 1 may not be avoidable but advanced stages can  
50  
51  
52  
53  
54  
55  
56  
57  
58  
59  
60

1  
2  
3 potentially be delayed or prevented through timely intervention, e.g. Stage 2 or 3  
4  
5 appendicitis, Stage 2 or 3 sinusitis. While certainly not always preventable, we believed  
6  
7 that inclusion of hospitalizations for certain types of trauma and toxicities (e.g.,  
8  
9 acetaminophen toxicity, adverse drug reactions, burns) was appropriate especially for a  
10  
11 pediatric population. These changes are summarized in Appendix, Table 1.  
12  
13

14  
15 Finally, we used disease staging categories for inclusion of relevant hospitalizations  
16  
17 that would have been missed using solely primary ICD-9-CM codes. For example, if a child  
18  
19 was hospitalized with a primary diagnosis of respiratory failure with asthma (ICD-9-CM  
20  
21 code of 493) as the secondary diagnosis, then the disease staging category of Asthma would  
22  
23 include that admission that might have been missed by including only primary ICD-9-CM  
24  
25 codes. This is summarized in Appendix, Table 2.  
26  
27

28  
29 Children hospitalized for these selected conditions or who died from any cause in  
30  
31 2015 were counted as being positive for the outcome.  
32  
33

### 34 35 36 37 **Independent Variables**

38  
39 A list of predictor variables was developed utilizing the RER administrative data  
40  
41 from 2006-2014. Independent variables included information such as: demographics,  
42  
43 socioeconomic factors, diseases/conditions grouped by etiology or body systems, mother's  
44  
45 medical history and pregnancy/birthing information, emergency-room visits, potentially  
46  
47 inappropriate prescriptions and antibiotic usage.  
48  
49

50  
51 Demographic variables included: age on December 31st, 2014, gender, and  
52  
53 citizenship (Italian or non-Italian). Children from low-income families or with disabilities  
54  
55  
56  
57  
58  
59

1  
2  
3 are exempt from copayments for prescriptions and specialty visits. This information was  
4  
5 used as a potential predictor variable.  
6  
7

8 We mapped diseases defined primarily by the affected body system with the  
9  
10 exceptions of cancer, genetic conditions, and trauma which were based on etiology (Louis,  
11  
12 2014) using 2014 hospital discharge data, outpatient prescription information, and  
13  
14 specialty visit claims. A total of 24 groups were defined. Disease Staging diagnostic  
15  
16 categories was used to map hospital admissions to the 24 body system/etiology groups.  
17  
18 (17) (see first column of Table 1) Patients with cardiovascular diseases, chronic  
19  
20 respiratory diseases, diabetes mellitus, epilepsy, and disorders of the thyroid were  
21  
22 identified using the Anatomical Therapeutic Chemical (ATC) Classification System codes  
23  
24 from outpatient prescriptions. (19) Specialty visit records were also used for identifying  
25  
26 medical conditions of some body systems. For example, if a child was admitted to the  
27  
28 hospital for type 1 diabetes mellitus, or visited an endocrinologist, or had filled a  
29  
30 prescription for insulin injection(s) (ATC code of A10AB), this patient would be identified  
31  
32 as having an endocrine diagnosis in 2014.  
33  
34  
35  
36  
37

38 Severity level codes (critical (C), acute (A), urgent but deferred (U), and not urgent  
39  
40 (N)) are assigned to individuals upon discharge from the emergency department. We  
41  
42 excluded ER visits that resulted in a hospital admission because diagnosis information was  
43  
44 captured by hospital discharge data with more accurate information. We believe more  
45  
46 frequent or severe ER visits may indicate a poor outcome, therefore, number of emergency  
47  
48 room visits by severity level was calculated for each patient.  
49  
50  
51

52 There is evidence that the risks outweigh the benefits for certain medication usage  
53  
54 in the pediatric population. (20) For example, certain mood-altering medications such as,  
55  
56  
57  
58  
59

1  
2  
3 citalopram, sertraline, fluvoxamine, and any tricyclic antidepressants are not  
4 recommended in children of any age. Some medications can be harmful within specified  
5 ages. For example, loperamide is not indicated for children under three years old. For  
6 children who filled an outpatient prescription in 2014, we calculated their age at  
7 dispensation date and amount of medications they had filled, in order to identify patients  
8 with potentially inappropriate prescriptions in 2014. The number of antibiotic  
9 prescriptions utilized in 2014 was estimated since high utilization of antibiotics has been  
10 linked to decreased gut microflora, decreased immune function, and resistant strains of  
11 bacteria. (21)

12  
13  
14  
15  
16  
17  
18  
19  
20  
21  
22  
23  
24 For children ages 1-5 the models considered problems identified at birth as  
25 potential predictors using hospital discharge abstract data. About 86% of the newborns  
26 were healthy, with no serious medical problems noted on their birth records. Infants with  
27 diagnostic categories of premature birth with low birth weight, full-term infants with  
28 abnormal birth weight, premature with very low birth weight, or extremely low birth  
29 weight, were classified as abnormal birth weight; all other conditions were considered as a  
30 group. The mothers' delivery information, such as age at delivery, C-section, and parity,  
31 were identified based on the mothers' hospitalization records, and linked to children.  
32 Information about deliveries that occurred outside hospitals could not be captured.

33  
34  
35  
36  
37  
38  
39  
40  
41  
42  
43  
44  
45 Children ages 1-5 years old were also linked with information regarding their  
46 mothers' medical history and drug use during pregnancy. There is evidence on the  
47 association between pre-natal (up-to 270 days before delivery) exposure to antibiotics and  
48 the development of asthma. (22) We estimated the total exposure to any antibiotics during  
49 the pre-natal period using the mother outpatient prescription claims. We included two  
50  
51  
52  
53  
54  
55  
56  
57  
58  
59  
60

1  
2  
3 categories of mother's potentially inappropriate drug use, class D (potential risks outweigh  
4 the benefits) and X (contraindicated during pregnancy), since these drugs may be linked to  
5 harm to children. Mothers' 3 year medical history before delivery was retrieved for  
6 identifying certain conditions such as abortion, diabetes and psychological condition. For  
7 about 22% of children we were not able to establish the mother-baby linkage.  
8  
9

10 We developed history variables with up to five years of data (pharmacy, specialty,  
11 hospital admission, and emergency room visit) for children in age strata 3-5 years old and  
12 6-13 years old. Children who had conditions in any year from 2009 to 2013 were flagged as  
13 having a utilization history.  
14

## 15 **Modeling**

16  
17  
18  
19  
20  
21  
22  
23  
24  
25  
26  
27  
28  
29  
30  
31  
32  
33  
34  
35  
36  
37  
38  
39  
40  
41  
42  
43  
44  
45  
46  
47  
48  
49  
50  
51  
52  
53  
54  
55  
56  
57  
58  
59  
60

Logistic regressions were used to estimate predicted probability for the occurrence of an inpatient hospital stay for the selected conditions, or death from any cause, for the individual patients. Since age and gender may be strongly correlated with children's' risk, we fit a total of six multivariate logistic regression models: female and male by age groups (1-2, 3-5, and 6-13 years old). All models were developed using SAS 9.3 statistical software (SAS Institute, Cary, NC, U.S.A.).

## 61 **Model Validation**

62  
63  
64  
65  
66  
67  
68  
69  
70  
71  
72  
73  
74  
75  
76  
77  
78  
79  
80  
81  
82  
83  
84  
85  
86  
87  
88  
89  
90  
91  
92  
93  
94  
95  
96  
97  
98  
99  
100

The predicted accuracy of the modeling was evaluated using C-statistics (the area under the receiver operating characteristics curve), comparing the results of the 'predicted' to the 'observed' outcomes in 2015. We stratified patients into risk strata based on the predicted risk of hospitalization or death. "At higher risk" was defined as children with a

1  
2  
3 predicted risk greater than 2.5%. “Higher than average” was defined as children with a  
4  
5 predicted risk of hospitalization or death between the mean rate and 2.5%. The rest of  
6  
7 population was grouped into “Lower than average”. Calibration of the model across these  
8  
9 risk groups was assessed by comparing observed to predicted rates among the risk groups.  
10  
11 We also report the sensitivity, specificity and positive predictive value (PPV) for the  
12  
13 defined risk group cutoffs.  
14  
15  
16  
17  
18  
19  
20  
21

## 22 **RESULTS**

### 23 **Characterization of Risk Groups**

24  
25 A total of 527,458 children resided in RER in 2014; of those, 6,391 children (1.21%)  
26  
27 were hospitalized for selected conditions or died in 2015. Table 1 displays the distribution  
28  
29 of gender, age category, presence of selected chronic conditions, ER visits, selected  
30  
31 prescription drug usage, co-pay exemption for income or disability and specialty visits for  
32  
33 the eligible RER residents as of December 31 2014.  
34  
35  
36  
37  
38  
39

40 Table 1 also compares the characteristics of the total selected pediatric population to  
41  
42 the subgroups of the population classified by risk categories based on the model results.  
43  
44 Forty nine thousand four hundred and eighty-six children (9.4%) of the population were  
45  
46 classified in the “At Higher Risk” group using a threshold of predicted risk >2.5%. The  
47  
48 children predicted to be At Higher Risk were more likely to be male (58.9%) compared to  
49  
50 51.5% in the total population. The two youngest age strata (1-2 and 3-5 years) had much  
51  
52 higher proportions of children identified in the At Higher Risk group than the 6-13 year old  
53  
54  
55  
56  
57  
58  
59  
60

1  
2  
3 children. For example, 18,112 (23%) of the children age 1-2 years were identified in the At  
4  
5 Higher Risk Group. This age category includes 36% of the At Higher Risk children although  
6  
7 it represents 15% of the total pediatric population. Children in the “At Higher Risk”  
8  
9 category were more likely to have each of the selected conditions. When looking at the  
10  
11 highest prevalence conditions, 43.8% of children in the “At Higher Risk” category had an  
12  
13 ear, nose, or throat problem, compared to 6.1% in the overall population; 5.5% had a  
14  
15 gastrointestinal problem compared to 1.4% in the overall population; 4.3% had a  
16  
17 neurological problem compared to 0.7% in the overall population; 14.7% had a respiratory  
18  
19 problem compared to 3.9% in the overall population; and 11.7% had a skin problem  
20  
21 compared to 7.5% in the overall population.  
22  
23  
24  
25  
26

27  
28 Children identified as being “At Higher Risk” were much more likely to have a history  
29  
30 of emergency room visits and were more likely to have a history of 2, 3, or more antibiotic  
31  
32 prescriptions. Overall, 14.6% of children had 3 or more antibiotic prescriptions; in the “At  
33  
34 Higher Risk” category 51.7% had a history of 3 or more antibiotic prescriptions. Children  
35  
36 with exemptions from co-payments due to either family income or disability were more  
37  
38 likely to be identified as being At Higher Risk as were children with a history of medical or  
39  
40 surgical specialty visits.  
41  
42  
43  
44

45 Table 2 displays information about the delivery (for the children age 1-5) and medical  
46  
47 history of the mother for those children where we were able to match to their mother’s  
48  
49 record. First children, children who were delivered by caesarean section and children  
50  
51 where an abnormal birth weight or other problems were noted at birth were more likely to  
52  
53 be classified in the “At Higher Risk” category. If the mother was prescribed a potentially  
54  
55  
56  
57  
58  
59  
60

1  
2  
3 inappropriate drug or an antibiotic during pregnancy, the child was more likely to be  
4  
5 classified in the “At Higher Risk” category. When examining a 3 year medical history of the  
6  
7 mother, the mother’s asthma, cardiovascular disease, diabetes mellitus, or mental health  
8  
9 problems, or the record of a previous abortion, were all relatively frequent and more  
10  
11 prevalent in the mothers of children predicted to be in the “At Higher Risk” category.  
12  
13  
14  
15  
16  
17  
18

## 19 **Calibration**

20  
21  
22 The population was divided into three risk groups based on predicted probability of  
23  
24 hospitalization as defined above. We observed good calibration; each stratum’s predicted  
25  
26 risks were similar to observed prevalence of hospitalizations or deaths. (Figure 1)  
27  
28 Individuals, who fell in the “At Higher Risk” group, with predicted risk greater than 2.5%,  
29  
30 had 2,683 predicted events based on the model results, and 2,737 observed events. While  
31  
32 the overall rate of hospitalization or death for children ages 1-13 was 1.21% the predicted  
33  
34 and observed risk of the “At Higher Risk” group was over 5%.  
35  
36  
37  
38  
39  
40  
41  
42

## 43 **Model Performance among Risk Groups**

44  
45 We observed a c-statistic of 0.78 indicating good model performance (Table 3). The  
46  
47 sensitivity (proportion predicted to be At Higher Risk of those who had an event in 2015)  
48  
49 was 0.43 and 0.70 for predicted risk categories of “at higher risk” and “higher than  
50  
51 average”, respectively. In other words, among those whom were hospitalized or deceased  
52  
53 in 2015, 43% were predicted to have risk greater than 2.5% of hospitalization or death,  
54  
55  
56  
57  
58  
59  
60



1  
2  
3 and 70% have risk higher than average. The specificity (proportion predicted to be at a  
4  
5 “lower” risk of those who did not have an event) was 0.91 and 0.72 for the predicted  
6  
7 ‘higher’ and “higher than average” risk categories; among those who were not hospitalized  
8  
9 and did not die in 2015, 91% were not predicted to be “at higher risk”. The positive  
10  
11 predictive value (proportion with an event of those who were predicted to be at an  
12  
13 elevated risk) was 0.06 and 0.03 for the “higher” and “higher than average” predicted risk  
14  
15 categories. In other words, of those individuals who were estimated to have a >2.5% risk  
16  
17 of hospitalization or death approximately 6% had an event in 2015.  
18  
19  
20  
21  
22  
23

## 24 **DISCUSSION**

25  
26 We have developed a population-based model that identifies risk of hospitalization  
27  
28 for potentially preventable problems in a pediatric population including all children under  
29  
30 the age of 14 living in the RER of Italy. The C-statistic of 0.78 indicates that the model  
31  
32 performs well. By comparison, in a study predicting high-cost pediatric patients, Leininger  
33  
34 et al reported a C-statistic of 0.73. (9)  
35  
36  
37  
38

39 We believe that the definition of the dependent variable used in our models  
40  
41 increases the likelihood that they are identifying patients whose risk may be reduced  
42  
43 through proactive care. We have updated previously published criteria to include  
44  
45 hospitalizations that may have been prevented by currently available vaccines. And we  
46  
47 have used the logic of disease staging to include relevant hospitalizations that would have  
48  
49 been missed using solely primary ICD-9-CM codes. Specifics of the selection criteria are  
50  
51 available in the supplemental material.  
52  
53  
54  
55  
56  
57  
58  
59  
60

1  
2  
3 The richness of the administrative data available in the RER allowed for a robust  
4 definition of the predictive variables. The RER data allow for the linkage of patients' use of  
5 diverse in and out-patient health care services over multiple years. In addition, the ability  
6 to link child and mother's information allows the models to consider some of the mother's  
7 medical history such as the presence of chronic disease and use of prescription drugs in the  
8 years prior to birth as well as complications that may have arisen at birth.  
9

10  
11  
12  
13  
14  
15  
16  
17  
18 There are limitations to our models. The models were developed with  
19 administrative data which lack some of the clinical specificity which would be useful in  
20 assessing patient risk. Children who have not had the types of encounters included in the  
21 RER database would have potentially missing information. The RER database does not  
22 have encounter level diagnostic data available documenting visits with the primary care  
23 pediatrician. The administrative data have very limited information available about the  
24 patient and family socio economic status. Our models use prior utilization among the  
25 predictor variables. With the administrative data, we cannot distinguish appropriate from  
26 inappropriate prior utilization which may bias our results. Despite their limitations  
27 administrative data have many advantages for a project such as ours. They are relatively  
28 inexpensive to analyze and in the case of the RER include a large population over multiple  
29 years.  
30  
31  
32  
33  
34  
35  
36  
37  
38  
39  
40  
41  
42  
43  
44  
45  
46

47 While the evidence was mixed, a systematic review suggests that hospitalizations  
48 can be prevented in children with medical complexity. (1) The Local Health Authority of  
49 Parma has begun working with the primary care pediatricians caring for the patients  
50 identified by the models to develop individual "profiles" of children identified as being at  
51  
52  
53  
54  
55  
56  
57  
58  
59  
60

1  
2  
3 higher risk. Data in the profiles, along with the more detailed information available in the  
4  
5 medical record, can be used by the pediatricians to assess what additional intervention, if  
6  
7 any, may help to manage the child's risk. For example, review of the profiles of higher risk  
8  
9 children can help identify children whose parents might be contacted for a visit if they have  
10  
11 not been seen recently. Summaries of prescriptions that have been filled from the profiles  
12  
13 can be reviewed for potential over use, under use, or inappropriate use of medication. High  
14  
15 risk children with chronic illness might be referred to a specialist or home health care  
16  
17 provided.  
18  
19  
20  
21

22  
23 The RER healthcare system offers several advantages in the goal of reducing  
24  
25 potentially preventable hospitalization. Every child is enrolled with a primary care  
26  
27 pediatrician. The population is quite stable allowing for continuity of care. Through the  
28  
29 Italian National Health Service every child is entitled to health care with little or no cost at  
30  
31 the point of service. While the primary care pediatricians are paid on a per capita basis the  
32  
33 RER can negotiate incentive payments and monitor improvements in care that may help to  
34  
35 reduce avoidable hospitalizations. If successful, the results of the models can be applied by  
36  
37 other Local Health Authorities in the Regione Emilia-Romagna, other Italian regions, and  
38  
39 other countries with similar data availability.  
40  
41  
42  
43  
44  
45  
46  
47  
48  
49  
50  
51  
52  
53  
54  
55  
56  
57  
58  
59  
60

1  
2  
3 **Contributors:** DZL, VM, ML, and JSG were responsible for the conceptualization of this  
4 project. MR and ML were responsible for creation of the datasets used in this project. DZL,  
5 CAC, VM, MR, and JSG were responsible for the definition of analytical variables. MR and ML  
6 were responsible for modeling and statistical analysis. DZL managed the research team. CAC,  
7 VM, ML, and JSG advised on the analyses and results. All authors contributed to the  
8 preparation of the manuscript.  
9  
10  
11  
12  
13  
14  
15

16  
17 **Competing interests:** DZL and JSG declare personal fees from Truven Health Analytics. CAC,  
18 MR, ML, JM, ML, and VM declare no conflict of interests.  
19  
20  
21  
22

23 **Funding:** This research was funded by the Local Health Authority of Parma, Italy.  
24  
25

26 **Data:** Data used for this research were retrieved from the Regional database of the Emilia-  
27 Romagna Region provided through a collaborative agreement between the Regional Health Care  
28 and Social Agency, Emilia-Romagna, Italy, the Health Care Authority, Emilia-Romagna, Italy,  
29 and Thomas Jefferson University.  
30  
31  
32  
33  
34  
35

36 **Data Sharing:** No additional data available.  
37  
38

39 **Acknowledgments:** We thank Elena Saccenti, JD, Massimo Fabi, MD, and Ettore Brianti, MD,  
40 from the Local Health Authority, Parma, Italy, for their assistance; and Claudio Cantadori, MD,  
41 Sergio Capobianco, MD, Ada Donadio, MD, Maura Morelli, MD, and Michael Andreas Ramon  
42 Werth, MD, for their contribution in reviewing early results of our models.  
43  
44  
45  
46  
47  
48  
49  
50  
51  
52  
53  
54  
55  
56  
57  
58  
59  
60

1. Coller RJ, Nelson BB, Sklansky DJ, Saenz AA, Klitzner TS, Lerner CF, et al. Preventing Hospitalizations in Children with Medical Complexity: A Systematic Review. *Pediatrics*. 2014; 134(6).
2. Lu S, Kuo D. Hospital Charges of Potentially Preventable Pediatric Hospitalizations. *Acad Pediatr*. 2012; 12(5): p. 436-44.
3. Waljee A, Higgins P, Singal A. A Primer on Predictive Models. *Clinical and Translational Gastroenterology*. 2013; 44(4): p. e44.
4. Huang L, Li S, He D, Weiqun B, Li L. A predictive risk model for medical intractability in epilepsy. *Epilepsy and Behavior*. 2014; 37: p. 282-86.
5. Cerqueira DC, Soares CM, Silva VR, Magalhaes JO, Barcelona IP, Duarte MG, et al. A Predictive Model of Progression of CKD to ESRD in a Predialysis Pediatric Interdisciplinary Program. *Clin J Am Soc Nephrol*. 2014; 9(4): p. 728-35.
6. Lopes J, Goulart E, Siqueira A, Fonseca I, de Brito M, Starling C. Nosocomial Infections in Brazilian Pediatric Patients: Using a Decision Tree to Identify High Mortality Groups. *Brazilian Journal of Infectious Diseases*. 2009 Apr; 13: p. 2.
7. Gorelick M, Scribano P, Stevens M, Schultz T, Shults J. Predicting Need for Hospitalization in Acute Pediatric Asthma. *Pediatric Emergency Care*. 2008; 24(11): p. 735-43.
8. McAna J, Crawford AG, Novinger BW, Sidorov J, Din FM, Maio V, et al. A predictive model of hospitalization risk among disabled medical enrollees. *The American Journal of Managed Care*. 2013; 19(5): p. e166-74.
9. Leininger L, Saloner B, Wherry L. Predicting High-cost Pediatric Patients. *Medical Care*. 2015 August; 53(8): p. 729-735.
10. Lo Scalzo L, Donatini A, Orzella L, Cicchetti A, Profili S, Maresso A. Italy: Health System Review. Copenhagen: World Health Organization; 2009. Report No.: Volume 11, No. 6.
11. Louis D, Robeson M, McAna J, Maio V, Keith S, Liu M, et al. Predicting risk of hospitalisation or death: a retrospective population-based analysis. *BMJ open*. 2014; 4(9): p. e005223.
12. WHO Collaborating Centre for Drug Statistics Methodology. Guidelines for ATC classification and DDD assignment 2013 Oslo; 2012.
13. The Emilia-Romagna Regional Health Service and the new welfare system: Facilities, expenditure, and activities as of 31.12.2010. Programs, agreements and organisational models. Bologna: Regione Emilia-Romagna Assessorato Politiche per la Salute; 2012.
14. Flores G, Abreu M, Chaisson C, Sun D. Keeping Children Out of Hospitals: Parents' and physicians' perspectives on how pediatric hospitalizations for ambulatory care-sensitive conditions can be avoided. *Pediatrics*. 2003; 112(5): p. 1021-1030.
15. Shi L, Lu N. Individual Sociodemographic Characteristics Associated with Hospitalization for Pediatric Ambulatory Care Sensitive Conditions. *Journal of Health Care for the Poor and Underserved*. 2000 November; 11(4): p. 373-384.
16. Pediatric Quality Measures Program. Content last reviewed July 2016. Agency for Healthcare Research and Quality, Rockville, MD. <http://www.ahrq.gov/policymakers/chipra/factsheets/fullreports/index.html>. [Online].
17. Gonnella JS, Hornbrook MC, Louis DZ. Staging of Disease A Case-Mix Measurement. *JAMA*. 1984; 251(5): p. 637-644.

18. Gonnella JS, Louis DZ, Gozum MV, Callahan CA, Barnes CA, editors. Disease Staging Clinical and Coded Criteria. 629th ed. Ann Arbor: Truven Health Analytics; 2012.
19. Maio V, Yuen EJ, Rabinowitz C, Jimbo M, Donatini A, Mall S, et al. Using pharmacy data to identify those with chronic conditions in Emilia-Romagna, Italy. *Journal of Health Services Research and Quality*. 2005; 10(4): p. 232-238.
20. Prot-Labarthe S, Weil T, Angoulvant F, Boulkedid R, Alberti C. POPI (Pediatrics: Omission of Prescriptions and Inappropriate Prescriptions): Development of a Tool to Identify Inappropriate Prescribing. *PLoS ONE*. 2014; 9(6): p. e101171.
21. Costelloe C, Metcalfe C, Lovering A, Mant D, Hay A. Effect of antibiotic prescribing in primary care on antimicrobial resistance in individual patients: systematic review and meta-analysis. *BMJ*. 2010; 340: p. c2096.
22. Metsala J, Lundqvist L, Virta L, Kaila M, Gissler M, Virtanen S. Prenatal and post-natal exposure to antibiotics and risk of asthma in childhood. *Clinical & Experimental Allergy*. 2014; 45: p. 137-145.
23. Thukral A, Lodha R, Irshad M, Arora N. Performance of Pediatric Risk Mortality (PRISM), Pediatric Index of Mortality (PIM), and PIM2 in a pediatric ICU in a developing country. *Pediatr Crit Care Med*. 2006; 7(4): p. 356-60.
24. Pollack MM, Patel KM, Ruttimann UE. PRISM III: An updated pediatric risk of mortality score. *Critical Care Medicine*. 1996 May; 24(5): p. 743-752.
25. MW S, Rutherford MK. The high concentration of U.S. health care expenditures. Rockville, MD: Agency for Healthcare Research and Quality; 2005. Report No.: Research in Action Issue 19. AHRQ. Pub. No. 06-0060.
26. Langham M, Walter A, Boswell T, Beck R, Jones T. Identifying children at risk of death within 30 days of surgery at an NSQIP pediatric hospital. *Surgery*. 2015 Dec; 158(6): p. 1481-91.

**Table 1: Study Population 2014**

|                                          | Total Population |       | At Higher Risk |       | Higher than average |       | Lower than average |       |
|------------------------------------------|------------------|-------|----------------|-------|---------------------|-------|--------------------|-------|
|                                          |                  |       | Risk >2.5%     |       | Risk 1.2-2.5%       |       | Risk <1.2%         |       |
|                                          | 527,458          |       | 49,486         |       | 99,714              |       | 378,258            |       |
|                                          | Number           | %     | Number         | %     | Number              | %     | Number             | %     |
| <b>Gender</b>                            |                  |       |                |       |                     |       |                    |       |
| Female                                   | 255,875          | 48.5% | 20,315         | 41.1% | 43,030              | 43.2% | 192,530            | 50.9% |
| Male                                     | 271,583          | 51.5% | 29,171         | 58.9% | 56,684              | 56.8% | 185,728            | 49.1% |
| <b>Age Group</b>                         |                  |       |                |       |                     |       |                    |       |
| 1 to 2 years                             | 78,051           | 14.8% | 18,112         | 36.6% | 44,084              | 44.2% | 15,855             | 4.2%  |
| 3 to 5 years                             | 125,459          | 23.8% | 20,180         | 40.8% | 35,543              | 35.6% | 69,736             | 18.4% |
| 6 to 13 years                            | 323,948          | 61.4% | 11,194         | 22.6% | 20,087              | 20.1% | 292,667            | 77.4% |
| <b>Selected condition/body system</b>    |                  |       |                |       |                     |       |                    |       |
| Cancer                                   | 1,138            | 0.2%  | 477            | 1.0%  | 252                 | 0.3%  | 409                | 0.1%  |
| Cardiovascular                           | 1,624            | 0.3%  | 653            | 1.3%  | 211                 | 0.2%  | 760                | 0.2%  |
| Dental Conditions                        | 442              | 0.1%  | 138            | 0.3%  | 109                 | 0.1%  | 195                | 0.1%  |
| Endocrine                                | 6,458            | 1.2%  | 1,276          | 2.6%  | 1,074               | 1.1%  | 4,108              | 1.1%  |
| Ear, Nose, Throat                        | 31,919           | 6.1%  | 21,664         | 43.8% | 7,376               | 7.4%  | 2,879              | 0.8%  |
| Eye                                      | 821              | 0.2%  | 165            | 0.3%  | 145                 | 0.1%  | 511                | 0.1%  |
| Genetic Conditions                       | 274              | 0.1%  | 188            | 0.4%  | 29                  | 0.0%  | 57                 | 0.0%  |
| Gastrointestinal                         | 7,380            | 1.4%  | 2,724          | 5.5%  | 1,578               | 1.6%  | 3,078              | 0.8%  |
| Genitourinary                            | 3,389            | 0.6%  | 987            | 2.0%  | 836                 | 0.8%  | 1,566              | 0.4%  |
| OB/GYN                                   | 128              | 0.0%  | 17             | 0.0%  | 19                  | 0.0%  | 92                 | 0.0%  |
| Hematological                            | 1,114            | 0.2%  | 596            | 1.2%  | 247                 | 0.2%  | 271                | 0.1%  |
| Hepatobiliary                            | 245              | 0.0%  | 82             | 0.2%  | 39                  | 0.0%  | 124                | 0.0%  |
| Immunologic Disease                      | 199              | 0.0%  | 80             | 0.2%  | 45                  | 0.0%  | 74                 | 0.0%  |
| Infectious Disease                       | 869              | 0.2%  | 596            | 1.2%  | 160                 | 0.2%  | 113                | 0.0%  |
| Male Genital                             | 1,329            | 0.3%  | 179            | 0.4%  | 209                 | 0.2%  | 941                | 0.2%  |
| Musculoskeletal                          | 3,817            | 0.7%  | 664            | 1.3%  | 453                 | 0.5%  | 2,700              | 0.7%  |
| Neurologic Diseases                      | 3,738            | 0.7%  | 2,123          | 4.3%  | 912                 | 0.9%  | 703                | 0.2%  |
| Nutrition                                | 924              | 0.2%  | 446            | 0.9%  | 201                 | 0.2%  | 277                | 0.1%  |
| Other Conditions                         | 1,703            | 0.3%  | 1,150          | 2.3%  | 247                 | 0.2%  | 306                | 0.1%  |
| Neonatal Conditions                      | 186              | 0.0%  | 111            | 0.2%  | 50                  | 0.1%  | 25                 | 0.0%  |
| Psychological                            | 854              | 0.2%  | 388            | 0.8%  | 141                 | 0.1%  | 325                | 0.1%  |
| Respiratory                              | 20,450           | 3.9%  | 7,285          | 14.7% | 5,886               | 5.9%  | 7,279              | 1.9%  |
| Skin                                     | 39,344           | 7.5%  | 5,809          | 11.7% | 7,461               | 7.5%  | 26,074             | 6.9%  |
| Trauma                                   | 737              | 0.1%  | 177            | 0.4%  | 167                 | 0.2%  | 393                | 0.1%  |
| <b>ER visits based on severity level</b> |                  |       |                |       |                     |       |                    |       |
| Critical                                 | 182              | 0.0%  | 117            | 0.2%  | 35                  | 0.0%  | 30                 | 0.0%  |

|                                                                |         |       |        |       |        |       |         |       |
|----------------------------------------------------------------|---------|-------|--------|-------|--------|-------|---------|-------|
| Acute                                                          | 15,029  | 2.8%  | 5,219  | 10.5% | 3,915  | 3.9%  | 5,895   | 1.6%  |
| Urgent but could be deferred                                   | 118,372 | 22.4% | 26,945 | 54.5% | 33,241 | 33.3% | 58,186  | 15.4% |
| Not Urgent                                                     | 45,336  | 8.6%  | 11,216 | 22.7% | 13,080 | 13.1% | 21,040  | 5.6%  |
| <b>Inappropriate Rx*</b>                                       | 8,077   | 1.5%  | 2,376  | 4.8%  | 3,090  | 3.1%  | 2,611   | 0.7%  |
| <b>Antibiotic use</b>                                          |         |       |        |       |        |       |         |       |
| 1                                                              | 114,421 | 21.7% | 8,248  | 16.7% | 24,544 | 24.6% | 81,629  | 21.6% |
| 2                                                              | 63,151  | 12.0% | 9,359  | 18.9% | 19,035 | 19.1% | 34,757  | 9.2%  |
| 3+                                                             | 76,878  | 14.6% | 25,587 | 51.7% | 29,144 | 29.2% | 22,147  | 5.9%  |
| <b>Non-Italian citizen</b>                                     | 90,760  | 17.2% | 8,975  | 18.1% | 18,390 | 18.4% | 63,395  | 16.8% |
| <b>Copay exempted based on family income/employment status</b> | 244,911 | 46.4% | 37,502 | 75.8% | 64,776 | 65.0% | 142,633 | 37.7% |
| <b>Copay exempted based on disabled status</b>                 | 6,173   | 1.2%  | 2,029  | 4.1%  | 1,321  | 1.3%  | 2,823   | 0.7%  |
| <b>Specialty visits in pediatrics</b>                          |         |       |        |       |        |       |         |       |
| Medical                                                        | 12,642  | 2.4%  | 3,987  | 8.1%  | 2,735  | 2.7%  | 5,920   | 1.6%  |
| Surgical                                                       | 8,982   | 1.7%  | 2,060  | 4.2%  | 2,294  | 2.3%  | 4,628   | 1.2%  |



**Table 2: Birthing and Medical History of Mother\***

|                                                                  | Total Population |       | At Higher Risk |       | Higher than average |       | Lower than average |       |
|------------------------------------------------------------------|------------------|-------|----------------|-------|---------------------|-------|--------------------|-------|
|                                                                  |                  |       | Risk >2.5%     |       | Risk 1.2-2.5%       |       | Risk <1.2%         |       |
|                                                                  | 203,510          |       | 38,292         |       | 79,627              |       | 85,591             |       |
|                                                                  | Number           | %     | Number         | %     | Number              | %     | Number             | %     |
| <b>Birthing</b>                                                  |                  |       |                |       |                     |       |                    |       |
| <b>Age at delivery**</b>                                         |                  |       |                |       |                     |       |                    |       |
| 24 and less                                                      | 12,728           | 6.3%  | 3,275          | 8.6%  | 5,651               | 7.1%  | 3,802              | 4.4%  |
| 25-34                                                            | 88,370           | 43.4% | 18,227         | 47.6% | 35,681              | 44.8% | 34,462             | 40.3% |
| 35-39                                                            | 45,575           | 22.4% | 8,170          | 21.3% | 17,679              | 22.2% | 19,726             | 23.0% |
| 40 and over                                                      | 12,529           | 6.2%  | 2,344          | 6.1%  | 4,528               | 5.7%  | 5,657              | 6.6%  |
| <b>First delivery</b>                                            | 99,190           | 48.7% | 23,336         | 60.9% | 42,662              | 53.6% | 33,192             | 38.8% |
| <b>C-section</b>                                                 | 48,282           | 23.7% | 11,370         | 29.7% | 19,480              | 24.5% | 17,432             | 20.4% |
| <b>Baby's birth condition</b>                                    |                  |       |                |       |                     |       |                    |       |
| Normal Newborns                                                  | 172,497          | 84.8% | 30,214         | 78.9% | 67,522              | 84.8% | 74,761             | 87.3% |
| Abnormal Birth Weight                                            | 20,128           | 9.9%  | 4,757          | 12.4% | 7,756               | 9.7%  | 7,615              | 8.9%  |
| Other Abnormal Birth Condition                                   | 10,885           | 5.3%  | 3,321          | 8.7%  | 4,349               | 5.5%  | 3,215              | 3.8%  |
| <b>Medical History</b>                                           |                  |       |                |       |                     |       |                    |       |
| <b>Number of ordinary hospitalization 1 year before delivery</b> |                  |       |                |       |                     |       |                    |       |
| 1                                                                | 16,145           | 7.9%  | 4,578          | 12.0% | 6,856               | 8.6%  | 4,711              | 5.5%  |
| 2+                                                               | 3,920            | 1.9%  | 1,670          | 4.4%  | 1,500               | 1.9%  | 750                | 0.9%  |
| <b>Inappropriate prescription during pregnancy</b>               |                  |       |                |       |                     |       |                    |       |
| Class D                                                          | 10,594           | 5.2%  | 2,970          | 7.8%  | 3,886               | 4.9%  | 3,738              | 4.4%  |
| Class X                                                          | 4,874            | 2.4%  | 1,086          | 2.8%  | 1,811               | 2.3%  | 1,977              | 2.3%  |
| <b>Antibiotic use during pregnancy</b>                           | 60,679           | 29.8% | 14,422         | 37.7% | 25,757              | 32.3% | 20,500             | 24.0% |
| <b>3-year history before delivery</b>                            |                  |       |                |       |                     |       |                    |       |
| Abortion                                                         | 19,919           | 9.8%  | 4,970          | 13.0% | 8,165               | 10.3% | 6,784              | 7.9%  |
| Asthma                                                           | 35,590           | 17.5% | 9,026          | 23.6% | 14,894              | 18.7% | 11,670             | 13.6% |
| Bacterial pneumonia                                              | 188              | 0.1%  | 36             | 0.1%  | 14                  | 0.0%  | 138                | 0.2%  |
| Cardiovascular disease                                           | 18,756           | 9.2%  | 5,068          | 13.2% | 7,742               | 9.7%  | 5,946              | 6.9%  |
| Diabetes                                                         | 2,602            | 1.3%  | 1,003          | 2.6%  | 1,106               | 1.4%  | 493                | 0.6%  |
| Hypertension                                                     | 140              | 0.1%  | 51             | 0.1%  | 39                  | 0.0%  | 50                 | 0.1%  |
| Infection                                                        | 935              | 0.5%  | 283            | 0.7%  | 325                 | 0.4%  | 327                | 0.4%  |
| Psychological condition                                          | 9,215            | 4.5%  | 2,701          | 7.1%  | 3,709               | 4.7%  | 2,805              | 3.3%  |

\*Information about the delivery was considered only for children 1-5 years old.

\*\* For 22% of children we were not able to establish the mother-baby linkage.

**Table 3: Observed and Predicted Events by Risk Group**

| <b>Risk groups<br/>(predicted risk<br/>range)</b> | <b>N</b> | <b>Average<br/>predicted<br/>risk</b> | <b>Observed<br/>prevalenc<br/>e</b> | <b>Expected<br/>frequency<br/>based on<br/>predicted<br/>risk</b> | <b>Number of<br/>observed<br/>events</b> |
|---------------------------------------------------|----------|---------------------------------------|-------------------------------------|-------------------------------------------------------------------|------------------------------------------|
| Lower than<br>average ( $\leq 1.2\%$ )            | 378,258  | 0.5%                                  | 0.5%                                | 2,018                                                             | 1,896                                    |
| Higher than<br>average (1.2-<br>2.5%)             | 99,714   | 1.7%                                  | 1.8%                                | 1,690                                                             | 1,758                                    |
| At higher risk<br>( $> 2.5\%$ )                   | 49,486   | 5.4%                                  | 5.5%                                | 2,683                                                             | 2,737                                    |
| TOTAL                                             | 527,458  |                                       | 1.2%                                | 6,391                                                             | 6,391                                    |

**Table 4: C-statistic, Sensitivity, Specificity, and PPV**

|                                              | <b>C-statistic (overall model) = 0.78</b> |                                                                               |
|----------------------------------------------|-------------------------------------------|-------------------------------------------------------------------------------|
|                                              | <b>Cut-off points for comparison</b>      |                                                                               |
|                                              | <b>"At higher risk"<sup>1</sup> score</b> | <b>"At higher risk"<sup>1</sup> + "Higher than average"<sup>2</sup> score</b> |
| <b>Sensitivity<sup>3</sup></b>               | 0.43                                      | 0.70                                                                          |
| <b>Specificity<sup>4</sup></b>               | 0.91                                      | 0.72                                                                          |
| <b>Positive Predictive Value<sup>5</sup></b> | 0.06                                      | 0.03                                                                          |
| <b>True Positives<sup>6</sup></b>            | 2,737                                     | 4,495                                                                         |

<sup>1</sup>"At higher risk" is defined as patients with a predicted risk of hospitalization of > 2.5%.

<sup>2</sup>"At higher risk"<sup>1</sup> + "Higher than average", is defined as patients with a predicted risk of hospitalization of > 1.2%.

<sup>3</sup> Sensitivity is defined as the proportion of those hospitalized who were predicted to be hospitalized (true positive rate).

<sup>4</sup> Specificity is the proportion of those not hospitalized who were not predicted to be hospitalized (true negative rate).

<sup>5</sup> Positive Predictive Value is the proportion of those predicted to be hospitalized who were actually hospitalized.

<sup>6</sup> Positive Predictives are the number of residents who were predicted to be at risk of hospitalization at the predicted risk threshold and were actually hospitalized

**Figure 1: Model calibration: predicted and observed prevalence of hospitalization or death in 2015 by risk category**

For peer review only

1  
2  
3  
4  
5  
6  
7  
8  
9  
10  
11  
12  
13  
14  
15  
16  
17  
18  
19  
20  
21  
22  
23  
24  
25  
26  
27  
28  
29  
30  
31  
32  
33  
34  
35  
36  
37  
38  
39  
40  
41  
42  
43  
44  
45  
46  
47

1  
2  
3  
4  
5  
6  
7  
8  
9  
10  
11  
12  
13  
14  
15  
16  
17  
18  
19  
20  
21  
22  
23  
24  
25  
26  
27  
28  
29  
30  
31  
32  
33  
34  
35  
36  
37  
38  
39  
40  
41  
42  
43  
44  
45  
46  
47

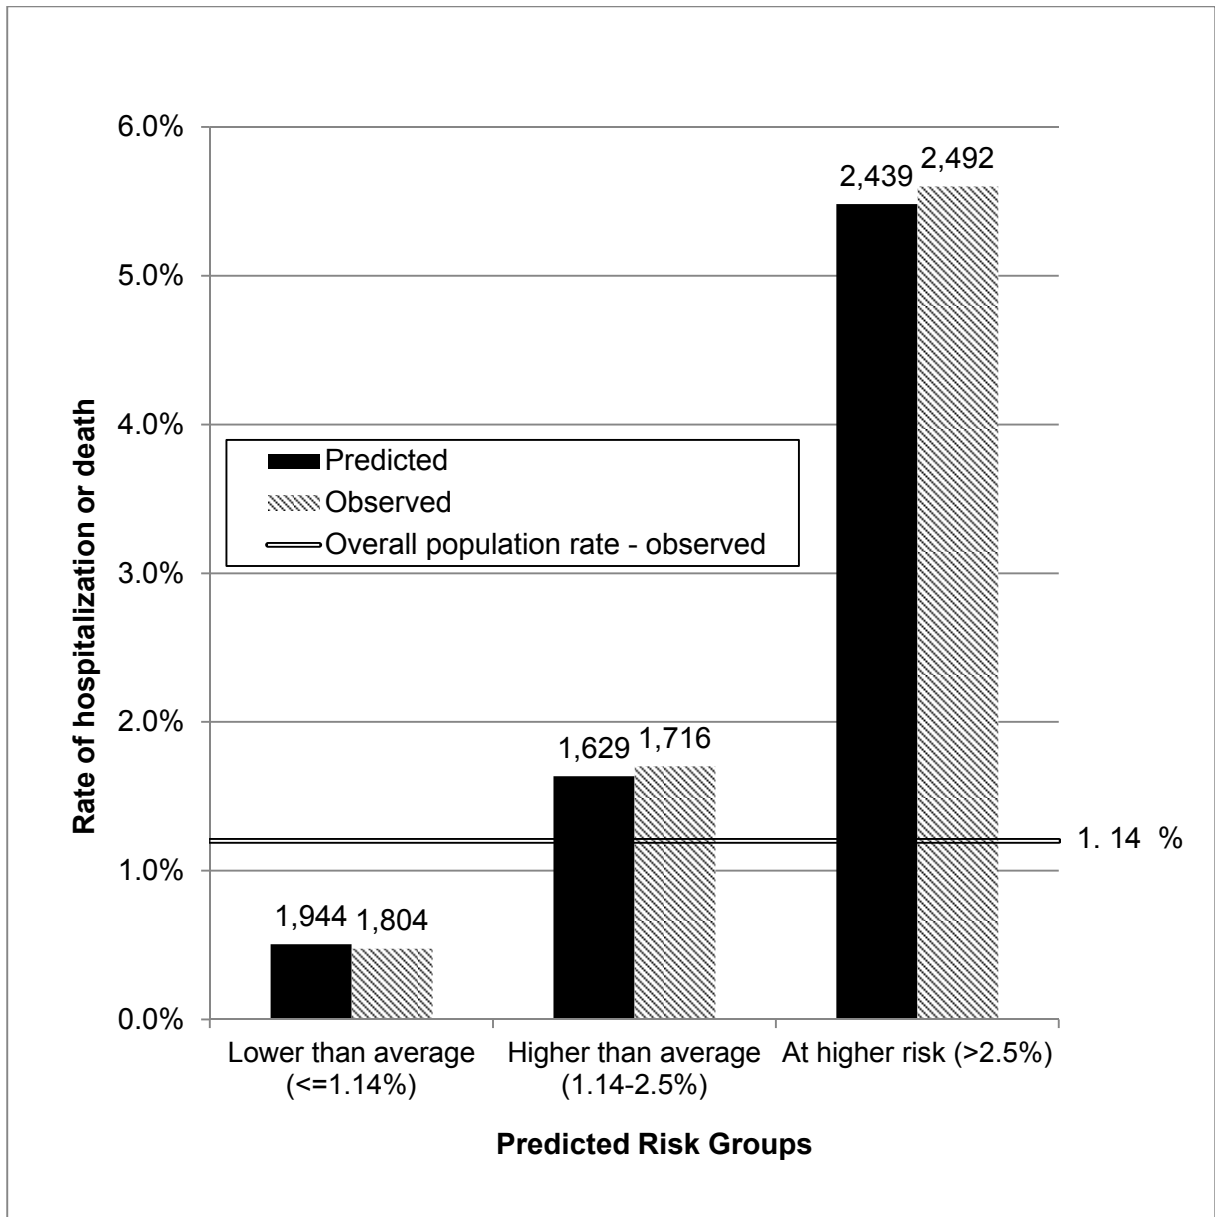

**STROBE 2007 (v4) checklist of items to be included in reports of observational studies in epidemiology\***  
**Checklist for cohort, case-control, and cross-sectional studies (combined)**

| Section/Topic             | Item # | Recommendation                                                                                                                                                                                                                                                                                                                                                                                                                                                         | Reported on page # |
|---------------------------|--------|------------------------------------------------------------------------------------------------------------------------------------------------------------------------------------------------------------------------------------------------------------------------------------------------------------------------------------------------------------------------------------------------------------------------------------------------------------------------|--------------------|
| Title and abstract        | 1      | (a) Indicate the study's design with a commonly used term in the title or the abstract                                                                                                                                                                                                                                                                                                                                                                                 | 1                  |
|                           |        | (b) Provide in the abstract an informative and balanced summary of what was done and what was found                                                                                                                                                                                                                                                                                                                                                                    | 2-3                |
| <b>Introduction</b>       |        |                                                                                                                                                                                                                                                                                                                                                                                                                                                                        |                    |
| Background/rationale      | 2      | Explain the scientific background and rationale for the investigation being reported                                                                                                                                                                                                                                                                                                                                                                                   | 4-5                |
| Objectives                | 3      | State specific objectives, including any pre-specified hypotheses                                                                                                                                                                                                                                                                                                                                                                                                      | 5                  |
| <b>Methods</b>            |        |                                                                                                                                                                                                                                                                                                                                                                                                                                                                        |                    |
| Study design              | 4      | Present key elements of study design early in the paper                                                                                                                                                                                                                                                                                                                                                                                                                | 6                  |
| Setting                   | 5      | Describe the setting, locations, and relevant dates, including periods of recruitment, exposure, follow-up, and data collection                                                                                                                                                                                                                                                                                                                                        | 6                  |
| Participants              | 6      | (a) <i>Cohort study</i> —Give the eligibility criteria, and the sources and methods of selection of participants. Describe methods of follow-up<br><i>Case-control study</i> —Give the eligibility criteria, and the sources and methods of case ascertainment and control selection. Give the rationale for the choice of cases and controls<br><i>Cross-sectional study</i> —Give the eligibility criteria, and the sources and methods of selection of participants | 7                  |
|                           |        | (b) <i>Cohort study</i> —For matched studies, give matching criteria and number of exposed and unexposed<br><i>Case-control study</i> —For matched studies, give matching criteria and the number of controls per case                                                                                                                                                                                                                                                 |                    |
| Variables                 | 7      | Clearly define all outcomes, exposures, predictors, potential confounders, and effect modifiers. Give diagnostic criteria, if applicable                                                                                                                                                                                                                                                                                                                               | 7-11               |
| Data sources/ measurement | 8*     | For each variable of interest, give sources of data and details of methods of assessment (measurement). Describe comparability of assessment methods if there is more than one group                                                                                                                                                                                                                                                                                   | 7-11               |
| Bias                      | 9      | Describe any efforts to address potential sources of bias                                                                                                                                                                                                                                                                                                                                                                                                              | 7-11               |
| Study size                | 10     | Explain how the study size was arrived at                                                                                                                                                                                                                                                                                                                                                                                                                              | 7                  |
| Quantitative variables    | 11     | Explain how quantitative variables were handled in the analyses. If applicable, describe which groupings were chosen and why                                                                                                                                                                                                                                                                                                                                           | 7-11               |
| Statistical methods       | 12     | (a) Describe all statistical methods, including those used to control for confounding                                                                                                                                                                                                                                                                                                                                                                                  | 11-12              |
|                           |        | (b) Describe any methods used to examine subgroups and interactions                                                                                                                                                                                                                                                                                                                                                                                                    |                    |
|                           |        | (c) Explain how missing data were addressed                                                                                                                                                                                                                                                                                                                                                                                                                            |                    |
|                           |        | (d) <i>Cohort study</i> —If applicable, explain how loss to follow-up was addressed<br><i>Case-control study</i> —If applicable, explain how matching of cases and controls was addressed                                                                                                                                                                                                                                                                              |                    |

|                          |     |                                                                                                                                                                                                                                                                                                                                                                                                               |                        |
|--------------------------|-----|---------------------------------------------------------------------------------------------------------------------------------------------------------------------------------------------------------------------------------------------------------------------------------------------------------------------------------------------------------------------------------------------------------------|------------------------|
|                          |     | <i>Cross-sectional study</i> —If applicable, describe analytical methods taking account of sampling strategy                                                                                                                                                                                                                                                                                                  |                        |
|                          |     | (e) Describe any sensitivity analyses                                                                                                                                                                                                                                                                                                                                                                         |                        |
| <b>Results</b>           |     |                                                                                                                                                                                                                                                                                                                                                                                                               |                        |
| Participants             | 13* | (a) Report numbers of individuals at each stage of study—eg numbers potentially eligible, examined for eligibility, confirmed eligible, included in the study, completing follow-up, and analysed<br>(b) Give reasons for non-participation at each stage<br>(c) Consider use of a flow diagram                                                                                                               | 12                     |
| Descriptive data         | 14* | (a) Give characteristics of study participants (eg demographic, clinical, social) and information on exposures and potential confounders<br>(b) Indicate number of participants with missing data for each variable of interest<br>(c) <i>Cohort study</i> —Summarise follow-up time (eg, average and total amount)                                                                                           | 12-14, Table 1 and 2   |
| Outcome data             | 15* | <i>Cohort study</i> —Report numbers of outcome events or summary measures over time<br><i>Case-control study</i> —Report numbers in each exposure category, or summary measures of exposure<br><i>Cross-sectional study</i> —Report numbers of outcome events or summary measures                                                                                                                             | 12-14, Table 3         |
| Main results             | 16  | (a) Give unadjusted estimates and, if applicable, confounder-adjusted estimates and their precision (eg, 95% confidence interval). Make clear which confounders were adjusted for and why they were included<br>(b) Report category boundaries when continuous variables were categorized<br>(c) If relevant, consider translating estimates of relative risk into absolute risk for a meaningful time period | 14-15, Table 4, Fig. 1 |
| Other analyses           | 17  | Report other analyses done—eg analyses of subgroups and interactions, and sensitivity analyses                                                                                                                                                                                                                                                                                                                |                        |
| <b>Discussion</b>        |     |                                                                                                                                                                                                                                                                                                                                                                                                               |                        |
| Key results              | 18  | Summarise key results with reference to study objectives                                                                                                                                                                                                                                                                                                                                                      | 15                     |
| Limitations              | 19  | Discuss limitations of the study, taking into account sources of potential bias or imprecision. Discuss both direction and magnitude of any potential bias                                                                                                                                                                                                                                                    | 16                     |
| Interpretation           | 20  | Give a cautious overall interpretation of results considering objectives, limitations, multiplicity of analyses, results from similar studies, and other relevant evidence                                                                                                                                                                                                                                    | 17                     |
| Generalisability         | 21  | Discuss the generalisability (external validity) of the study results                                                                                                                                                                                                                                                                                                                                         | 17                     |
| <b>Other information</b> |     |                                                                                                                                                                                                                                                                                                                                                                                                               |                        |
| Funding                  | 22  | Give the source of funding and the role of the funders for the present study and, if applicable, for the original study on which the present article is based                                                                                                                                                                                                                                                 | 18                     |

\*Give information separately for cases and controls in case-control studies and, if applicable, for exposed and unexposed groups in cohort and cross-sectional studies.  
**Note:** An Explanation and Elaboration article discusses each checklist item and gives methodological background and published examples of transparent reporting. The STROBE checklist is best used in conjunction with this article (freely available on the Web sites of PLoS Medicine at <http://www.plosmedicine.org/>, Annals of Internal Medicine at <http://www.annals.org/>, and Epidemiology at <http://www.epidem.com/>). Information on the STROBE Initiative is available at [www.strobe-statement.org](http://www.strobe-statement.org).

# BMJ Open

## Predicting Risk of Hospitalization: A retrospective population-based analysis in a Pediatric Population in Emilia-Romagna, Italy

|                                 |                                                                                                                                                                                                                                                                                                                                                                                                                                                                                                                                                                                                                                                                                                                                                                          |
|---------------------------------|--------------------------------------------------------------------------------------------------------------------------------------------------------------------------------------------------------------------------------------------------------------------------------------------------------------------------------------------------------------------------------------------------------------------------------------------------------------------------------------------------------------------------------------------------------------------------------------------------------------------------------------------------------------------------------------------------------------------------------------------------------------------------|
| Journal:                        | <i>BMJ Open</i>                                                                                                                                                                                                                                                                                                                                                                                                                                                                                                                                                                                                                                                                                                                                                          |
| Manuscript ID                   | bmjopen-2017-019454.R1                                                                                                                                                                                                                                                                                                                                                                                                                                                                                                                                                                                                                                                                                                                                                   |
| Article Type:                   | Research                                                                                                                                                                                                                                                                                                                                                                                                                                                                                                                                                                                                                                                                                                                                                                 |
| Date Submitted by the Author:   | 23-Nov-2017                                                                                                                                                                                                                                                                                                                                                                                                                                                                                                                                                                                                                                                                                                                                                              |
| Complete List of Authors:       | Louis, Daniel; Jefferson Medical College, Callahan, Clara; Thomas Jefferson University, Center for Research in Medical Education and Health Care<br>Robeson, Mary; Jefferson Medical College, Center for Research in Medical Education and Health Care<br>Liu, Mengdan; Jefferson Medical College, Center for Research in Medical Education and Health Care<br>McRae, Jacquelyn; Thomas Jefferson University, College of Population Health<br>Gonnella, Joseph; Jefferson Medical College, Center for Research in Medical Education and Health Care<br>Lombardi, Marco; Parma Local Health Authority<br>maio, vittorio; Thomas Jefferson University, College of Population Health; Thomas Jefferson University, Center for Research in Medical Education and Health Care |
| <b>Primary Subject Heading</b>: | Health services research                                                                                                                                                                                                                                                                                                                                                                                                                                                                                                                                                                                                                                                                                                                                                 |
| Secondary Subject Heading:      | Paediatrics                                                                                                                                                                                                                                                                                                                                                                                                                                                                                                                                                                                                                                                                                                                                                              |
| Keywords:                       | Predictive Risk Modeling, Paediatric Population, Population-based Study                                                                                                                                                                                                                                                                                                                                                                                                                                                                                                                                                                                                                                                                                                  |
|                                 |                                                                                                                                                                                                                                                                                                                                                                                                                                                                                                                                                                                                                                                                                                                                                                          |

SCHOLARONE™  
Manuscripts



1  
2  
3 **Predicting Risk of Hospitalization: A retrospective population-based analysis in a**  
4 **Pediatric Population in Emilia-Romagna, Italy**  
5

6 Daniel Z Louis<sup>1</sup>, Clara A. Callahan, MD<sup>1</sup>, Mary Robeson<sup>1</sup>, Mengdan Liu<sup>1</sup>, Jacquelyn McRae,  
7 PharmD<sup>2</sup>, Joseph S. Gonnella, MD<sup>1</sup>, Marco Lombardi, MD<sup>3</sup>, Vittorio Maio, PharmD, MS,  
8  
9 MSPH<sup>1,2</sup>  
10  
11  
12

13  
14 <sup>1</sup> Center for Medical Research in Medical Education and Health Care, Sidney Kimmel  
15 Medical College at Thomas Jefferson University, Philadelphia, USA  
16  
17

18  
19 <sup>2</sup> Jefferson College of Population Health, Thomas Jefferson University, Philadelphia, USA  
20  
21

22  
23 <sup>3</sup> Parma Local Health Authority, Parma, Emilia-Romagna, Italy  
24  
25  
26  
27  
28  
29

30 **Corresponding author:** Vittorio Maio, Jefferson College of Population Health, Thomas  
31 Jefferson University, 901 Walnut Street, 10th Floor, Philadelphia, PA 19107, Tel.215-955-  
32 1821, [vittorio.maio@jefferson.edu](mailto:vittorio.maio@jefferson.edu)  
33  
34  
35

36  
37 **Ethical approval:** This study was conducted under the auspices of regulation of privacy of the  
38 Emilia-Romagna Region N.3 of 24 April 2006 (title: Processing of sensitive data) of act N.1 of 30  
39 May 2014 still in force. In addition, this study was approved by the Institutional Review Board  
40 (IRB) of Thomas Jefferson University as an expedited retrospective database/record review. The  
41 IRB granted a waiver of informed consent.  
42  
43  
44  
45  
46  
47  
48  
49  
50  
51  
52  
53  
54  
55  
56  
57  
58  
59  
60

**ABSTRACT** (294 words)

**Objectives** Develop predictive models for a pediatric population that provide information for pediatricians and health authorities to identify children at risk of hospitalisation for conditions that may be impacted through improved patient care.

**Design** Retrospective healthcare utilisation analysis with multivariable logistic regression models.

**Data** Demographic information linked with utilisation of health services in the years 2006–2014 was used to predict risk of hospitalisation or death in 2015 using a longitudinal administrative database of 527,458 children aged 1 to 13 residing in the Regione Emilia-Romagna (RER), Italy in 2014.

**Outcome measures** Models designed to predict risk of hospitalisation or death in 2015 for problems that are potentially avoidable were developed and evaluated using the C-statistic, for calibration to assess performance across levels of predicted risk, and in terms of their sensitivity, specificity and positive predictive value.

**Results** Of the 527,458 children residing in RER in 2014, 6,391 children (1.21%) were hospitalized for selected conditions or died in 2015. 49,486 children (9.4%) of the population were classified in the “At Higher Risk” group using a threshold of predicted risk >2.5%. The observed risk of hospitalization (5%) for the “At Higher Risk” group was more than 4 times higher than the overall population. We observed a C-statistic of 0.78 indicating good model performance. The model was well calibrated across categories of predicted risk.

**Conclusions** It is feasible to develop a population-based model using a longitudinal administrative database that identifies the risk of hospitalisation for a pediatric population.

1  
2  
3 The results of this model, along with profiles of children identified as high risk are being  
4  
5 provided to the pediatricians and other healthcare professionals providing care to this  
6  
7 population to aid in planning for care management and interventions that may reduce their  
8  
9 patients' likelihood of a preventable, high-cost hospitalisation.  
10  
11  
12  
13  
14  
15  
16

### 17 Strengths and limitations of this study

- 18 • This study included the entire pediatric population of the Emilia-Romagna Region of  
19 Italy, 527,458 children ages 1-13.
- 20 • The study used an existing longitudinal administrative healthcare database with  
21 both the advantage of much lower cost than new data collection and the  
22 disadvantage of gaps and potential errors in administrative data.
- 23 • The results of the study are being used to assist pediatricians and health authorities  
24 manage high risk children.  
25  
26  
27  
28  
29  
30  
31  
32  
33  
34  
35  
36  
37  
38  
39  
40  
41  
42  
43  
44  
45  
46  
47  
48  
49  
50  
51  
52  
53  
54  
55  
56  
57  
58  
59  
60

Review only

## INTRODUCTION

Healthcare systems have been moving from a passive approach of waiting for and reacting to patients' problems to a more active model that includes identification of patients at risk, taking the initiative in offering care and actively seeking to avoid recurrence or progression of medical problems. With the aging of populations worldwide, and high prevalence of chronic diseases, it is not surprising that these efforts have often focused on the elderly. Less attention has been paid to the pediatric population. However, despite the relatively low prevalence of chronic disease in children, there is evidence that children experience preventable hospitalizations. (1) For example, a study of pediatric inpatient claims in the United States estimated that pediatric "ambulatory care sensitive" conditions accounted for \$4.05 billion (USD) in hospital charges and over 1 million hospitalization days in a one year period. (2)

Predictive risk modeling is a tool that can be used to estimate the risk of an outcome within the context of pre-specified variables and uncertainty. Predictive risk modeling may offer an opportunity to better understand individuals who may be at higher risk for an undesirable outcome. (3) A number of predictive risk modeling studies have been conducted in pediatrics; however, many of these studies have focused on children with specific medical problems or use data that is not routinely available in administrative databases. (4)·(5)·(6)·(7)·(8)·(9)

1  
2  
3 Under the auspices of the Italian National Health Service (NHS), the 21 regional  
4 governments are responsible for delivering health care through a network of  
5  
6 geographically defined Local Health Authorities. Primary care physicians, including  
7  
8 pediatricians, work for the Local Health Authorities as independent contractors. Every  
9  
10 Italian is expected to enroll with a primary care physician (a pediatrician for those under  
11  
12 age 14) who serve as the ‘gatekeepers’ for delivering primary care and coordinating  
13  
14 specialty services for their enrolled patients. (10) This focus on primary care is ideal for  
15  
16 the development and implementation of a proactive model of health care.  
17  
18  
19  
20  
21  
22

23 To further encourage coordinated care, the Regione Emilia-Romagna (RER) has  
24  
25 established Patient-Centered Medical Homes. The identification of patients who would  
26  
27 most benefit from outreach efforts is fundamental to achieving the goals of promoting  
28  
29 population health and practicing proactive medicine. The RER has therefore developed  
30  
31 and implemented a population-based model to predict risk of hospitalization or death for  
32  
33 adult residents in the region. (11) The results of the model are presented to physicians in  
34  
35 Patient-Centered Medical Homes as patient profiles to support care management and the  
36  
37 identification of patients who may benefit from additional outreach such as home health  
38  
39 care, disease management, or case management.  
40  
41  
42  
43  
44

45 Current risk models used in RER focus on the adult population. This paper describes  
46  
47 the development of predictive risk models for the pediatric population using the RER’s  
48  
49 regional longitudinal administrative healthcare database to help identify children who are  
50  
51 at risk of hospitalization for conditions that may be affected through improved patient care.  
52  
53  
54  
55  
56  
57  
58  
59  
60

## METHODS

### Data Source

The RER is a region of northern Italy that lies between the River Po and Apennine Mountains with approximately 4.5 million inhabitants. RER maintains a longitudinal healthcare database for all its residents. The RER database contains patient-level demographic data (age, gender, birth and death dates, location of residence, primary care physician/pediatrician) and utilization data for inpatient (hospital discharge abstract data with ICD-9-CM diagnosis and procedure codes, and admission/discharge dates), outpatient (laboratory, diagnoses, and physician services, pharmacy claims including WHO ATC/DDD system codes), (12). specialty (therapeutic procedures, rehabilitation, and specialist visits), and emergency room visits. Inpatient medications are not captured. Patients with disabilities or low family income are eligible for exemption of service copayment for specialty visits and outpatient prescriptions, which provide some socioeconomic information. Each resident is assigned an anonymous identifier so that utilization can be tracked over time while maintaining patient privacy. (13)

### Study Cohort

In Italy, children age 14 years old are required to switch from a pediatrician to a primary care physician; therefore, we limited the study population to children 1-13 years old on December 31<sup>st</sup>, 2014. The study population also was narrowed to exclude children who did not reside in RER for the entire year 2014. The study population was stratified

1  
2  
3 into three age groups: 1-2 years old (on December 31, 2014); 3-5 years old; 6-13 years old.  
4  
5 Children less than one year old on December 31, 2014 were not included in the study  
6  
7  
8 population due to insufficient data for prediction of outcomes.  
9

## 10 11 12 13 **Dependent Variable** 14

15  
16 The outcome was defined as the occurrence of hospitalization that could have  
17  
18 potentially been prevented or delayed with appropriate patient care or death by any cause.  
19  
20 (11) We developed a list of hospitalizations that are potentially preventable with  
21  
22 appropriate patient care using a three step process. First, we conducted a literature search  
23  
24 to evaluate pediatric studies that defined potentially avoidable disease in pediatrics that  
25  
26 could require hospitalization. (14), (15), (16) We began with the listing of ICD-9-CM codes  
27  
28 for “pediatric ambulatory care sensitive conditions” identified in Shi et al. (15) All  
29  
30 hospitalizations in 2013 of children in the target age groups were classified using both ICD-  
31  
32 9-CM codes and Disease Staging categories. (17), (18) The results were reviewed by the  
33  
34 authors of this paper and compared to the Shi et al list. A number of changes were made  
35  
36 for this project. For example, the list of immunization preventable conditions to be  
37  
38 included in the dependent variable was expanded to include currently available vaccines.  
39  
40 We included additional conditions, such as acute cystitis (ICD-9-CM code of 595.0) and  
41  
42 hypoglycemic coma (ICD-9-CM code of 251.0). Advanced stages of selected medical  
43  
44 problems were added where Stage 1 may not be avoidable but advanced stages can  
45  
46 potentially be delayed or prevented through timely intervention, e.g. Stage 2 or 3  
47  
48 appendicitis, Stage 2 or 3 sinusitis. While certainly not always preventable, we believed  
49  
50  
51  
52  
53  
54  
55  
56  
57  
58  
59  
60

1  
2  
3 that inclusion of hospitalizations for certain types of trauma and toxicities (e.g.,  
4 acetaminophen toxicity, adverse drug reactions, burns) was appropriate especially for a  
5 pediatric population. These changes are summarized in Appendix 1.  
6  
7

8  
9  
10 Finally, we used disease staging categories for inclusion of relevant hospitalizations  
11 that would have been missed using solely primary ICD-9-CM codes. For example, if a child  
12 was hospitalized with a primary diagnosis of respiratory failure with asthma (ICD-9-CM  
13 code of 493) as the secondary diagnosis, then the disease staging category of Asthma would  
14 include that admission that might have been missed by including only primary ICD-9-CM  
15 codes. This is summarized in Appendix 2.  
16  
17  
18  
19  
20  
21  
22  
23

24 Children hospitalized for these selected conditions or who died from any cause in  
25 2015 were counted as being positive for the outcome.  
26  
27  
28  
29  
30  
31

## 32 **Independent Variables**

33

34  
35 A list of predictor variables was developed utilizing the RER administrative data  
36 from 2006-2014. Independent variables included information such as: demographics,  
37 socioeconomic factors, diseases/conditions grouped by etiology or body systems, mother's  
38 medical history and pregnancy/birthing information, emergency-room visits, potentially  
39 inappropriate prescriptions and antibiotic usage.  
40  
41  
42  
43  
44  
45

46  
47 Demographic variables included age on December 31st, 2014, gender, and  
48 citizenship (Italian or non-Italian). Children from low-income families or with disabilities  
49 are exempt from copayments for prescriptions and specialty visits. This information was  
50 used as a potential predictor variable.  
51  
52  
53  
54  
55  
56  
57  
58  
59  
60



1  
2  
3 We mapped diseases defined primarily by the affected body system with the  
4 exceptions of cancer, genetic conditions, and trauma which were based on etiology (11)  
5 using 2014 hospital discharge data, outpatient prescription information, and specialty visit  
6 claims. A total of 24 groups were defined. Disease Staging diagnostic categories was used  
7 to map hospital admissions to the 24 body system/etiology groups. (17) (see first column  
8 of Table 1) Patients with cardiovascular diseases, chronic respiratory diseases, diabetes  
9 mellitus, epilepsy, and disorders of the thyroid were identified using the Anatomical  
10 Therapeutic Chemical (ATC) Classification System codes from outpatient prescriptions.  
11 (19) Specialty visit records were also used for identifying medical conditions of some body  
12 systems. For example, if a child was admitted to the hospital for type 1 diabetes mellitus, or  
13 visited an endocrinologist, or had filled a prescription for insulin injection(s) (ATC code of  
14 A10AB), this patient would be identified as having an endocrine diagnosis in 2014.

15  
16  
17  
18  
19  
20  
21  
22  
23  
24  
25  
26  
27  
28  
29  
30  
31 Severity level codes (critical (C), acute (A), urgent but deferred (U), and not urgent  
32 (N)) are assigned to individuals upon discharge from the emergency department. We  
33 excluded ER visits that resulted in a hospital admission because diagnosis information was  
34 captured by hospital discharge data with more accurate information. We believe more  
35 frequent or severe ER visits may indicate a poor outcome, therefore, number of emergency  
36 room visits by severity level was calculated for each patient.

37  
38  
39  
40  
41  
42  
43  
44  
45 There is evidence that the risks outweigh the benefits for certain medication usage  
46 in the pediatric population. (20) For example, certain mood-altering medications such as,  
47 citalopram, sertraline, fluvoxamine, and any tricyclic antidepressants are not  
48 recommended in children of any age. Some medications can be harmful within specified  
49 ages. For example, loperamide is not indicated for children under three years old. For  
50  
51  
52  
53  
54  
55  
56  
57  
58  
59  
60

1  
2  
3 children who filled an outpatient prescription in 2014, we calculated their age at  
4 dispensation date and amount of medications they had filled, in order to identify patients  
5 with potentially inappropriate prescriptions in 2014. The number of antibiotic  
6 prescriptions utilized in 2014 was estimated since high utilization of antibiotics has been  
7 linked to decreased gut microflora, decreased immune function, and resistant strains of  
8 bacteria. (21)  
9  
10  
11  
12  
13  
14  
15  
16

17 For children ages 1-5 the models considered problems identified at birth as  
18 potential predictors using hospital discharge abstract data. About 86% of the newborns  
19 were healthy, with no serious medical problems noted on their birth records. Infants with  
20 diagnostic categories of premature birth with low birth weight, full-term infants with  
21 abnormal birth weight, premature with very low birth weight, or extremely low birth  
22 weight, were classified as abnormal birth weight; all other conditions were considered as a  
23 group. The mothers' delivery information, such as age at delivery, C-section, and parity,  
24 were identified based on the mothers' hospitalization records, and linked to children.  
25 Information about deliveries that occurred outside hospitals could not be captured.  
26  
27  
28  
29  
30  
31  
32  
33  
34  
35  
36  
37

38 Children ages 1-5 years old were also linked with information regarding their  
39 mothers' medical history and drug use during pregnancy. There is evidence on the  
40 association between pre-natal (up-to 270 days before delivery) exposure to antibiotics and  
41 the development of asthma. (22) We estimated the total exposure to any antibiotics during  
42 the pre-natal period using the mother outpatient prescription claims. We included two  
43 categories of mother's potentially inappropriate drug use, class D (potential risks outweigh  
44 the benefits) and X (contraindicated during pregnancy), since these drugs may be linked to  
45 harm to children. Mothers' 3 year medical history before delivery was retrieved for  
46  
47  
48  
49  
50  
51  
52  
53  
54  
55  
56  
57  
58  
59  
60

1  
2  
3 identifying certain conditions such as abortion, diabetes and psychological condition. For  
4  
5 about 22% of children we were not able to establish the mother-baby linkage.  
6  
7

8 We developed history variables with up to five years of data (pharmacy, specialty,  
9  
10 hospital admission, and emergency room visit) for children in age strata 3-5 years old and  
11  
12 6-13 years old. Children who had conditions in any year from 2009 to 2013 were flagged as  
13  
14 having a utilization history.  
15  
16

## 17 **Modeling**

18  
19  
20 Logistic regression was used to estimate predicted probabilities for the occurrence of  
21  
22 an inpatient hospital stay for the selected conditions, or death from any cause, for the  
23  
24 individual patients. Since age and gender may be strongly correlated with children's' risk,  
25  
26 we fit a total of six multivariable logistic regression models: female and male by age groups  
27  
28 (1-2, 3-5, and 6-13 years old). All models were developed using SAS 9.3 statistical software  
29  
30 (SAS Institute, Cary, NC, U.S.A.).  
31  
32  
33  
34  
35  
36  
37

## 38 **Model Validation**

39  
40 The predicted accuracy of the modeling was evaluated using C-statistics (the area  
41  
42 under the receiver operating characteristics curve), comparing the results of the 'predicted'  
43  
44 to the 'observed' outcomes in 2015. We stratified patients into risk strata based on the  
45  
46 predicted risk of hospitalization or death. "At higher risk" was defined as children with a  
47  
48 predicted risk greater than 2.5%. "Higher than average" was defined as children with a  
49  
50 predicted risk of hospitalization or death between the mean rate and 2.5%. The rest of  
51  
52 population was grouped into "Lower than average". These risk strata were defined to yield  
53  
54  
55  
56  
57  
58  
59  
60

1  
2  
3 a manageable number of patients to review for the typical pediatric panel of approximately  
4 800 patients. Calibration of the model across these risk groups was assessed by comparing  
5 observed to predicted rates among the risk groups. We also report the sensitivity,  
6  
7  
8 specificity and positive predictive value (PPV) for the defined risk group cutoffs.  
9  
10  
11  
12  
13  
14  
15  
16

## 17 **RESULTS**

### 18 **Characterization of Risk Groups**

19  
20  
21  
22  
23 A total of 568,117 children ages 1 through 13 resided in RER in 2014. We excluded  
24 from our analysis 40,659 children (7.2%) who did not reside in RER for the entire year  
25 resulting in a population of 527,458 children. Of those, 6,391 children (1.21%) were  
26 hospitalized for selected conditions or died in 2015. Table 1 displays the distribution of  
27 gender, age category, presence of selected chronic conditions, ER visits, selected  
28 prescription drug usage, co-pay exemption for income or disability and specialty visits for  
29 the eligible RER residents as of December 31 2014.  
30  
31  
32  
33  
34  
35  
36  
37  
38  
39

40 Table 1 also compares the characteristics of the total selected pediatric population to  
41 the subgroups of the population classified by risk categories based on the model results.  
42  
43 Forty nine thousand four hundred and eighty-six children (9.4%) of the population were  
44 classified in the "At Higher Risk" group using a threshold of predicted risk >2.5%. The  
45 children predicted to be At Higher Risk were more likely to be male (58.9%) compared to  
46 51.5% in the total population. The two youngest age strata (1-2 and 3-5 years) had much  
47 higher proportions of children identified in the At Higher Risk group than the 6-13 year old  
48  
49  
50  
51  
52  
53  
54  
55  
56  
57  
58  
59  
60

1  
2  
3 children. For example, 18,112 (23%) of the children age 1-2 years were identified in the At  
4  
5 Higher Risk Group. This age category includes 36% of the At Higher Risk children although  
6  
7 it represents 15% of the total pediatric population. Children in the “At Higher Risk”  
8  
9 category were more likely to have each of the selected conditions. When looking at the  
10  
11 highest prevalence conditions, 43.8% of children in the “At Higher Risk” category had an  
12  
13 ear, nose, or throat problem, compared to 6.1% in the overall population; 5.5% had a  
14  
15 gastrointestinal problem compared to 1.4% in the overall population; 4.3% had a  
16  
17 neurological problem compared to 0.7% in the overall population; 14.7% had a respiratory  
18  
19 problem compared to 3.9% in the overall population; and 11.7% had a skin problem  
20  
21 compared to 7.5% in the overall population.  
22  
23  
24  
25  
26

27  
28 Children identified as being “At Higher Risk” were much more likely to have a history  
29  
30 of emergency room visits and were more likely to have a history of 2, 3, or more antibiotic  
31  
32 prescriptions. Overall, 14.6% of children had 3 or more antibiotic prescriptions; in the “At  
33  
34 Higher Risk” category 51.7% had a history of 3 or more antibiotic prescriptions. Children  
35  
36 with exemptions from co-payments due to either family income or disability were more  
37  
38 likely to be identified as being At Higher Risk as were children with a history of medical or  
39  
40 surgical specialty visits.  
41  
42  
43  
44

45 Table 2 displays information about the delivery (for the children age 1-5) and medical  
46  
47 history of the mother for those children where we were able to match to their mother’s  
48  
49 record. First children, children who were delivered by caesarean section and children  
50  
51 where an abnormal birth weight or other problems were noted at birth were more likely to  
52  
53 be classified in the “At Higher Risk” category. If the mother was prescribed a potentially  
54  
55  
56  
57  
58  
59  
60

1  
2  
3 inappropriate drug or an antibiotic during pregnancy, the child was more likely to be  
4  
5 classified in the “At Higher Risk” category. When examining a 3 year medical history of the  
6  
7 mother, the mother’s asthma, cardiovascular disease, diabetes mellitus, or mental health  
8  
9 problems, or the record of a previous abortion, were all relatively frequent and more  
10  
11 prevalent in the mothers of children predicted to be in the “At Higher Risk” category.  
12  
13  
14  
15  
16  
17  
18

## 19 **Calibration**

20  
21  
22 The population was divided into three risk groups based on predicted probability of  
23  
24 hospitalization as defined above. We observed good calibration; each stratum’s predicted  
25  
26 risks were similar to observed prevalence of hospitalizations or deaths. (Figure 1)  
27  
28 Individuals, who fell in the “At Higher Risk” group, with predicted risk greater than 2.5%,  
29  
30 had 2,683 predicted events based on the model results, and 2,737 observed events. While  
31  
32 the overall rate of hospitalization or death for children ages 1-13 was 1.21% the predicted  
33  
34 and observed risk of the “At Higher Risk” group was over 5%.  
35  
36  
37  
38  
39  
40  
41

## 42 **Model Performance among Risk Groups**

43  
44  
45 We observed a c-statistic of 0.78 indicating good model performance (Table 3). The  
46  
47 sensitivity (proportion predicted to be At Higher Risk of those who had an event in 2015)  
48  
49 was 0.43 and 0.70 for predicted risk categories of “at higher risk” and “higher than  
50  
51 average”, respectively (Table 4). In other words, among those whom were hospitalized or  
52  
53 deceased in 2015, 43% were predicted to have risk greater than 2.5% of hospitalization or  
54  
55  
56  
57  
58  
59  
60

1  
2  
3 death, and 70% have risk higher than average. The specificity (proportion predicted to be  
4 at a “lower” risk of those who did not have an event) was 0.91 and 0.72 for the predicted  
5  
6  
7  
8 ‘higher’ and “higher than average” risk categories; among those who were not hospitalized  
9  
10 and did not die in 2015, 91% were not predicted to be “at higher risk”. The positive  
11  
12 predictive value (proportion with an event of those who were predicted to be at an  
13  
14 elevated risk) was 0.06 and 0.03 for the “higher” and “higher than average” predicted risk  
15  
16 categories. In other words, of those individuals who were estimated to have a >2.5% risk  
17  
18 of hospitalization or death approximately 6% had an event in 2015. (Regression  
19  
20 coefficients and significance levels of independent variables for multivariable logistic  
21  
22 regression models for each the 6 age and gender strata are included in Appendix 3).  
23  
24  
25  
26  
27  
28  
29  
30  
31

## 32 **DISCUSSION**

33  
34 We have developed a population-based model that identifies risk of hospitalization  
35  
36 for potentially preventable problems in a pediatric population including all children under  
37  
38 the age of 14 living in the RER of Italy. The C-statistic of 0.78 indicates that the model  
39  
40 performs well. By comparison, in a study predicting high-cost pediatric patients, Leininger  
41  
42 et al reported a C-statistic of 0.73. (9) In their work in predictive risk modeling in the UK,  
43  
44 Billings et al reported a C-statistics of .685 (23) and C-statistics ranging from .731 to .780.  
45  
46 (24) However, neither of these papers focused on a pediatric population. In a project also  
47  
48 conducted in the Emilia-Romagna region of Italy but focused on the adult population, Louis  
49  
50 et al (11) reported a C-statistic of .856. Given the similar organization of the health care  
51  
52 system and the similar database used for the adult and pediatric analyses, we believe that  
53  
54  
55  
56  
57  
58  
59  
60

1  
2  
3 the somewhat lower C-statistic in the pediatric study results from the fact that  
4  
5 hospitalization is less frequent in children.  
6  
7

8  
9 We believe that the definition of the dependent variable used in our models  
10  
11 increases the likelihood that they are identifying patients whose risk may be reduced  
12  
13 through proactive care. We have updated previously published criteria to include  
14  
15 hospitalizations that may have been prevented by currently available vaccines. And we  
16  
17 have used the logic of disease staging to include relevant hospitalizations that would have  
18  
19 been missed using solely primary ICD-9-CM codes. Specifics of the selection criteria are  
20  
21 available in the supplemental material.  
22  
23  
24  
25

26 The richness of the administrative data available in the RER allowed for a robust  
27  
28 definition of the predictive variables. The RER data allow for the linkage of patients' use of  
29  
30 diverse in and out-patient health care services over multiple years. In addition, the ability  
31  
32 to link child and mother's information allows the models to consider some of the mother's  
33  
34 medical history such as the presence of chronic disease and use of prescription drugs in the  
35  
36 years prior to birth as well as complications that may have arisen at birth.  
37  
38  
39  
40

41 There are limitations to our models. The models were developed with  
42  
43 administrative data which lack some of the clinical specificity which would be useful in  
44  
45 assessing patient risk. Children who have not had the types of encounters included in the  
46  
47 RER database would have potentially missing information. The RER database does not  
48  
49 have encounter level diagnostic data available documenting visits with the primary care  
50  
51 pediatrician. The administrative data have very limited information available about the  
52  
53 patient and family socio economic status. Our models use prior utilization among the  
54  
55  
56  
57  
58  
59  
60



1  
2  
3 predictor variables. With the administrative date, we cannot distinguish appropriate from  
4  
5 inappropriate prior utilization which may bias our results. Despite their limitations  
6  
7 administrative data have many advantages for a project such as ours. They are relatively  
8  
9 inexpensive to analyze and in the case of the RER include a large population over multiple  
10  
11 years.  
12  
13

14  
15 While the evidence was mixed, a systematic review suggests that hospitalizations  
16  
17 can be prevented in children with medical complexity. (1) The Local Health Authority of  
18  
19 Parma has begun working with the primary care pediatricians caring for the patients  
20  
21 identified by the models to develop individual “profiles” of children identified as being at  
22  
23 higher risk. Data in the profiles, along with the more detailed information available in the  
24  
25 medical record, can be used by the pediatricians to assess what additional intervention, if  
26  
27 any, may help to manage the child’s risk. For example, review of the profiles of higher risk  
28  
29 children can help identify children whose parents might be contacted for a visit if they have  
30  
31 not been seen recently. Summaries of prescriptions that have been filled from the profiles  
32  
33 can be reviewed for potential over use, under use, or inappropriate use of medication. High  
34  
35 risk children with chronic illness might be referred to a specialist or home health care  
36  
37 provided.  
38  
39  
40  
41  
42  
43

44  
45 The RER healthcare system offers several advantages in the goal of reducing  
46  
47 potentially preventable hospitalization. Every child is enrolled with a primary care  
48  
49 pediatrician. The population is quite stable allowing for continuity of care. Through the  
50  
51 Italian National Health Service every child is entitled to health care with little or no cost at  
52  
53 the point of service. While the primary care pediatricians are paid on a per capita basis the  
54  
55  
56  
57  
58  
59  
60

1  
2  
3 RER can negotiate incentive payments and monitor improvements in care that may help to  
4  
5 reduce avoidable hospitalizations. If successful, the results of the models can be applied by  
6  
7 other Local Health Authorities in the Regione Emilia-Romagna, other Italian regions, and  
8  
9 other countries with similar data availability.  
10  
11  
12  
13  
14  
15  
16  
17  
18  
19  
20  
21  
22  
23  
24  
25  
26  
27  
28  
29  
30  
31  
32  
33  
34  
35  
36  
37  
38  
39  
40  
41  
42  
43  
44  
45  
46  
47  
48  
49  
50  
51  
52  
53  
54  
55  
56  
57  
58  
59  
60

For peer review only

1  
2  
3 **Contributors:** DZL, VM, ML, and JSG were responsible for the conceptualization of this  
4 project. MR and ML were responsible for creation of the datasets used in this project. DZL,  
5 CAC, VM, MR, and JSG were responsible for the definition of analytical variables. MR and ML  
6 were responsible for modeling and statistical analysis. DZL managed the research team. CAC,  
7 VM, ML, JM, and JSG advised on the analyses and results. All authors contributed to the  
8 preparation of the manuscript.  
9  
10  
11  
12  
13  
14  
15

16  
17 **Competing interests:** DZL and JSG declare personal fees from Truven Health Analytics. CAC,  
18 MR, ML, JM, ML, and VM declare no conflict of interests.  
19  
20  
21  
22

23 **Funding:** This research was funded by the Local Health Authority of Parma, Italy.  
24  
25

26 **Data:** Data used for this research were retrieved from the Regional database of the Emilia-  
27 Romagna Region provided through a collaborative agreement between the Regional Health Care  
28 and Social Agency, Emilia-Romagna, Italy, the Health Care Authority, Emilia-Romagna, Italy,  
29 and Thomas Jefferson University.  
30  
31  
32  
33  
34  
35

36 **Data Sharing:** No additional data available.  
37  
38

39 **Acknowledgments:** We thank Elena Saccenti, JD, Massimo Fabi, MD, and Ettore Brianti, MD,  
40 from the Local Health Authority, Parma, Italy, for their assistance; and Claudio Cantadori, MD,  
41 Sergio Capobianco, MD, Ada Donadio, MD, Maura Morelli, MD, and Michael Andreas Ramon  
42 Werth, MD, for their contribution in reviewing early results of our models.  
43  
44  
45  
46  
47  
48  
49  
50  
51  
52  
53  
54  
55  
56  
57  
58  
59  
60

1. Collier RJ, Nelson BB, Sklansky DJ, Saenz AA, Klitzner TS, Lerner CF, et al. Preventing Hospitalizations in Children with Medical Complexity: A Systematic Review. *Pediatrics*. 2014; 134(6).
2. Lu S, Kuo D. Hospital Charges of Potentially Preventable Pediatric Hospitalizations. *Acad Pediatr*. 2012; 12(5): p. 436-44.
3. Waljee A, Higgins P, Singal A. A Primer on Predictive Models. *Clinical and Translational Gastroenterology*. 2013; 44(4): p. e44.
4. Huang L, Li S, He D, Weiqun B, Li L. A predictive risk model for medical intractability in epilepsy. *Epilepsy and Behavior*. 2014; 37: p. 282-86.
5. Cerqueira DC, Soares CM, Silva VR, Magalhaes JO, Barcelona IP, Duarte MG, et al. A Predictive Model of Progression of CKD to ESRD in a Predialysis Pediatric Interdisciplinary Program. *Clin J Am Soc Nephrol*. 2014; 9(4): p. 728-35.
6. Lopes J, Goulart E, Siqueira A, Fonseca I, de Brito M, Starling C. Nosocomial Infections in Brazilian Pediatric Patients: Using a Decision Tree to Identify High Mortality Groups. *Brazilian Journal of Infectious Diseases*. 2009 Apr; 13: p. 2.
7. Gorelick M, Scribano P, Stevens M, Schultz T, Shults J. Predicting Need for Hospitalization in Acute Pediatric Asthma. *Pediatric Emergency Care*. 2008; 24(11): p. 735-43.
8. McAna J, Crawford AG, Novinger BW, Sidorov J, Din FM, Maio V, et al. A predictive model of hospitalization risk among disabled medical enrollees. *The American Journal of Managed Care*. 2013; 19(5): p. e166-74.
9. Leininger L, Saloner B, Wherry L. Predicting High-cost Pediatric Patients. *Medical Care*. 2015 August; 53(8): p. 729-735.
10. Lo Scalzo L, Donatini A, Orzella L, Cicchetti A, Profili S, Maresso A. Italy: Health System Review. Copenhagen: World Health Organization; 2009. Report No.: Volume 11, No. 6.
11. Louis D, Robeson M, McAna J, Maio V, Keith S, Liu M, et al. Predicting risk of hospitalisation or death: a retrospective population-based analysis. *BMJ open*. 2014; 4(9): p. e005223.
12. WHO Collaborating Centre for Drug Statistics Methodology. Guidelines for ATC classification and DDD assignment 2013 Oslo; 2012.
13. The Emilia-Romagna Regional Health Service and the new welfare system: Facilities, expenditure, and activities as of 31.12.2010. Programs, agreements and organisational models. Bologna: Regione Emilia-Romagna Assessorato Politiche per la Salute; 2012.
14. Flores G, Abreu M, Chaisson C, Sun D. Keeping Children Out of Hospitals: Parents' and physicians' perspectives on how pediatric hospitalizations for ambulatory care-sensitive conditions can be avoided. *Pediatrics*. 2003; 112(5): p. 1021-1030.
15. Shi L, Lu N. Individual Sociodemographic Characteristics Associated with Hospitalization for Pediatric Ambulatory Care Sensitive Conditions. *Journal of Health Care for the Poor and Underserved*. 2000 November; 11(4): p. 373-384.
16. Pediatric Quality Measures Program. Content last reviewed July 2016. Agency for Healthcare Research and Quality, Rockville, MD. <http://www.ahrq.gov/policymakers/chipra/factsheets/fullreports/index.html>. [Online].
17. Gonnella JS, Hornbrook MC, Louis DZ. Staging of Disease A Case-Mix Measurement. *JAMA*. 1984; 251(5): p. 637-644.

18. Gonnella JS, Louis DZ, Gozum MV, Callahan CA, Barnes CA, editors. Disease Staging Clinical and Coded Criteria. 629th ed. Ann Arbor: Truven Health Analytics; 2012.
19. Maio V, Yuen EJ, Rabinowitz C, Jimbo M, Donatini A, Mall S, et al. Using pharmacy data to identify those with chronic conditions in Emilia-Romagna, Italy. *Journal of Health Services Research and Quality*. 2005; 10(4): p. 232-238.
20. Prot-Labarthe S, Weil T, Angoulvant F, Boukdedid R, Alberti C. POPI (Pediatrics: Omission of Prescriptions and Inappropriate Prescriptions): Development of a Tool to Identify Inappropriate Prescribing. *PLoS ONE*. 2014; 9(6): p. e101171.
21. Costelloe C, Metcalfe C, Lovering A, Mant D, Hay A. Effect of antibiotic prescribing in primary care on antimicrobial resistance in individual patients: systematic review and meta-analysis. *BMJ*. 2010; 340: p. c2096.
22. Metsala J, Lundqvist L, Virta L, Kaila M, Gissler M, Virtanen S. Prenatal and post-natal exposure to antibiotics and risk of asthma in childhood. *Clinical & Experimental Allergy*. 2014; 45: p. 137-145.
23. Billings J, Dixon J, Mijanovich T, Wennberg D. Case finding for patients at risk of readmission to hospital: development of algorithm to identify high risk patients. *BMJ*. 2006 August 12; 333(7563):327.
24. Billings J, Georghiou T, Blunt I, Bardsley M. Choosing a model to predict hospital admission: an observational study of new variants of predictive models for case finding. *BMJ Open*. 2013,3:e003352.

**Table 1: Study Population 2014**

|                                          | Total Population |       | At Higher Risk |       | Higher than average |       | Lower than average |       |
|------------------------------------------|------------------|-------|----------------|-------|---------------------|-------|--------------------|-------|
|                                          |                  |       | Risk >2.5%     |       | Risk >1.2-2.5%      |       | Risk ≤1.2%         |       |
|                                          | 527,458          |       | 49,486         |       | 99,714              |       | 378,258            |       |
|                                          | Number           | %     | Number         | %     | Number              | %     | Number             | %     |
| <b>Gender</b>                            |                  |       |                |       |                     |       |                    |       |
| Female                                   | 255,875          | 48.5% | 20,315         | 41.1% | 43,030              | 43.2% | 192,530            | 50.9% |
| Male                                     | 271,583          | 51.5% | 29,171         | 58.9% | 56,684              | 56.8% | 185,728            | 49.1% |
| <b>Age Group</b>                         |                  |       |                |       |                     |       |                    |       |
| 1 to 2 years                             | 78,051           | 14.8% | 18,112         | 36.6% | 44,084              | 44.2% | 15,855             | 4.2%  |
| 3 to 5 years                             | 125,459          | 23.8% | 20,180         | 40.8% | 35,543              | 35.6% | 69,736             | 18.4% |
| 6 to 13 years                            | 323,948          | 61.4% | 11,194         | 22.6% | 20,087              | 20.1% | 292,667            | 77.4% |
| <b>Selected condition/body system</b>    |                  |       |                |       |                     |       |                    |       |
| Cancer                                   | 1,138            | 0.2%  | 477            | 1.0%  | 252                 | 0.3%  | 409                | 0.1%  |
| Cardiovascular                           | 1,624            | 0.3%  | 653            | 1.3%  | 211                 | 0.2%  | 760                | 0.2%  |
| Dental Conditions                        | 442              | 0.1%  | 138            | 0.3%  | 109                 | 0.1%  | 195                | 0.1%  |
| Endocrine                                | 6,458            | 1.2%  | 1,276          | 2.6%  | 1,074               | 1.1%  | 4,108              | 1.1%  |
| Ear, Nose, Throat                        | 31,919           | 6.1%  | 21,664         | 43.8% | 7,376               | 7.4%  | 2,879              | 0.8%  |
| Eye                                      | 821              | 0.2%  | 165            | 0.3%  | 145                 | 0.1%  | 511                | 0.1%  |
| Genetic Conditions                       | 274              | 0.1%  | 188            | 0.4%  | 29                  | 0.0%  | 57                 | 0.0%  |
| Gastrointestinal                         | 7,380            | 1.4%  | 2,724          | 5.5%  | 1,578               | 1.6%  | 3,078              | 0.8%  |
| Genitourinary                            | 3,389            | 0.6%  | 987            | 2.0%  | 836                 | 0.8%  | 1,566              | 0.4%  |
| OB/GYN                                   | 128              | 0.0%  | 17             | 0.0%  | 19                  | 0.0%  | 92                 | 0.0%  |
| Hematological                            | 1,114            | 0.2%  | 596            | 1.2%  | 247                 | 0.2%  | 271                | 0.1%  |
| Hepatobiliary                            | 245              | 0.0%  | 82             | 0.2%  | 39                  | 0.0%  | 124                | 0.0%  |
| Immunologic Disease                      | 199              | 0.0%  | 80             | 0.2%  | 45                  | 0.0%  | 74                 | 0.0%  |
| Infectious Disease                       | 869              | 0.2%  | 596            | 1.2%  | 160                 | 0.2%  | 113                | 0.0%  |
| Male Genital                             | 1,329            | 0.3%  | 179            | 0.4%  | 209                 | 0.2%  | 941                | 0.2%  |
| Musculoskeletal                          | 3,817            | 0.7%  | 664            | 1.3%  | 453                 | 0.5%  | 2,700              | 0.7%  |
| Neurologic Diseases                      | 3,738            | 0.7%  | 2,123          | 4.3%  | 912                 | 0.9%  | 703                | 0.2%  |
| Nutrition                                | 924              | 0.2%  | 446            | 0.9%  | 201                 | 0.2%  | 277                | 0.1%  |
| Other Conditions                         | 1,703            | 0.3%  | 1,150          | 2.3%  | 247                 | 0.2%  | 306                | 0.1%  |
| Neonatal Conditions                      | 186              | 0.0%  | 111            | 0.2%  | 50                  | 0.1%  | 25                 | 0.0%  |
| Psychological                            | 854              | 0.2%  | 388            | 0.8%  | 141                 | 0.1%  | 325                | 0.1%  |
| Respiratory                              | 20,450           | 3.9%  | 7,285          | 14.7% | 5,886               | 5.9%  | 7,279              | 1.9%  |
| Skin                                     | 39,344           | 7.5%  | 5,809          | 11.7% | 7,461               | 7.5%  | 26,074             | 6.9%  |
| Trauma                                   | 737              | 0.1%  | 177            | 0.4%  | 167                 | 0.2%  | 393                | 0.1%  |
| <b>ER visits based on severity level</b> |                  |       |                |       |                     |       |                    |       |
| Critical                                 | 182              | 0.0%  | 117            | 0.2%  | 35                  | 0.0%  | 30                 | 0.0%  |
| Acute                                    | 15,029           | 2.8%  | 5,219          | 10.5% | 3,915               | 3.9%  | 5,895              | 1.6%  |

|                                                                |         |       |        |       |        |       |         |       |
|----------------------------------------------------------------|---------|-------|--------|-------|--------|-------|---------|-------|
| Urgent but could be deferred                                   | 118,372 | 22.4% | 26,945 | 54.5% | 33,241 | 33.3% | 58,186  | 15.4% |
| Not Urgent                                                     | 45,336  | 8.6%  | 11,216 | 22.7% | 13,080 | 13.1% | 21,040  | 5.6%  |
| <b>Inappropriate Rx*</b>                                       | 8,077   | 1.5%  | 2,376  | 4.8%  | 3,090  | 3.1%  | 2,611   | 0.7%  |
| <b>Antibiotic use</b>                                          |         |       |        |       |        |       |         |       |
| 1                                                              | 114,421 | 21.7% | 8,248  | 16.7% | 24,544 | 24.6% | 81,629  | 21.6% |
| 2                                                              | 63,151  | 12.0% | 9,359  | 18.9% | 19,035 | 19.1% | 34,757  | 9.2%  |
| 3+                                                             | 76,878  | 14.6% | 25,587 | 51.7% | 29,144 | 29.2% | 22,147  | 5.9%  |
| <b>Non-Italian citizen</b>                                     | 90,760  | 17.2% | 8,975  | 18.1% | 18,390 | 18.4% | 63,395  | 16.8% |
| <b>Copay exempted based on family income/employment status</b> | 244,911 | 46.4% | 37,502 | 75.8% | 64,776 | 65.0% | 142,633 | 37.7% |
| <b>Copay exempted based on disabled status</b>                 | 6,173   | 1.2%  | 2,029  | 4.1%  | 1,321  | 1.3%  | 2,823   | 0.7%  |
| <b>Specialty visits in pediatrics</b>                          |         |       |        |       |        |       |         |       |
| Medical                                                        | 12,642  | 2.4%  | 3,987  | 8.1%  | 2,735  | 2.7%  | 5,920   | 1.6%  |
| Surgical                                                       | 8,982   | 1.7%  | 2,060  | 4.2%  | 2,294  | 2.3%  | 4,628   | 1.2%  |

**Table 2: Birthing and Medical History of Mother\***

|                                                                  | Total Population |       | At Higher Risk |       | Higher than average |       | Lower than average |       |
|------------------------------------------------------------------|------------------|-------|----------------|-------|---------------------|-------|--------------------|-------|
|                                                                  |                  |       | Risk >2.5%     |       | Risk >1.2-2.5%      |       | Risk ≤1.2%         |       |
|                                                                  | 203,510          |       | 38,292         |       | 79,627              |       | 85,591             |       |
|                                                                  | Number           | %     | Number         | %     | Number              | %     | Number             | %     |
| <b>Birthing</b>                                                  |                  |       |                |       |                     |       |                    |       |
| <b>Age at delivery**</b>                                         |                  |       |                |       |                     |       |                    |       |
| 24 and less                                                      | 12,728           | 6.3%  | 3,275          | 8.6%  | 5,651               | 7.1%  | 3,802              | 4.4%  |
| 25-34                                                            | 88,370           | 43.4% | 18,227         | 47.6% | 35,681              | 44.8% | 34,462             | 40.3% |
| 35-39                                                            | 45,575           | 22.4% | 8,170          | 21.3% | 17,679              | 22.2% | 19,726             | 23.0% |
| 40 and over                                                      | 12,529           | 6.2%  | 2,344          | 6.1%  | 4,528               | 5.7%  | 5,657              | 6.6%  |
| <b>First delivery</b>                                            | 99,190           | 48.7% | 23,336         | 60.9% | 42,662              | 53.6% | 33,192             | 38.8% |
| <b>C-section</b>                                                 | 48,282           | 23.7% | 11,370         | 29.7% | 19,480              | 24.5% | 17,432             | 20.4% |
| <b>Baby's birth condition</b>                                    |                  |       |                |       |                     |       |                    |       |
| Normal Newborns                                                  | 172,497          | 84.8% | 30,214         | 78.9% | 67,522              | 84.8% | 74,761             | 87.3% |
| Abnormal Birth Weight                                            | 20,128           | 9.9%  | 4,757          | 12.4% | 7,756               | 9.7%  | 7,615              | 8.9%  |
| Other Abnormal Birth Condition                                   | 10,885           | 5.3%  | 3,321          | 8.7%  | 4,349               | 5.5%  | 3,215              | 3.8%  |
| <b>Medical History</b>                                           |                  |       |                |       |                     |       |                    |       |
| <b>Number of ordinary hospitalization 1 year before delivery</b> |                  |       |                |       |                     |       |                    |       |
| 1                                                                | 16,145           | 7.9%  | 4,578          | 12.0% | 6,856               | 8.6%  | 4,711              | 5.5%  |
| 2+                                                               | 3,920            | 1.9%  | 1,670          | 4.4%  | 1,500               | 1.9%  | 750                | 0.9%  |
| <b>Inappropriate prescription during pregnancy</b>               |                  |       |                |       |                     |       |                    |       |
| Class D                                                          | 10,594           | 5.2%  | 2,970          | 7.8%  | 3,886               | 4.9%  | 3,738              | 4.4%  |
| Class X                                                          | 4,874            | 2.4%  | 1,086          | 2.8%  | 1,811               | 2.3%  | 1,977              | 2.3%  |
| <b>Antibiotic use during pregnancy</b>                           | 60,679           | 29.8% | 14,422         | 37.7% | 25,757              | 32.3% | 20,500             | 24.0% |
| <b>3-year history before delivery</b>                            |                  |       |                |       |                     |       |                    |       |
| Abortion                                                         | 19,919           | 9.8%  | 4,970          | 13.0% | 8,165               | 10.3% | 6,784              | 7.9%  |
| Asthma                                                           | 35,590           | 17.5% | 9,026          | 23.6% | 14,894              | 18.7% | 11,670             | 13.6% |
| Bacterial pneumonia                                              | 188              | 0.1%  | 36             | 0.1%  | 14                  | 0.0%  | 138                | 0.2%  |
| Cardiovascular disease                                           | 18,756           | 9.2%  | 5,068          | 13.2% | 7,742               | 9.7%  | 5,946              | 6.9%  |
| Diabetes                                                         | 2,602            | 1.3%  | 1,003          | 2.6%  | 1,106               | 1.4%  | 493                | 0.6%  |
| Hypertension                                                     | 140              | 0.1%  | 51             | 0.1%  | 39                  | 0.0%  | 50                 | 0.1%  |
| Infection                                                        | 935              | 0.5%  | 283            | 0.7%  | 325                 | 0.4%  | 327                | 0.4%  |
| Psychological condition                                          | 9,215            | 4.5%  | 2,701          | 7.1%  | 3,709               | 4.7%  | 2,805              | 3.3%  |

\*Information about the delivery was considered only for children 1-5 years old.

\*\* For 22% of children we were not able to establish the mother-baby linkage.



**Table 3: Observed and Predicted Events by Risk Group**

| <b>Risk groups<br/>(predicted risk<br/>range)</b> | <b>N</b>       | <b>Average<br/>predicted risk</b> | <b>Observed<br/>prevalence</b> | <b>Expected<br/>frequency<br/>based on<br/>predicted<br/>risk</b> | <b>Number of<br/>observed<br/>events</b> |
|---------------------------------------------------|----------------|-----------------------------------|--------------------------------|-------------------------------------------------------------------|------------------------------------------|
| Lower than average<br>( $\leq 1.2\%$ )            | 378,258        | 0.5%                              | 0.5%                           | 2,018                                                             | 1,896                                    |
| Higher than average<br>( $> 1.2-2.5\%$ )          | 99,714         | 1.7%                              | 1.8%                           | 1,690                                                             | 1,758                                    |
| At higher risk<br>( $> 2.5\%$ )                   | 49,486         | 5.4%                              | 5.5%                           | 2,683                                                             | 2,737                                    |
| <b>TOTAL</b>                                      | <b>527,458</b> |                                   | <b>1.2%</b>                    | <b>6,391</b>                                                      | <b>6,391</b>                             |

**Table 4: C-statistic, Sensitivity, Specificity, and PPV**

|                                              | <b>C-statistic (overall model) = 0.78</b> |                                                                               |
|----------------------------------------------|-------------------------------------------|-------------------------------------------------------------------------------|
|                                              | <b>Cut-off points for comparison</b>      |                                                                               |
|                                              | <b>"At higher risk"<sup>1</sup> score</b> | <b>"At higher risk"<sup>1</sup> + "Higher than average"<sup>2</sup> score</b> |
| <b>Sensitivity<sup>3</sup></b>               | 0.43                                      | 0.70                                                                          |
| <b>Specificity<sup>4</sup></b>               | 0.91                                      | 0.72                                                                          |
| <b>Positive Predictive Value<sup>5</sup></b> | 0.06                                      | 0.03                                                                          |
| <b>True Positives<sup>6</sup></b>            | 2,737                                     | 4,495                                                                         |

<sup>1</sup>"At higher risk" is defined as patients with a predicted risk of hospitalization of > 2.5%.

<sup>2</sup>"At higher risk"<sup>1</sup> + "Higher than average", is defined as patients with a predicted risk of hospitalization of >1.2%.

<sup>3</sup> Sensitivity is defined as the proportion of those hospitalized who were predicted to be hospitalized (true positive rate).

<sup>4</sup> Specificity is the proportion of those not hospitalized who were not predicted to be hospitalized (true negative rate).

<sup>5</sup> Positive Predictive Value is the proportion of those predicted to be hospitalized who were actually hospitalized.

<sup>6</sup> Positive Predictives are the number of residents who were predicted to be at risk of hospitalization at the predicted risk threshold and were actually hospitalized

**Figure 1: Model calibration: predicted and observed prevalence of hospitalization or death in 2015 by risk category**

For peer review only

1  
2  
3  
4  
5  
6  
7  
8  
9  
10  
11  
12  
13  
14  
15  
16  
17  
18  
19  
20  
21  
22  
23  
24  
25  
26  
27  
28  
29  
30  
31  
32  
33  
34  
35  
36  
37  
38  
39  
40  
41  
42  
43  
44  
45  
46  
47  
48  
49  
50  
51  
52  
53  
54  
55  
56  
57  
58  
59  
60

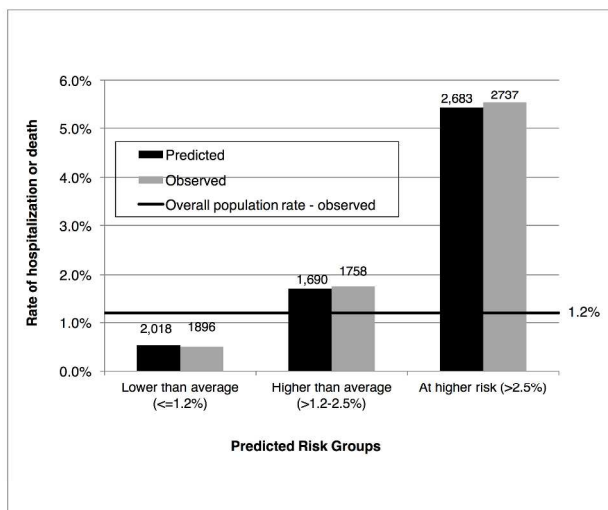

Figure 1. Model calibration: predicted and observed prevalence of hospitalization or death in 2015 by risk category

279x215mm (300 x 300 DPI)

View only

Appendix 1: Hospitalization that could have potentially been prevented or delayed with appropriate patient care

| Condition Category                     | Added Conditions                                                        |                                                               |                                                            |
|----------------------------------------|-------------------------------------------------------------------------|---------------------------------------------------------------|------------------------------------------------------------|
|                                        | ICD-9-CM Code <sup>+</sup>                                              | ICD-9-CM Code                                                 | Disease Staging Category                                   |
| Immunization preventable conditions    | 033 Whooping cough                                                      | 052 Chickenpox                                                | NEU14(Meningitis: Bacterial)*                              |
|                                        | <del>390 Rheumatic fever without mention of heart involvement</del>     | 055 Measles                                                   | RES11 (Influenza)**                                        |
|                                        | <del>391 Rheumatic fever with heart involvement</del>                   | 056 Rubella                                                   | RES23(Respiratory Syncytial Virus Infections 1.06 above)** |
|                                        | 037 Tetanus                                                             | 072 Mumps                                                     |                                                            |
|                                        | 045 Acute poliomyelitis                                                 |                                                               |                                                            |
|                                        | 320.0 Hemophilus meningitis                                             |                                                               |                                                            |
| Grand mal status/epileptic convulsions | 345 Epilepsy and recurrent seizures                                     |                                                               |                                                            |
| Convulsion                             | 780.3 Convulsions                                                       |                                                               |                                                            |
| Severe ENT infections                  | 382 Suppurative and unspecified otitis media                            | 381 Nonsuppurative otitis media and Eustachian tube disorders | ENT19 (Pharyngitis: Non-Streptococcal)*                    |
|                                        | 462 Acute pharyngitis                                                   |                                                               | ENT21 (Sinusitis 2/3)**                                    |
|                                        | 463 Acute tonsillitis                                                   |                                                               |                                                            |
|                                        | 465 Acute upper respiratory infections of multiple or unspecified sites |                                                               |                                                            |
|                                        | 472.1 Chronic pharyngitis                                               |                                                               |                                                            |
| Tuberculosis                           | 011 Pulmonary tuberculosis                                              | 010 Primary tuberculous infection                             |                                                            |
|                                        | 012 Other respiratory tuberculosis                                      | 137 Late effects of tuberculosis                              |                                                            |
|                                        | 013 Tuberculosis of meninges and central nervous system                 |                                                               |                                                            |
|                                        | 014 Tuberculosis of intestines, peritoneum, and mesenteric glands       |                                                               |                                                            |
|                                        | 015 Tuberculosis of bones and joints                                    |                                                               |                                                            |
|                                        | 016 Tuberculosis of genitourinary system                                |                                                               |                                                            |
|                                        | 017 Tuberculosis of other organs                                        |                                                               |                                                            |
|                                        | 018 Miliary tuberculosis                                                |                                                               |                                                            |
| Bacterial pneumonia                    | 481 Pneumococcal pneumonia [Streptococcus pneumoniae pneumonia]         | 482.0 Pneumonia due to Klebsiella pneumoniae                  |                                                            |
|                                        | 482.2 Pneumonia due to Hemophilus influenzae [H. influenzae]            | 482.1 Pneumonia due to Pseudomonas                            |                                                            |
|                                        | 482.3 Pneumonia due to Streptococcus                                    | 482.4 Pneumonia due to Staphylococcus                         |                                                            |
|                                        | 482.9 Bacterial pneumonia                                               | 482.8 Pneumonia due to                                        |                                                            |

<sup>+</sup> From Shi, L. & Lu, N. Individual Sociodemographic Characteristics Associated with Hospitalization for Pediatric Ambulatory Care Sensitive Conditions. *Journal of Health Care for the Poor and Underserved*. 2000; 11(4): 373-384.

\* Expansion of condition included in Shi and Lu

\*\* Addition to conditions in Shi and Lu

|                                     |                                                                       |                                                |                                                 |
|-------------------------------------|-----------------------------------------------------------------------|------------------------------------------------|-------------------------------------------------|
|                                     | unspecified                                                           | other specified bacteria                       |                                                 |
|                                     | 483 Pneumonia due to other specified organism                         |                                                |                                                 |
|                                     | 485 Bronchopneumonia, organism unspecified                            |                                                |                                                 |
|                                     | 486 Pneumonia, organism unspecified                                   |                                                |                                                 |
| <b>Asthma</b>                       | 493 Asthma                                                            |                                                |                                                 |
| <b>Cellulitis</b>                   | 681 Cellulitis and abscess of finger and toe                          |                                                |                                                 |
|                                     | 682 Other cellulitis and abscess                                      |                                                |                                                 |
|                                     | 683 Acute lymphadenitis                                               |                                                |                                                 |
|                                     | 686 Other local infections of skin and subcutaneous tissue            |                                                |                                                 |
|                                     | 707 Chronic ulcer of skin                                             |                                                |                                                 |
| <b>Diabetes</b>                     | 250.1 Diabetes with ketoacidosis                                      |                                                |                                                 |
|                                     | 250.2 Diabetes with hyperosmolarity                                   |                                                |                                                 |
|                                     | 250.3 Diabetes with other coma                                        |                                                |                                                 |
|                                     | 250.8 Diabetes with other specified manifestations                    |                                                |                                                 |
|                                     | 250.9 Diabetes with unspecified complication                          |                                                |                                                 |
|                                     | 250.0 Diabetes mellitus without mention of complication               |                                                |                                                 |
| <b>Gastroenteritis</b>              | 558.9 Other and unspecified noninfectious gastroenteritis and colitis | 008.6 Enteritis due to specified virus         | GIS32 (Salmonellosis)**                         |
|                                     |                                                                       | 008.8 Other organism, not elsewhere classified | GIS37 (Ulcerative Colitis 2/3)**                |
|                                     |                                                                       | 009 Ill-defined intestinal infections          |                                                 |
|                                     |                                                                       | 007 Other protozoal intestinal diseases        |                                                 |
|                                     |                                                                       | 558.2 Toxic gastroenteritis and colitis        |                                                 |
|                                     |                                                                       | 558.4 Eosinophilic gastroenteritis and colitis |                                                 |
| <b>Kidney and urinary infection</b> | 590 Infections of kidney                                              | 595.0 Acute cystitis                           | GUS10(Urinary Tract Infections 2/3)*            |
|                                     | 599.0 Urinary tract infection, site not specified                     | 595.9 Cystitis, unspecified                    | GUS83(Other Disorders of Kidney or Ureter 2/3)* |
|                                     | 599.9 Unspecified disorder of urethra and urinary tract               |                                                |                                                 |
| <b>Dehydration-volume depletion</b> | 276.5 Volume depletion                                                |                                                |                                                 |
| <b>Iron deficiency anemia</b>       | 280.1 Secondary to inadequate dietary iron intake                     |                                                |                                                 |
|                                     | 280.8 Other specified iron deficiency anemias                         |                                                |                                                 |
|                                     | 280.9 Iron deficiency anemia, unspecified                             |                                                |                                                 |
| <b>Nutritional deficiencies</b>     | 260 Kwashiorkor                                                       |                                                |                                                 |
|                                     | 261 Nutritional marasmus                                              |                                                |                                                 |
|                                     | 262 Other severe protein-calorie malnutrition                         |                                                |                                                 |
|                                     | 268.0 Rickets, active                                                 |                                                |                                                 |
|                                     | 268.1 Rickets, late effect                                            |                                                |                                                 |

|                                                      |                                                                                           |                                                 |                                                                 |
|------------------------------------------------------|-------------------------------------------------------------------------------------------|-------------------------------------------------|-----------------------------------------------------------------|
| <b>Failure to thrive</b>                             | 783.4 Lack of expected normal physiological development in childhood                      |                                                 |                                                                 |
| <b>Dental conditions</b>                             | 521 Diseases of hard tissues of teeth                                                     |                                                 |                                                                 |
|                                                      | 522 Diseases of pulp and periapical tissues                                               |                                                 |                                                                 |
|                                                      | 523 Gingival and periodontal diseases                                                     |                                                 |                                                                 |
|                                                      | 525 Other diseases and conditions of the teeth and supporting structures                  |                                                 |                                                                 |
|                                                      | 528 Diseases of the oral soft tissues, excluding lesions specific for gingiva and tongue  |                                                 |                                                                 |
| <b>Pelvic inflammatory disease</b>                   | 614 Inflammatory disease of ovary, fallopian tube, pelvic cellular tissue, and peritoneum |                                                 |                                                                 |
| <b>Hypoglycemia</b>                                  | 251.2 Hypoglycemia, unspecified                                                           | 251.0 Hypoglycemic coma                         |                                                                 |
|                                                      |                                                                                           | 251.1 Other specified hypoglycemia              |                                                                 |
|                                                      |                                                                                           | 775.0 Syndrome of "infant of a diabetic mother" |                                                                 |
| <b>Appendicitis (stage 2 or 3)</b>                   |                                                                                           |                                                 | GIS05(Appendicitis 2/3)*                                        |
| <b>Congenital Syphilis</b>                           |                                                                                           | 090.9 Congenital syphilis, unspecified          |                                                                 |
| <b>Cardiovascular disease (including CHF)</b>        |                                                                                           | 428 Heart failure                               |                                                                 |
| <b>Trauma (including Head Injury)</b>                |                                                                                           |                                                 | TRA01(Acetaminophen Toxicity)*                                  |
|                                                      |                                                                                           |                                                 | TRA02(Adverse Drug Reactions)*                                  |
|                                                      |                                                                                           |                                                 | TRA04(Burns)*                                                   |
|                                                      |                                                                                           |                                                 | TRA05(Burns, Chemical: Esophagus, Stomach, or Small Intestine)* |
|                                                      |                                                                                           |                                                 | TRA09(Toxic Effects of Nonmedicinal Agents)*                    |
|                                                      |                                                                                           |                                                 | NEU11(Injury: Craniocerebral)*                                  |
|                                                      |                                                                                           |                                                 | TRA80(Effects of Environment and Other External Causes 3)*      |
| <b>Rheumatic fever</b>                               | 390 Rheumatic fever without mention of heart involvement                                  |                                                 |                                                                 |
|                                                      | 391 Rheumatic fever with heart involvement                                                |                                                 |                                                                 |
| <b>Monotropic hormone deficiency</b>                 |                                                                                           |                                                 | END10 (Monotropic hormone deficiency 2/3)*                      |
| <b>Foreign Body: Nasopharynx, Throat or Bronchus</b> |                                                                                           |                                                 | ENT04 (Foreign Body: Nasopharynx, Throat or Bronchus)*          |
| <b>Gastritis</b>                                     |                                                                                           |                                                 | GIS17 (Gastritis 2/3)*                                          |

## Appendix 2: Admissions for a complication of selected conditions

| Condition Category                            | ICD-9-CM Code                                                           | Disease Staging Category includes Admissions for a Complication of Selected Conditions*                                                                                            |
|-----------------------------------------------|-------------------------------------------------------------------------|------------------------------------------------------------------------------------------------------------------------------------------------------------------------------------|
| <b>Immunization preventable conditions</b>    | 033 Whooping cough                                                      | RES28(Pertussis)                                                                                                                                                                   |
|                                               | 037 Tetanus                                                             | INF28 (Tetanus)                                                                                                                                                                    |
|                                               | 045 Acute poliomyelitis                                                 | INF20 (Poliomyelitis)                                                                                                                                                              |
|                                               | 320.0 Hemophilus meningitis                                             | NEU14(Meningitis: Bacterial)                                                                                                                                                       |
|                                               | 052 Chickenpox                                                          | INF30 (Varicella (Chickenpox) )                                                                                                                                                    |
|                                               | 055 Measles                                                             | INF18 (Measles or Rubeola)                                                                                                                                                         |
|                                               | 056 Rubella                                                             | INF25 (Rubella: Acquired)                                                                                                                                                          |
| 072 Mumps                                     | INF32 (Mumps)                                                           |                                                                                                                                                                                    |
| <b>Grand mal status/epileptic convulsions</b> | 345 Epilepsy and recurrent seizures                                     | NEU07(Epilepsy)                                                                                                                                                                    |
| <b>Convulsion</b>                             | 780.3 Convulsions                                                       |                                                                                                                                                                                    |
| <b>Severe ENT infections</b>                  | 381 Nonsuppurative otitis media and Eustachian tube disorders           | ENT18 (Otitis Media),ENT19 (Pharyngitis: Non-Streptococcal),ENT81 (Other Ear, Nose and Throat Disorders), ENT82(Other Ear, Nose, and Throat Infections)                            |
|                                               | 382 Suppurative and unspecified otitis media                            |                                                                                                                                                                                    |
|                                               | 462 Acute pharyngitis                                                   |                                                                                                                                                                                    |
|                                               | 463 Acute tonsillitis                                                   |                                                                                                                                                                                    |
|                                               | 465 Acute upper respiratory infections of multiple or unspecified sites |                                                                                                                                                                                    |
| 472.1 Chronic pharyngitis                     |                                                                         |                                                                                                                                                                                    |
| <b>Tuberculosis</b>                           | 010 Primary tuberculous infection                                       | RES27 (Tuberculosis)                                                                                                                                                               |
|                                               | 011 Pulmonary tuberculosis                                              |                                                                                                                                                                                    |
|                                               | 012 Other respiratory tuberculosis                                      |                                                                                                                                                                                    |
|                                               | 013 Tuberculosis of meninges and central nervous system                 |                                                                                                                                                                                    |
|                                               | 014 Tuberculosis of intestines, peritoneum, and mesenteric glands       |                                                                                                                                                                                    |
|                                               | 015 Tuberculosis of bones and joints                                    |                                                                                                                                                                                    |
|                                               | 016 Tuberculosis of genitourinary system                                |                                                                                                                                                                                    |
|                                               | 017 Tuberculosis of other organs                                        |                                                                                                                                                                                    |
|                                               | 018 Miliary tuberculosis                                                |                                                                                                                                                                                    |
| 137 Late effects of tuberculosis              |                                                                         |                                                                                                                                                                                    |
| <b>Bacterial pneumonia</b>                    | 481 Pneumococcal pneumonia [Streptococcus pneumoniae pneumonia]         | RES12(Mycoplasma pneumoniae Infection), RES15(Pneumonia: Bacterial), RES16(Pneumonia: Chlamydial), RES17(Pneumonia: Legionella), RES24 (Rhino, Adeno, and Corona Virus Infections) |
|                                               | 482.0 Pneumonia due to Klebsiella pneumoniae                            |                                                                                                                                                                                    |
|                                               | 482.1 Pneumonia due to Pseudomonas                                      |                                                                                                                                                                                    |
|                                               | 482.2 Pneumonia due to Hemophilus influenzae [H. influenzae]            |                                                                                                                                                                                    |
|                                               | 482.3 Pneumonia due to Streptococcus                                    |                                                                                                                                                                                    |
|                                               | 482.4 Pneumonia due to Staphylococcus                                   |                                                                                                                                                                                    |
|                                               | 482.8 Pneumonia due to other specified bacteria                         |                                                                                                                                                                                    |
|                                               | 482.9 Bacterial pneumonia unspecified                                   |                                                                                                                                                                                    |
|                                               | 483 Pneumonia due to other specified organism                           |                                                                                                                                                                                    |
| 485 Bronchopneumonia, organism unspecified    |                                                                         |                                                                                                                                                                                    |
| 486 Pneumonia, organism unspecified           |                                                                         |                                                                                                                                                                                    |
| <b>Asthma</b>                                 | 493 Asthma                                                              | RES02 (Asthma)                                                                                                                                                                     |
| <b>Cellulitis</b>                             | 681 Cellulitis and abscess of finger and toe                            |                                                                                                                                                                                    |



|                                     |                                                                       |                                                                                                                                                                                                                                                                                                                                                                                                                                                                                                                                                                                          |
|-------------------------------------|-----------------------------------------------------------------------|------------------------------------------------------------------------------------------------------------------------------------------------------------------------------------------------------------------------------------------------------------------------------------------------------------------------------------------------------------------------------------------------------------------------------------------------------------------------------------------------------------------------------------------------------------------------------------------|
|                                     | 682 Other cellulitis and abscess                                      |                                                                                                                                                                                                                                                                                                                                                                                                                                                                                                                                                                                          |
|                                     | 683 Acute lymphadenitis                                               |                                                                                                                                                                                                                                                                                                                                                                                                                                                                                                                                                                                          |
|                                     | 686 Other local infections of skin and subcutaneous tissue            |                                                                                                                                                                                                                                                                                                                                                                                                                                                                                                                                                                                          |
|                                     | 707 Chronic ulcer of skin                                             |                                                                                                                                                                                                                                                                                                                                                                                                                                                                                                                                                                                          |
| <b>Diabetes</b>                     | 250.1 Diabetes with ketoacidosis                                      | END04(Diabetes Mellitus Type 1),<br>END05(Diabetes Mellitus Type 2, Unspecified Types of Diabetes, and<br>Hyperglycemic States)                                                                                                                                                                                                                                                                                                                                                                                                                                                          |
|                                     | 250.2 Diabetes with hyperosmolarity                                   |                                                                                                                                                                                                                                                                                                                                                                                                                                                                                                                                                                                          |
|                                     | 250.3 Diabetes with other coma                                        |                                                                                                                                                                                                                                                                                                                                                                                                                                                                                                                                                                                          |
|                                     | 250.8 Diabetes with other specified manifestations                    |                                                                                                                                                                                                                                                                                                                                                                                                                                                                                                                                                                                          |
|                                     | 250.9 Diabetes with unspecified complication                          |                                                                                                                                                                                                                                                                                                                                                                                                                                                                                                                                                                                          |
|                                     | 250.0 Diabetes mellitus without mention of complication               |                                                                                                                                                                                                                                                                                                                                                                                                                                                                                                                                                                                          |
| <b>Gastroenteritis</b>              | 008.6 Enteritis due to specified virus                                | GIS81(Gastroenteritis)                                                                                                                                                                                                                                                                                                                                                                                                                                                                                                                                                                   |
|                                     | 008.8 Other organism, not elsewhere classified                        |                                                                                                                                                                                                                                                                                                                                                                                                                                                                                                                                                                                          |
|                                     | 009 Ill-defined intestinal infections                                 |                                                                                                                                                                                                                                                                                                                                                                                                                                                                                                                                                                                          |
|                                     | 007 Other protozoal intestinal diseases                               |                                                                                                                                                                                                                                                                                                                                                                                                                                                                                                                                                                                          |
|                                     | 558.2 Toxic gastroenteritis and colitis                               |                                                                                                                                                                                                                                                                                                                                                                                                                                                                                                                                                                                          |
|                                     | 558.4 Eosinophilic gastroenteritis and colitis                        |                                                                                                                                                                                                                                                                                                                                                                                                                                                                                                                                                                                          |
|                                     | 558.9 Other and unspecified noninfectious gastroenteritis and colitis |                                                                                                                                                                                                                                                                                                                                                                                                                                                                                                                                                                                          |
|                                     | 599.9 Unspecified disorder of urethra and urinary tract               |                                                                                                                                                                                                                                                                                                                                                                                                                                                                                                                                                                                          |
|                                     | 595.0 Acute cystitis                                                  |                                                                                                                                                                                                                                                                                                                                                                                                                                                                                                                                                                                          |
|                                     | 595.9 Cystitis, unspecified                                           |                                                                                                                                                                                                                                                                                                                                                                                                                                                                                                                                                                                          |
| <b>Kidney and urinary infection</b> | 590 Infections of kidney                                              | GUS10(Urinary Tract Infections, 1.02 above),<br>GUS83(Other Disorders of Kidney or Ureter),<br>GUS01(Bladder Disorders), END04(Diabetes Mellitus Type 1), END05(Diabetes Mellitus Type 2),<br>HEM06(Anemia: Sickle Cell), INF03(Candida (Monial) Infections), MGS08(Prostatitis),<br>PED06(Anomaly: Defects of Kidney),<br>GUS02(Calculus of the Urinary Tract),<br>GYN34(Vulvovaginitis), HEM19(Neoplasm, Malignant: Leukemia, Acute Nonlymphocytic),<br>MGS01(Benign Prostatic Hypertrophy),<br>NEU23(Injury: Spine and Spinal Cord: Low Back),<br>PED09(Anomaly: Neural Tube Defects) |
| <b>Dehydration-volume depletion</b> | 276.5 Volume depletion                                                | GIS12 (Food Poisoning: Other Organisms, 1.02 above), GIS13(Food Poisoning: S. aureus),<br>PED05(Anomaly: Congenital Megacolon),<br>NUT80(Other Electrolyte Disorders),<br>CVS12(Digoxin Toxicity), PSY05(Drug Abuse, Dependence, Intoxication: Alcohol)                                                                                                                                                                                                                                                                                                                                  |
| <b>Iron deficiency anemia</b>       | 280.1 Secondary to inadequate dietary iron intake                     | HEM05(Anemia: Iron Deficiency)                                                                                                                                                                                                                                                                                                                                                                                                                                                                                                                                                           |
|                                     | 280.8 Other specified iron deficiency anemias                         |                                                                                                                                                                                                                                                                                                                                                                                                                                                                                                                                                                                          |
|                                     | 280.9 Iron deficiency anemia, unspecified                             |                                                                                                                                                                                                                                                                                                                                                                                                                                                                                                                                                                                          |
| <b>Nutritional deficiencies</b>     | 260 Kwashiorkor                                                       | NUT81 (Other Nutritional and Metabolic Disorders),END18 (Vitamin D Deficiency),<br>PSY13(Eating disorders: Anorexia Nervosa),<br>GIS06(Celiac Disease)                                                                                                                                                                                                                                                                                                                                                                                                                                   |
|                                     | 261 Nutritional marasmus                                              |                                                                                                                                                                                                                                                                                                                                                                                                                                                                                                                                                                                          |
|                                     | 262 Other severe protein-calorie malnutrition                         |                                                                                                                                                                                                                                                                                                                                                                                                                                                                                                                                                                                          |
|                                     | 268.0 Rickets, active                                                 |                                                                                                                                                                                                                                                                                                                                                                                                                                                                                                                                                                                          |
|                                     | 268.1 Rickets, late effect                                            |                                                                                                                                                                                                                                                                                                                                                                                                                                                                                                                                                                                          |
| <b>Failure to thrive</b>            | 783.4 Lack of expected normal physiological development in childhood  |                                                                                                                                                                                                                                                                                                                                                                                                                                                                                                                                                                                          |

|                                    |                                                                                           |                                                                                                                                                                                                                                                                                                                                                                                                                                                                                                                                                                                                                                                                                                                                                                                                                                                                                                                                                                                                                                                                                                                                                                                                                                                                                                                                                                                                                                                                                   |
|------------------------------------|-------------------------------------------------------------------------------------------|-----------------------------------------------------------------------------------------------------------------------------------------------------------------------------------------------------------------------------------------------------------------------------------------------------------------------------------------------------------------------------------------------------------------------------------------------------------------------------------------------------------------------------------------------------------------------------------------------------------------------------------------------------------------------------------------------------------------------------------------------------------------------------------------------------------------------------------------------------------------------------------------------------------------------------------------------------------------------------------------------------------------------------------------------------------------------------------------------------------------------------------------------------------------------------------------------------------------------------------------------------------------------------------------------------------------------------------------------------------------------------------------------------------------------------------------------------------------------------------|
| <b>Dental conditions</b>           | 521 Diseases of hard tissues of teeth                                                     | DEN02(Dental Disease), DEN04 (Gingival and Periodontal Disease), DEN81(Other Disorders of Oral Cavity)                                                                                                                                                                                                                                                                                                                                                                                                                                                                                                                                                                                                                                                                                                                                                                                                                                                                                                                                                                                                                                                                                                                                                                                                                                                                                                                                                                            |
|                                    | 522 Diseases of pulp and periapical tissues                                               |                                                                                                                                                                                                                                                                                                                                                                                                                                                                                                                                                                                                                                                                                                                                                                                                                                                                                                                                                                                                                                                                                                                                                                                                                                                                                                                                                                                                                                                                                   |
|                                    | 523 Gingival and periodontal diseases                                                     |                                                                                                                                                                                                                                                                                                                                                                                                                                                                                                                                                                                                                                                                                                                                                                                                                                                                                                                                                                                                                                                                                                                                                                                                                                                                                                                                                                                                                                                                                   |
|                                    | 525 Other diseases and conditions of the teeth and supporting structures                  |                                                                                                                                                                                                                                                                                                                                                                                                                                                                                                                                                                                                                                                                                                                                                                                                                                                                                                                                                                                                                                                                                                                                                                                                                                                                                                                                                                                                                                                                                   |
|                                    | 528 Diseases of the oral soft tissues, excluding lesions specific for gingiva and tongue  |                                                                                                                                                                                                                                                                                                                                                                                                                                                                                                                                                                                                                                                                                                                                                                                                                                                                                                                                                                                                                                                                                                                                                                                                                                                                                                                                                                                                                                                                                   |
| <b>Pelvic inflammatory disease</b> | 614 Inflammatory disease of ovary, fallopian tube, pelvic cellular tissue, and peritoneum | GYN28 (Pelvic Inflammatory Disease), INF04(Chlamydial Infection Except Trachoma or Pneumonia)                                                                                                                                                                                                                                                                                                                                                                                                                                                                                                                                                                                                                                                                                                                                                                                                                                                                                                                                                                                                                                                                                                                                                                                                                                                                                                                                                                                     |
| <b>Hypoglycemia</b>                | 251.2 Hypoglycemia, unspecified                                                           | END08(Hypoglycemia)                                                                                                                                                                                                                                                                                                                                                                                                                                                                                                                                                                                                                                                                                                                                                                                                                                                                                                                                                                                                                                                                                                                                                                                                                                                                                                                                                                                                                                                               |
|                                    | 251.0 Hypoglycemic coma                                                                   |                                                                                                                                                                                                                                                                                                                                                                                                                                                                                                                                                                                                                                                                                                                                                                                                                                                                                                                                                                                                                                                                                                                                                                                                                                                                                                                                                                                                                                                                                   |
|                                    | 251.1 Other specified hypoglycemia                                                        |                                                                                                                                                                                                                                                                                                                                                                                                                                                                                                                                                                                                                                                                                                                                                                                                                                                                                                                                                                                                                                                                                                                                                                                                                                                                                                                                                                                                                                                                                   |
|                                    | 775.0 Syndrome of "infant of a diabetic mother"                                           |                                                                                                                                                                                                                                                                                                                                                                                                                                                                                                                                                                                                                                                                                                                                                                                                                                                                                                                                                                                                                                                                                                                                                                                                                                                                                                                                                                                                                                                                                   |
| <b>Appendicitis (stage 2 or 3)</b> |                                                                                           | NA                                                                                                                                                                                                                                                                                                                                                                                                                                                                                                                                                                                                                                                                                                                                                                                                                                                                                                                                                                                                                                                                                                                                                                                                                                                                                                                                                                                                                                                                                |
| <b>Congenital Syphilis</b>         | 090.9 Congenital syphilis, unspecified                                                    | PED30 (Syphilis: Congenital)                                                                                                                                                                                                                                                                                                                                                                                                                                                                                                                                                                                                                                                                                                                                                                                                                                                                                                                                                                                                                                                                                                                                                                                                                                                                                                                                                                                                                                                      |
| <b>Cardiovascular disease</b>      | 428 Heart failure                                                                         | CVS05(Aortic Stenosis), CVS07(Cardiomyopathies), CVS09(Congestive Heart Failure), CVS10(Coronary Artery Disease Prior Coronary Revascularization), CVS11(Coronary Artery Disease w/o Prior Coronary Revascularization), CVS13(Essential Hypertension, CVS16 Mitral Stenosis), CVS14(Infective Endocarditis), CVS15(Mitral Regurgitation), CVS16(Mitral Stenosis), CVS18(Pericarditis: Chronic), CVS19(Pericarditis: Viral or Traumatic) , CVS83(Other Cardiac Conditions), END07(Hyperthyroidism), END09(Hypothyroidism), END15(Neoplasm: Pheochromocytoma), END16(Primary Amyloidosis), GEN01(Down's Syndrome), HEM03(Anemia: Folic Acid Deficiency), HEM04(Anemia: Hemolytic, HEM05 Anemia: Iron Deficiency), HEM06(Anemia: Sickle Cell, HEM07(Anemia: Thalassemia), HEM08(Anemia: Vitamin B-12 Deficiency), HEM34(Neoplasm, Malignant: Multiple Myeloma), HEM35(Neoplasm, Malignant: Waldenstrom's Macroglobulinemia), HEM36(Polycythemia Vera), HEP12(Pancreatitis, INF23 Rheumatic Fever), INF27(Syphilis: Acquired), MUS32(Muscular Dystrophy), MUS39(Progressive Systemic Sclerosis), MUS40(Rheumatoid Arthritis), PED02(Anomaly: Atrial Septal Defect), PED10(Anomaly: Other Congenital Heart Disease), PED11(Anomaly: Pulmonary Valve Stenosis), PED12(Anomaly: Tetralogy of Fallot), PED14(Anomaly: Transposition of the Great Arteries), PED15(Anomaly: Ventricular Septal Defects), PSY05(Drug Abuse, Dependence, Intoxication: Alcohol), RES15(Pneumonia: Bacterial) |
| <b>Trauma (Head Injury)</b>        |                                                                                           | NA                                                                                                                                                                                                                                                                                                                                                                                                                                                                                                                                                                                                                                                                                                                                                                                                                                                                                                                                                                                                                                                                                                                                                                                                                                                                                                                                                                                                                                                                                |

|                                                      |                                                          |                         |
|------------------------------------------------------|----------------------------------------------------------|-------------------------|
| <b>Rheumatic fever</b>                               | 390 Rheumatic fever without mention of heart involvement | INF23 (Rheumatic fever) |
|                                                      | 391 Rheumatic fever with heart involvement               |                         |
| <b>Monotropic hormone deficiency</b>                 |                                                          | NA                      |
| <b>Foreign Body: Nasopharynx, Throat or Bronchus</b> |                                                          | NA                      |
| <b>Gastritis</b>                                     |                                                          | NA                      |

For peer review only

## Appendix 3. Regression coefficients and significance levels

## Male 1-2 years old

| Variable                                                             | Coefficient | P-value |
|----------------------------------------------------------------------|-------------|---------|
| Intercept                                                            | -4.4619     | <.0001  |
| Age at end of 2012                                                   | -0.1783     | 0.013   |
| Number of ER visits labeled as 'C: Critical': 1+                     | 0.6582      | 0.3476  |
| Number of ER visits labeled as 'A: Acute': 1                         | 0.4812      | 0.0001  |
| Number of ER visits labeled as 'A: Acute': 2+                        | 0.6205      | 0.0099  |
| Number of ER visits labeled as 'U: Urgent but could be deferred': 1  | 0.2002      | 0.02    |
| Number of ER visits labeled as 'U: Urgent but could be deferred': 2+ | 0.4258      | <.0001  |
| Number of ER visits labeled as 'N: Not Urgent': 1+                   | 0.255       | 0.003   |
| Cancer (specialty visit)                                             | 0.5055      | 0.2369  |
| Cancer (hospital admission)                                          | 1.3543      | 0.013   |
| Cardiovascular (drug use)                                            | 1.5456      | 0.008   |
| Cardiovascular (hospital admission)                                  | 0.3149      | 0.3629  |
| Skin (specialty visit)                                               | -0.0047     | 0.9725  |
| Dental Conditions (hospital admission)                               | -0.7102     | 0.3781  |
| Endocrine (specialty visit)                                          | 1.3936      | <.0001  |
| Endocrine (hospital admission or drug use)                           | 0.8038      | 0.0182  |
| Ear, Nose, Throat (specialty visit)                                  | 0.5473      | <.0001  |
| Ear, Nose, Throat (hospital admission)                               | 0.0494      | 0.839   |
| Eye (hospital admission)                                             | -0.2042     | 0.728   |
| Genetic Conditions (hospital admission)                              | -0.285      | 0.6631  |
| Gastrointestinal (specialty visit)                                   | 0.3153      | 0.2036  |
| Gastrointestinal (hospital admission with primary diagnosis)         | 0.3776      | 0.086   |
| Gastrointestinal (hospital admission with secondary diagnosis)       | 0.0525      | 0.8635  |
| Genitourinary (specialty visit)                                      | -0.2778     | 0.3841  |
| Genitourinary (hospital admission)                                   | 0.5299      | 0.0697  |
| Hematological (hospital admission)                                   | 0.7983      | 0.0046  |
| Hepatobiliary (hospital admission)                                   | 0.4004      | 0.5696  |
| Immunologic Disease (hospital admission)                             | 1.0591      | 0.1003  |
| Infectious Disease (hospital admission)                              | 0.6027      | 0.0406  |
| Male Genital (hospital admission)                                    | -0.1114     | 0.8129  |
| Musculoskeletal (hospital admission)                                 | 0.3921      | 0.2235  |
| Neurologic Diseases (drug use)                                       | 0.3671      | 0.4453  |
| Neurologic Diseases (hospital admission)                             | 0.7566      | 0.0106  |
| Nutrition (hospital admission)                                       | -0.0472     | 0.9119  |
| Other Conditions (hospital admission)                                | 0.8184      | 0.0002  |
| Pediatric medical specialty visit                                    | 0.4803      | 0.0005  |
| Neonatal Conditions (hospital admission)                             | -0.0838     | 0.8757  |
| Inappropriate Rx                                                     | -0.0338     | 0.8686  |
| Psychological (hospital admission)                                   | 0.2778      | 0.5749  |

1  
2  
3  
4  
5  
6  
7  
8  
9  
10  
11  
12  
13  
14  
15  
16  
17  
18  
19  
20  
21  
22  
23  
24  
25  
26  
27  
28  
29  
30  
31  
32  
33  
34  
35  
36  
37  
38  
39  
40  
41  
42  
43  
44  
45  
46  
47  
48  
49  
50  
51  
52  
53  
54  
55  
56  
57  
58  
59  
60

|                                                             |         |        |
|-------------------------------------------------------------|---------|--------|
| Respiratory (specialty visit)                               | 0.2825  | 0.4175 |
| Respiratory (drug use)                                      | -0.095  | 0.4871 |
| Respiratory (hospital admission)                            | 0.3919  | 0.0211 |
| Antibiotics Usage (number of Rx): 1                         | 0.0662  | 0.5353 |
| Antibiotics Usage (number of Rx): 2                         | 0.2095  | 0.068  |
| Antibiotics Usage (number of Rx): 3+                        | 0.447   | <.0001 |
| Skin (hospital admission)                                   | 0.4547  | 0.2407 |
| Pediatric surgical specialty visit                          | 0.1926  | 0.187  |
| Trauma (hospital admission)                                 | 0.0413  | 0.9339 |
| Other conditions vs healthy newborns                        | 0.0793  | 0.5959 |
| Abnormal birth weight vs healthy newborns                   | 0.1125  | 0.2604 |
| Low income (exemption variables from AFT/FED and ASA)       | 0.2345  | 0.0045 |
| Disabled (exemption variables from AFT/FED and ASA)         | 0.1821  | 0.5097 |
| Immigrants                                                  | -0.0417 | 0.6379 |
| Mom: Age at delivery 24 and less                            | -0.0979 | 0.5097 |
| Mom: Age at delivery 35-39                                  | 0.0212  | 0.8208 |
| Mom: Age at delivery 40 and over                            | 0.0234  | 0.8733 |
| Mom: Age at delivery NA                                     | 0.1158  | 0.3462 |
| Mom: First delivery                                         | 0.1875  | 0.0263 |
| Mom: C-section                                              | -0.05   | 0.5649 |
| Mom: Number of hospitalizations 1 year prior to delivery 1  | 0.078   | 0.5319 |
| Mom: Number of hospitalizations 1 year prior to delivery 2+ | 0.264   | 0.2263 |
| Mom: Inappropriate prescription during pregnancy (class D)  | 0.2514  | 0.1184 |
| Mom: Inappropriate prescription during pregnancy (class X)  | -0.3009 | 0.193  |
| Mom: >=1 Rx for antibiotic during pregnancy                 | 0.0123  | 0.8801 |
| Mom: Abortion                                               | 0.115   | 0.3047 |
| Mom: Asthma                                                 | 0.1245  | 0.1754 |
| Mom: Cardiovascular disease                                 | 0.263   | 0.0161 |
| Mom: Diabetes                                               | 0.0993  | 0.6942 |
| Mom: Infection                                              | -0.3891 | 0.3948 |
| Mom: Psychological condition                                | 0.00668 | 0.9664 |
| Mom: Bacterial pneumonia                                    | -11.361 | 0.9739 |
| Mom: Hypertension                                           | -11.339 | 0.9689 |

## Male 3-5 years old

| Variable                                                             | Coefficient | P-value |
|----------------------------------------------------------------------|-------------|---------|
| Intercept                                                            | -4.3908     | <.0001  |
| Age at end of 2012                                                   | -0.1851     | <.0001  |
| Number of ER visits labeled as 'C: Critical': 1+                     | -0.0642     | 0.9443  |
| Number of ER visits labeled as 'A: Acute': 1                         | 0.1502      | 0.2516  |
| Number of ER visits labeled as 'A: Acute': 2+                        | 0.2391      | 0.4166  |
| Number of ER visits labeled as 'U: Urgent but could be deferred': 1  | 0.1307      | 0.0589  |
| Number of ER visits labeled as 'U: Urgent but could be deferred': 2+ | 0.2037      | 0.0201  |
| Number of ER visits labeled as 'N: Not Urgent': 1+                   | 0.0885      | 0.272   |
| Cancer (specialty visit)                                             | -0.8693     | 0.1277  |
| Cancer (hospital admission)                                          | 2.2189      | 0.0003  |
| Cardiovascular (drug use)                                            | 0.453       | 0.4879  |
| Cardiovascular (hospital admission)                                  | -0.2452     | 0.6019  |
| Skin (specialty visit)                                               | 0.0923      | 0.3485  |
| Dental Conditions (hospital admission)                               | -0.0628     | 0.9371  |
| Endocrine (specialty visit)                                          | -0.6416     | 0.1776  |
| Endocrine (drug use)                                                 | -1.1204     | 0.1659  |
| Endocrine (hospital admission)                                       | 0.6101      | 0.2156  |
| Ear, Nose, Throat (specialty visit)                                  | 1.524       | <.0001  |
| Ear, Nose, Throat (hospital admission)                               | -0.7479     | <.0001  |
| Eye (hospital admission)                                             | -0.7131     | 0.3525  |
| Genetic Conditions (hospital admission)                              | 0.4159      | 0.5152  |
| Gastrointestinal (specialty visit)                                   | -0.157      | 0.5272  |
| Gastrointestinal (hospital admission with primary diagnosis)         | 0.933       | <.0001  |
| Gastrointestinal (hospital admission with secondary diagnosis)       | 0.00379     | 0.9928  |
| Genitourinary (specialty visit)                                      | 0.1998      | 0.5642  |
| Genitourinary (hospital admission)                                   | 0.2243      | 0.623   |
| Hematological (hospital admission)                                   | 0.2777      | 0.4688  |
| Hepatobiliary (hospital admission)                                   | 0.015       | 0.9882  |
| Immunologic Disease (hospital admission)                             | -0.5462     | 0.6782  |
| Infectious Disease (hospital admission)                              | 0.9351      | 0.0112  |
| Male Genital (hospital admission)                                    | -1.1519     | 0.0347  |
| Musculoskeletal (hospital admission)                                 | -1.1269     | 0.0187  |
| Neurologic Diseases (drug use)                                       | 0.3605      | 0.3631  |
| Neurologic Diseases (hospital admission)                             | 0.803       | 0.0021  |
| Nutrition (hospital admission)                                       | -0.3288     | 0.4881  |
| Neonatal/other condition (hospital admission)                        | 0.9366      | <.0001  |
| Pediatric medical specialty visit                                    | 0.1763      | 0.2109  |
| Inappropriate Rx                                                     | -0.1163     | 0.3507  |
| Psychological (hospital admission)                                   | -0.1213     | 0.7529  |

1  
2  
3  
4  
5  
6  
7  
8  
9  
10  
11  
12  
13  
14  
15  
16  
17  
18  
19  
20  
21  
22  
23  
24  
25  
26  
27  
28  
29  
30  
31  
32  
33  
34  
35  
36  
37  
38  
39  
40  
41  
42  
43  
44  
45  
46  
47  
48  
49  
50  
51  
52  
53  
54  
55  
56  
57  
58  
59  
60

|                                                                         |         |        |
|-------------------------------------------------------------------------|---------|--------|
| Respiratory (specialty visit)                                           | 0.6986  | 0.0002 |
| Respiratory (drug use)                                                  | -0.0033 | 0.9767 |
| Respiratory (hospital admission)                                        | 0.6469  | 0.001  |
| Antibiotics Usage (number of Rx): 1                                     | 0.3154  | 0.0009 |
| Antibiotics Usage (number of Rx): 2                                     | 0.4605  | <.0001 |
| Antibiotics Usage (number of Rx): 3+                                    | 0.8373  | <.0001 |
| Skin (hospital admission)                                               | -0.8752 | 0.2465 |
| Pediatric surgical specialty visit                                      | 0.1381  | 0.3299 |
| Trauma (hospital admission)                                             | -12.786 | 0.9467 |
| Other conditions vs healthy newborns                                    | 0.0693  | 0.692  |
| Abnormal birth weight vs healthy newborns                               | -0.1385 | 0.1889 |
| Low income (exemption variables from AFT/FED and ASA)                   | 0.1382  | 0.0352 |
| Disabled (exemption variables from AFT/FED and ASA)                     | -0.0398 | 0.8437 |
| Immigrant                                                               | -0.1255 | 0.1239 |
| Mom: Age at delivery 24 and less                                        | 0.092   | 0.4172 |
| Mom: Age at delivery 35-39                                              | -0.0953 | 0.1981 |
| Mom: Age at delivery 40 and over                                        | -0.1726 | 0.1823 |
| Mom: Age at delivery NA                                                 | 0.00579 | 0.9547 |
| Mom: First delivery                                                     | 0.0862  | 0.2102 |
| Mom: C-section                                                          | 0.064   | 0.3488 |
| Mom: Number of hospitalizations 1 year prior to delivery 1              | 0.1719  | 0.0713 |
| Mom: Number of hospitalizations 1 year prior to delivery 2+             | 0.4186  | 0.0092 |
| Mom: Inappropriate prescription during pregnancy (class D)              | 0.345   | 0.0015 |
| Mom: Inappropriate prescription during pregnancy (class X)              | -0.1565 | 0.4248 |
| Mom: >=1 Rx for antibiotic during pregnancy                             | 0.0643  | 0.3298 |
| Mom: Abortion                                                           | 0.0611  | 0.5114 |
| Mom: Asthma                                                             | -0.067  | 0.4507 |
| Mom: Cardiovascular disease                                             | 0.0794  | 0.4534 |
| Mom: Diabetes                                                           | 0.2278  | 0.3482 |
| Mom: Infection                                                          | -0.3829 | 0.5266 |
| Mom: Psychological condition                                            | 0.0282  | 0.8502 |
| Mom: Hypertension                                                       | -12.352 | 0.9701 |
| History: Cancer (hospital admission)                                    | -0.0872 | 0.9335 |
| History: Cardiovascular (hospital admission)                            | -1.7855 | 0.0597 |
| History: Dental Conditions (hospital admission)                         | 0.1191  | 0.4171 |
| History: Endocrine (hospital admission)                                 | 0.2455  | 0.4269 |
| History: Ear, Nose, Throat (hospital admission)                         | 0.2496  | 0.2975 |
| History: Eye (hospital admission)                                       | -0.088  | 0.4598 |
| History: Genetic Conditions (hospital admission)                        | -0.1924 | 0.5286 |
| History: Gastrointestinal (hospital admission with primary diagnosis)   | -0.1531 | 0.6886 |
| History: Gastrointestinal (hospital admission with secondary diagnosis) | 0.2482  | 0.0296 |

|    |                                                                               |         |        |
|----|-------------------------------------------------------------------------------|---------|--------|
| 1  |                                                                               |         |        |
| 2  |                                                                               |         |        |
| 3  | History: Genitourinary (hospital admission)                                   | -0.0753 | 0.6449 |
| 4  | History: Hematological (hospital admission)                                   | -0.2199 | 0.3188 |
| 5  | History: Hepatobiliary (hospital admission)                                   | 0.4456  | 0.1529 |
| 6  | History: Immunologic Disease (hospital admission)                             | 0.4059  | 0.3341 |
| 7  | History: Infectious Disease (hospital admission)                              | 0.0303  | 0.8035 |
| 8  | History: Male Genital (hospital admission)                                    | -0.263  | 0.2335 |
| 9  | History: Musculoskeletal (hospital admission)                                 | -0.4993 | 0.0254 |
| 10 | History: Neurologic Diseases (hospital admission)                             | 0.2836  | 0.1162 |
| 11 | History: Nutrition (hospital admission)                                       | 0.4121  | 0.0231 |
| 12 | History: Other Conditions (hospital admission)                                | 0.4624  | 0.0793 |
| 13 | History: Neonatal Conditions (hospital admission)                             | -0.0783 | 0.5494 |
| 14 | History: Psychological (hospital admission)                                   | 0.0445  | 0.8625 |
| 15 | History: Respiratory (hospital admission)                                     | 0.0854  | 0.3347 |
| 16 | History: Skin (hospital admission)                                            | 0.0851  | 0.7052 |
| 17 | History: Trauma (hospital admission)                                          | -0.0237 | 0.9288 |
| 18 | History: Skin (specialty visit)                                               | 0.1423  | 0.0518 |
| 19 | History: Pediatric surgical specialty visit                                   | 0.00376 | 0.9665 |
| 20 | History: Gastrointestinal (specialty visit)                                   | 0.2392  | 0.1128 |
| 21 | History: Endocrine (specialty visit)                                          | 0.0858  | 0.7584 |
| 22 | History: Genitourinary (specialty visit)                                      | 0.1166  | 0.671  |
| 23 | History: Cancer (specialty visit)                                             | 0.1478  | 0.6408 |
| 24 | History: Ear, Nose, Throat (specialty visit)                                  | 0.5316  | <.0001 |
| 25 | History: Pediatric medical specialty visit                                    | 0.0864  | 0.1887 |
| 26 | History: Respiratory (specialty visit)                                        | 0.5207  | 0.0064 |
| 27 | History: Cardiovascular (drug use)                                            | 0.0362  | 0.9379 |
| 28 | History: Respiratory (drug use)                                               | -0.3478 | <.0001 |
| 29 | History: Endocrine (drug use)                                                 | 0.6752  | 0.3485 |
| 30 | History: Neurologic Diseases (drug use)                                       | 0.4141  | 0.334  |
| 31 | History: Inappropriate Rx                                                     | 0.00895 | 0.9274 |
| 32 | History: Antibiotics Usage (number of years history)                          | 0.0111  | 0.705  |
| 33 | History: Number of ER visits labeled as 'C: Critical': 1+                     | 0.6068  | 0.0612 |
| 34 | History: Number of ER visits labeled as 'A: Acute': 1                         | 0.0277  | 0.7708 |
| 35 | History: Number of ER visits labeled as 'A: Acute': 2+                        | 0.0285  | 0.8146 |
| 36 | History: Number of ER visits labeled as 'U: Urgent but could be deferred': 1  | 0.1429  | 0.0952 |
| 37 | History: Number of ER visits labeled as 'U: Urgent but could be deferred': 2+ | 0.0699  | 0.337  |
| 38 | History: Number of ER visits labeled as 'N: Not Urgent': 1+                   | -0.0249 | 0.6872 |
| 39 |                                                                               |         |        |
| 40 |                                                                               |         |        |
| 41 |                                                                               |         |        |
| 42 |                                                                               |         |        |
| 43 |                                                                               |         |        |
| 44 |                                                                               |         |        |
| 45 |                                                                               |         |        |
| 46 |                                                                               |         |        |
| 47 |                                                                               |         |        |
| 48 |                                                                               |         |        |
| 49 |                                                                               |         |        |
| 50 |                                                                               |         |        |
| 51 |                                                                               |         |        |
| 52 |                                                                               |         |        |
| 53 |                                                                               |         |        |
| 54 |                                                                               |         |        |
| 55 |                                                                               |         |        |
| 56 |                                                                               |         |        |
| 57 |                                                                               |         |        |
| 58 |                                                                               |         |        |
| 59 |                                                                               |         |        |
| 60 |                                                                               |         |        |



## Male 6-13 years old

| Variable                                                             | Coefficient | P-value |
|----------------------------------------------------------------------|-------------|---------|
| Intercept                                                            | -5.0608     | <.0001  |
| Age at end of 2012                                                   | -0.0988     | <.0001  |
| Number of ER visits labeled as 'C: Critical': 1+                     | 0.5905      | 0.397   |
| Number of ER visits labeled as 'A: Acute': 1                         | 0.254       | 0.09    |
| Number of ER visits labeled as 'A: Acute': 2+                        | -0.4226     | 0.3826  |
| Number of ER visits labeled as 'U: Urgent but could be deferred': 1  | 0.1963      | 0.0093  |
| Number of ER visits labeled as 'U: Urgent but could be deferred': 2+ | 0.3353      | 0.002   |
| Number of ER visits labeled as 'N: Not Urgent': 1+                   | 0.0694      | 0.4921  |
| Cancer (specialty visit)                                             | 0.0895      | 0.8435  |
| Cancer (hospital admission)                                          | 1.0735      | 0.0669  |
| Cardiovascular (drug use)                                            | -0.0648     | 0.8959  |
| Cardiovascular (hospital admission)                                  | 0.251       | 0.5673  |
| Skin (specialty visit)                                               | -0.1038     | 0.3095  |
| Dental Conditions (hospital admission)                               | 0.6784      | 0.1429  |
| Endocrine (specialty visit)                                          | 0.5         | 0.0384  |
| Endocrine (drug use)                                                 | -0.5023     | 0.4691  |
| Endocrine (hospital admission)                                       | 0.2352      | 0.6721  |
| Ear, Nose, Throat (specialty visit)                                  | 1.3841      | <.0001  |
| Ear, Nose, Throat (hospital admission)                               | -1.0555     | 0.0003  |
| Eye (hospital admission)                                             | -0.7516     | 0.343   |
| Genetic Conditions (hospital admission)                              | -0.2224     | 0.7612  |
| Gastrointestinal (specialty visit)                                   | -0.0155     | 0.9528  |
| Gastrointestinal (hospital admission with primary diagnosis)         | 1.0092      | 0.0004  |
| Gastrointestinal (hospital admission with secondary diagnosis)       | 0.2371      | 0.5723  |
| Genitourinary (specialty visit)                                      | -0.199      | 0.5697  |
| Genitourinary (hospital admission)                                   | 0.9503      | 0.0159  |
| Hematological (hospital admission)                                   | 0.4117      | 0.2535  |
| Hepatobiliary (hospital admission)                                   | -1.0456     | 0.4125  |
| Immunologic Disease (hospital admission)                             | 0.5324      | 0.6289  |
| Infectious Disease (hospital admission)                              | 0.7537      | 0.0819  |
| Male Genital (hospital admission)                                    | -0.0609     | 0.8806  |
| Musculoskeletal (hospital admission)                                 | -0.497      | 0.1098  |
| Neurologic Diseases (drug use)                                       | 0.7414      | 0.0279  |
| Neurologic Diseases (hospital admission)                             | 0.9324      | <.0001  |
| Nutrition (hospital admission)                                       | 0.1509      | 0.7591  |
| Neonatal/other condition (hospital admission)                        | 0.4672      | 0.1678  |
| Pediatric medical specialty visit                                    | 0.0984      | 0.5306  |
| Inappropriate Rx                                                     | 0.3362      | 0.1756  |
| Psychological (hospital admission)                                   | 0.0188      | 0.9642  |

1  
2  
3  
4  
5  
6  
7  
8  
9  
10  
11  
12  
13  
14  
15  
16  
17  
18  
19  
20  
21  
22  
23  
24  
25  
26  
27  
28  
29  
30  
31  
32  
33  
34  
35  
36  
37  
38  
39  
40  
41  
42  
43  
44  
45  
46  
47  
48  
49  
50  
51  
52  
53  
54  
55  
56  
57  
58  
59  
60

|                                                                         |         |        |
|-------------------------------------------------------------------------|---------|--------|
| Respiratory (specialty visit)                                           | 0.4092  | 0.0829 |
| Respiratory (drug use)                                                  | -0.0899 | 0.5566 |
| Respiratory (hospital admission)                                        | 0.6178  | 0.0156 |
| Antibiotics Usage (number of Rx): 1                                     | 0.1123  | 0.1765 |
| Antibiotics Usage (number of Rx): 2                                     | 0.2957  | 0.0022 |
| Antibiotics Usage (number of Rx): 3+                                    | 0.6045  | <.0001 |
| Skin (hospital admission)                                               | 0.3592  | 0.4646 |
| Pediatric surgical specialty visit                                      | -0.2561 | 0.1962 |
| Trauma (hospital admission)                                             | 0.2288  | 0.6719 |
| Low income (exemption variables from AFT/FED and ASA)                   | 0.1108  | 0.0876 |
| Disabled (exemption variables from AFT/FED and ASA)                     | 0.0562  | 0.7407 |
| Immigrant                                                               | 0.1941  | 0.0171 |
| History: Cancer (hospital admission)                                    | -0.1893 | 0.7004 |
| History: Cardiovascular (hospital admission)                            | -0.331  | 0.2351 |
| History: Dental Conditions (hospital admission)                         | 0.0863  | 0.7781 |
| History: Endocrine (hospital admission)                                 | 0.1744  | 0.549  |
| History: Ear, Nose, Throat (hospital admission)                         | -0.0818 | 0.4303 |
| History: Eye (hospital admission)                                       | -0.0877 | 0.7598 |
| History: Genetic Conditions (hospital admission)                        | 0.2786  | 0.3979 |
| History: Gastrointestinal (hospital admission with primary diagnosis)   | 0.0912  | 0.5373 |
| History: Gastrointestinal (hospital admission with secondary diagnosis) | -0.2858 | 0.2282 |
| History: Genitourinary (hospital admission)                             | 0.1141  | 0.6252 |
| History: Hematological (hospital admission)                             | 0.2059  | 0.3073 |
| History: Hepatobiliary (hospital admission)                             | 0.7768  | 0.0281 |
| History: Immunologic Disease (hospital admission)                       | -0.7195 | 0.3302 |
| History: Infectious Disease (hospital admission)                        | 0.1183  | 0.6089 |
| History: Male Genital (hospital admission)                              | -0.192  | 0.287  |
| History: Musculoskeletal (hospital admission)                           | 0.1894  | 0.1981 |
| History: Neurologic Diseases (hospital admission)                       | 0.5886  | 0.0002 |
| History: Nutrition (hospital admission)                                 | 0.2161  | 0.3529 |
| History: Other Conditions (hospital admission)                          | 0.3105  | 0.2424 |
| History: Neonatal Conditions (hospital admission)                       | -0.3908 | 0.6064 |
| History: Psychological (hospital admission)                             | 0.0745  | 0.7265 |
| History: Respiratory (hospital admission)                               | 0.3742  | 0.0029 |
| History: Skin (hospital admission)                                      | 0.1594  | 0.5364 |
| History: Trauma (hospital admission)                                    | -0.2875 | 0.3379 |
| History: Skin (specialty visit)                                         | 0.00041 | 0.9953 |
| History: Pediatric surgical specialty visit                             | 0.0781  | 0.3987 |
| History: Gastrointestinal (specialty visit)                             | -0.1624 | 0.4098 |
| History: Endocrine (specialty visit)                                    | -0.1416 | 0.5324 |
| History: Genitourinary (specialty visit)                                | 0.1667  | 0.5171 |

1  
2  
3  
4  
5  
6  
7  
8  
9  
10  
11  
12  
13  
14  
15  
16  
17  
18  
19  
20  
21  
22  
23  
24  
25  
26  
27  
28  
29  
30  
31  
32  
33  
34  
35  
36  
37  
38  
39  
40  
41  
42  
43  
44  
45  
46  
47  
48  
49  
50  
51  
52  
53  
54  
55  
56  
57  
58  
59  
60

|                                                                               |         |        |
|-------------------------------------------------------------------------------|---------|--------|
| History: Cancer (specialty visit)                                             | 0.5712  | 0.0242 |
| History: Ear, Nose, Throat (specialty visit)                                  | 0.3662  | <.0001 |
| History: Pediatric medical specialty visit                                    | 0.1406  | 0.0412 |
| History: Respiratory (specialty visit)                                        | 0.2227  | 0.2056 |
| History: Cardiovascular (drug use)                                            | 0.4739  | 0.2013 |
| History: Respiratory (drug use)                                               | -0.1722 | 0.0587 |
| History: Endocrine (drug use)                                                 | 0.1974  | 0.7629 |
| History: Neurologic Diseases (drug use)                                       | 0.0465  | 0.8891 |
| History: Inappropriate Rx                                                     | -0.0067 | 0.9478 |
| History: Antibiotics Usage (number of years history)                          | 0.0642  | 0.0063 |
| History: Number of ER visits labeled as 'C: Critical': 1+                     | -0.113  | 0.8007 |
| History: Number of ER visits labeled as 'A: Acute': 1                         | -0.1029 | 0.3904 |
| History: Number of ER visits labeled as 'A: Acute': 2+                        | 0.0835  | 0.5636 |
| History: Number of ER visits labeled as 'U: Urgent but could be deferred': 1  | 0.1123  | 0.1878 |
| History: Number of ER visits labeled as 'U: Urgent but could be deferred': 2+ | 0.1706  | 0.019  |
| History: Number of ER visits labeled as 'N: Not Urgent': 1+                   | 0.0356  | 0.6004 |

Peer review only

## Female 1-2 years old

| Variable                                                             | Coefficient | P-value |
|----------------------------------------------------------------------|-------------|---------|
| Intercept                                                            | -4.5571     | <.0001  |
| Age at end of 2012                                                   | -0.2066     | 0.0083  |
| Number of ER visits labeled as 'C: Critical': 1+                     | 0.9244      | 0.1671  |
| Number of ER visits labeled as 'A: Acute': 1                         | 0.1969      | 0.2132  |
| Number of ER visits labeled as 'A: Acute': 2+                        | 0.7359      | 0.0083  |
| Number of ER visits labeled as 'U: Urgent but could be deferred': 1  | 0.4261      | <.0001  |
| Number of ER visits labeled as 'U: Urgent but could be deferred': 2+ | 0.4671      | <.0001  |
| Number of ER visits labeled as 'N: Not Urgent': 1+                   | 0.0731      | 0.4675  |
| Cancer (specialty visit)                                             | -0.1589     | 0.8328  |
| Cancer (hospital admission)                                          | 2.161       | 0.0004  |
| Cardiovascular (drug use)                                            | 0.5362      | 0.4646  |
| Cardiovascular (hospital admission)                                  | 0.8576      | 0.0182  |
| Skin (specialty visit)                                               | 0.184       | 0.1983  |
| Dental Conditions (hospital admission)                               | -0.9622     | 0.3726  |
| Endocrine (specialty visit)                                          | -0.3798     | 0.5293  |
| Endocrine (hospital admission or drug use)                           | 0.3949      | 0.3608  |
| Ear, Nose, Throat (specialty visit)                                  | 0.6081      | 0.0002  |
| Ear, Nose, Throat (hospital admission)                               | 0.4674      | 0.08    |
| Eye (hospital admission)                                             | 0.431       | 0.4151  |
| Genetic Conditions (hospital admission)                              | 1.0638      | 0.074   |
| Gastrointestinal (specialty visit)                                   | -0.1407     | 0.6559  |
| Gastrointestinal (hospital admission with primary diagnosis)         | 0.3972      | 0.1327  |
| Gastrointestinal (hospital admission with secondary diagnosis)       | 0.2011      | 0.5735  |
| Genitourinary (specialty visit)                                      | 0.0847      | 0.8286  |
| Genitourinary (hospital admission)                                   | 0.0645      | 0.891   |
| OB/GYN (hospital admission)                                          | -11.007     | 0.9775  |
| Hematological (hospital admission)                                   | -0.1244     | 0.7917  |
| Hepatobiliary (hospital admission)                                   | -11.698     | 0.9635  |
| Infectious Disease (hospital admission)                              | 0.5415      | 0.1206  |
| Musculoskeletal (hospital admission)                                 | 0.3153      | 0.3954  |
| Neurologic Diseases (drug use)                                       | 1.9836      | <.0001  |
| Neurologic Diseases (hospital admission)                             | -0.0008     | 0.9983  |
| Nutrition (hospital admission)                                       | 0.4527      | 0.2304  |
| Other Conditions (hospital admission)                                | 0.694       | 0.0125  |
| Pediatric medical specialty visit                                    | 0.4988      | 0.0017  |
| Neonatal Conditions (hospital admission)                             | -0.1669     | 0.7809  |
| Inappropriate Rx                                                     | 0.2409      | 0.2714  |
| Psychological (hospital admission)                                   | 0.7913      | 0.1063  |
| Respiratory (specialty visit)                                        | 0.0595      | 0.9006  |

1  
2  
3  
4  
5  
6  
7  
8  
9  
10  
11  
12  
13  
14  
15  
16  
17  
18  
19  
20  
21  
22  
23  
24  
25  
26  
27  
28  
29  
30  
31  
32  
33  
34  
35  
36  
37  
38  
39  
40  
41  
42  
43  
44  
45  
46  
47  
48  
49  
50  
51  
52  
53  
54  
55  
56  
57  
58  
59  
60

|                                                             |         |        |
|-------------------------------------------------------------|---------|--------|
| Respiratory (drug use)                                      | 0.1825  | 0.2547 |
| Respiratory (hospital admission)                            | 0.5431  | 0.0032 |
| Antibiotics Usage (number of Rx): 1                         | 0.1048  | 0.3403 |
| Antibiotics Usage (number of Rx): 2                         | 0.3254  | 0.0059 |
| Antibiotics Usage (number of Rx): 3+                        | 0.2723  | 0.0176 |
| Skin (hospital admission)                                   | 0.5242  | 0.2614 |
| Pediatric surgical specialty visit                          | 0.0184  | 0.9507 |
| Trauma (hospital admission)                                 | -1.3538 | 0.2004 |
| Other conditions vs healthy newborns                        | 0.3338  | 0.0187 |
| Abnormal birth weight vs healthy newborns                   | -0.1441 | 0.2722 |
| Low income (exemption variables from AFT/FED and ASA)       | 0.1929  | 0.0307 |
| Disabled (exemption variables from AFT/FED and ASA)         | 0.2458  | 0.3869 |
| Immigrant                                                   | 0.1709  | 0.068  |
| Mom: Age at delivery 24 and less                            | -0.0148 | 0.9227 |
| Mom: Age at delivery 35-39                                  | -0.0742 | 0.4664 |
| Mom: Age at delivery 40 and over                            | -0.1103 | 0.502  |
| Mom: Age at delivery NA                                     | 0.091   | 0.503  |
| Mom: First delivery                                         | 0.2184  | 0.0176 |
| Mom: C-section                                              | 0.1219  | 0.1914 |
| Mom: Number of hospitalizations 1 year prior to delivery 1  | 0.0709  | 0.6003 |
| Mom: Number of hospitalizations 1 year prior to delivery 2+ | 0.2905  | 0.1941 |
| Mom: Inappropriate prescription during pregnancy (class D)  | -0.1674 | 0.4037 |
| Mom: Inappropriate prescription during pregnancy (class X)  | 0.086   | 0.6881 |
| Mom: >=1 Rx for antibiotic during pregnancy                 | 0.0725  | 0.4081 |
| Mom: Abortion                                               | 0.1205  | 0.3247 |
| Mom: Asthma                                                 | 0.2316  | 0.0176 |
| Mom: Cardiovascular disease                                 | -0.1599 | 0.2254 |
| Mom: Diabetes                                               | 0.4683  | 0.0481 |
| Mom: Infection                                              | 0.4508  | 0.1694 |
| Mom: Psychological condition                                | 0.3314  | 0.0323 |
| Mom: Bacterial pneumonia                                    | 0.5788  | 0.4408 |
| Mom: Hypertension                                           | 0.6761  | 0.5213 |

## Female 3-5 years old

| Variable                                                             | Coefficient | P-value |
|----------------------------------------------------------------------|-------------|---------|
| Intercept                                                            | -4.6056     | <.0001  |
| Age at end of 2012                                                   | -0.2234     | <.0001  |
| Number of ER visits labeled as 'C: Critical': 1+                     | 1.5291      | 0.0242  |
| Number of ER visits labeled as 'A: Acute': 1                         | 0.2541      | 0.1171  |
| Number of ER visits labeled as 'A: Acute': 2+                        | 0.5921      | 0.0611  |
| Number of ER visits labeled as 'U: Urgent but could be deferred': 1  | 0.1159      | 0.1775  |
| Number of ER visits labeled as 'U: Urgent but could be deferred': 2+ | 0.3232      | 0.0037  |
| Number of ER visits labeled as 'N: Not Urgent': 1+                   | 0.0931      | 0.3538  |
| Cancer (specialty visit)                                             | -0.7706     | 0.35    |
| Cancer (hospital admission)                                          | -0.1399     | 0.9057  |
| Cardiovascular (drug use)                                            | -0.3416     | 0.7265  |
| Cardiovascular (hospital admission)                                  | 0.4549      | 0.3553  |
| Skin (specialty visit)                                               | -0.1928     | 0.144   |
| Dental Conditions (hospital admission)                               | 0.3988      | 0.579   |
| Endocrine (specialty visit)                                          | 0.481       | 0.2104  |
| Endocrine (drug use)                                                 | 0.1423      | 0.8601  |
| Endocrine (hospital admission)                                       | 0.6761      | 0.1341  |
| Ear, Nose, Throat (specialty visit)                                  | 1.5774      | <.0001  |
| Ear, Nose, Throat (hospital admission)                               | -0.3541     | 0.1076  |
| Eye (hospital admission)                                             | -0.5433     | 0.5958  |
| Genetic Conditions (hospital admission)                              | -0.7183     | 0.3049  |
| Gastrointestinal (specialty visit)                                   | -0.1286     | 0.6569  |
| Gastrointestinal (hospital admission with primary diagnosis)         | 0.4361      | 0.1608  |
| Gastrointestinal (hospital admission with secondary diagnosis)       | -0.1194     | 0.7893  |
| Genitourinary (specialty visit)                                      | -0.5411     | 0.3296  |
| Genitourinary (hospital admission)                                   | 2.1019      | <.0001  |
| OB/GYN (hospital admission)                                          | -12.569     | 0.9572  |
| Hematological (hospital admission)                                   | 0.0931      | 0.8231  |
| Hepatobiliary (hospital admission)                                   | -0.7794     | 0.5574  |
| Immunologic Disease (hospital admission)                             | -0.6438     | 0.5935  |
| Infectious Disease (hospital admission)                              | 0.8241      | 0.0627  |
| Musculoskeletal (hospital admission)                                 | 0.1936      | 0.6165  |
| Neurologic Diseases (drug use)                                       | 0.1575      | 0.7742  |
| Neurologic Diseases (hospital admission)                             | 0.5916      | 0.0909  |
| Nutrition (hospital admission)                                       | 0.7261      | 0.092   |
| Neonatal/other condition (hospital admission)                        | 0.7359      | 0.024   |
| Pediatric medical specialty visit                                    | 0.1741      | 0.3278  |
| Inappropriate Rx                                                     | 0.1276      | 0.415   |
| Psychological (hospital admission)                                   | -0.911      | 0.2026  |

1  
2  
3  
4  
5  
6  
7  
8  
9  
10  
11  
12  
13  
14  
15  
16  
17  
18  
19  
20  
21  
22  
23  
24  
25  
26  
27  
28  
29  
30  
31  
32  
33  
34  
35  
36  
37  
38  
39  
40  
41  
42  
43  
44  
45  
46  
47  
48  
49  
50  
51  
52  
53  
54  
55  
56  
57  
58  
59  
60

|                                                                       |         |        |
|-----------------------------------------------------------------------|---------|--------|
| Respiratory (specialty visit)                                         | 0.7151  | 0.0078 |
| Respiratory (drug use)                                                | -0.2092 | 0.1685 |
| Respiratory (hospital admission)                                      | 0.9109  | <.0001 |
| Antibiotics Usage (number of Rx): 1                                   | 0.00781 | 0.9441 |
| Antibiotics Usage (number of Rx): 2                                   | 0.2729  | 0.0175 |
| Antibiotics Usage (number of Rx): 3+                                  | 0.5587  | <.0001 |
| Skin (hospital admission)                                             | 0.4143  | 0.5171 |
| Pediatric surgical specialty visit                                    | -0.3071 | 0.417  |
| Trauma (hospital admission)                                           | 0.6426  | 0.2586 |
| Other conditions vs healthy newborns                                  | -0.0286 | 0.8313 |
| Abnormal birth weight vs healthy newborns                             | 0.0403  | 0.8428 |
| Low income (exemption variables from AFT/FED and ASA)                 | 0.1281  | 0.1019 |
| Disabled (exemption variables from AFT/FED and ASA)                   | -0.2122 | 0.4469 |
| Immigrant                                                             | -0.1857 | 0.058  |
| Mom: Age at delivery 24 and less                                      | 0.4048  | 0.0012 |
| Mom: Age at delivery 35-39                                            | 0.0281  | 0.7534 |
| Mom: Age at delivery 40 and over                                      | -0.1245 | 0.4175 |
| Mom: Age at delivery NA                                               | 0.3277  | 0.0081 |
| Mom: First delivery                                                   | 0.2424  | 0.0043 |
| Mom: C-section                                                        | 0.0588  | 0.4802 |
| Mom: Number of hospitalizations 1 year prior to delivery 1            | 0.1992  | 0.0751 |
| Mom: Number of hospitalizations 1 year prior to delivery 2+           | 0.1744  | 0.3781 |
| Mom: Inappropriate prescription during pregnancy (class D)            | 0.00365 | 0.9796 |
| Mom: Inappropriate prescription during pregnancy (class X)            | -0.18   | 0.4421 |
| Mom: >=1 Rx for antibiotic during pregnancy                           | 0.1996  | 0.0109 |
| Mom: Abortion                                                         | 0.0806  | 0.4681 |
| Mom: Asthma                                                           | 0.03    | 0.7731 |
| Mom: Cardiovascular disease                                           | 0.0892  | 0.4937 |
| Mom: Diabetes                                                         | 0.3871  | 0.1656 |
| Mom: Infection                                                        | 0.0938  | 0.8747 |
| Mom: Psychological condition                                          | 0.1887  | 0.2588 |
| Mom: Bacterial Pneumonia                                              | -1.0059 | 0.468  |
| Mom: Hypertension                                                     | 0.9258  | 0.2283 |
| History: Cancer (hospital admission)                                  | -0.7613 | 0.4968 |
| History: Cardiovascular (hospital admission)                          | -0.1357 | 0.4844 |
| History: Dental Conditions (hospital admission)                       | -0.0641 | 0.8721 |
| History: Endocrine (hospital admission)                               | -0.321  | 0.3353 |
| History: Ear, Nose, Throat (hospital admission)                       | 0.1229  | 0.4029 |
| History: Eye (hospital admission)                                     | -0.0508 | 0.8818 |
| History: Genetic Conditions (hospital admission)                      | 0.799   | 0.0191 |
| History: Gastrointestinal (hospital admission with primary diagnosis) | 0.1729  | 0.2373 |

|    |                                                                               |         |        |
|----|-------------------------------------------------------------------------------|---------|--------|
| 1  |                                                                               |         |        |
| 2  |                                                                               |         |        |
| 3  |                                                                               |         |        |
| 4  | History: Gastrointestinal (hospital admission with secondary diagnosis)       | -0.1618 | 0.4496 |
| 5  | History: Genitourinary (hospital admission)                                   | 0.1015  | 0.677  |
| 6  | History: OB/GYN (hospital admission)                                          | -0.0352 | 0.9506 |
| 7  | History: Hematological (hospital admission)                                   | 0.3412  | 0.1549 |
| 8  | History: Hepatobiliary (hospital admission)                                   | 0.5836  | 0.1771 |
| 9  |                                                                               |         |        |
| 10 | History: Immunologic Disease (hospital admission)                             | 0.1294  | 0.815  |
| 11 | History: Infectious Disease (hospital admission)                              | -0.3508 | 0.0383 |
| 12 | History: Musculoskeletal (hospital admission)                                 | 0.1377  | 0.5135 |
| 13 | History: Neurologic Diseases (hospital admission)                             | 0.1388  | 0.5723 |
| 14 | History: Nutrition (hospital admission)                                       | 0.1641  | 0.4831 |
| 15 | History: Other Conditions (hospital admission)                                | 0.6846  | 0.0305 |
| 16 | History: Neonatal Conditions (hospital admission)                             | 0.1031  | 0.5163 |
| 17 | History: Psychological (hospital admission)                                   | -0.3948 | 0.2789 |
| 18 | History: Respiratory (hospital admission)                                     | 0.2487  | 0.0197 |
| 19 | History: Skin (hospital admission)                                            | 0.1305  | 0.5923 |
| 20 | History: Trauma (hospital admission)                                          | 0.6773  | 0.0161 |
| 21 | History: Skin (specialty visit)                                               | 0.1008  | 0.2576 |
| 22 | History: Pediatric surgical specialty visit                                   | -0.1367 | 0.4052 |
| 23 | History: Gastrointestinal (specialty visit)                                   | -0.0783 | 0.7024 |
| 24 | History: Endocrine (specialty visit)                                          | -0.501  | 0.1488 |
| 25 | History: Genitourinary (specialty visit)                                      | -0.4215 | 0.3296 |
| 26 | History: Cancer (specialty visit)                                             | 0.1303  | 0.736  |
| 27 | History: Ear, Nose, Throat (specialty visit)                                  | 0.5018  | <.0001 |
| 28 | History: Pediatric medical specialty visit                                    | 0.0626  | 0.4364 |
| 29 | History: Respiratory (specialty visit)                                        | -0.6453 | 0.0757 |
| 30 | History: Cardiovascular (drug use)                                            | 0.3177  | 0.5455 |
| 31 | History: Respiratory (drug use)                                               | 0.1378  | 0.1819 |
| 32 | History: Endocrine (drug use)                                                 | 0.1246  | 0.8816 |
| 33 | History: Neurologic Diseases (drug use)                                       | 1.0076  | 0.0729 |
| 34 | History: Inappropriate Rx                                                     | 0.0338  | 0.7872 |
| 35 | History: Antibiotics Usage (number of years history)                          | 0.0117  | 0.7383 |
| 36 | History: Number of ER visits labeled as 'C: Critical': 1+                     | -0.183  | 0.752  |
| 37 | History: Number of ER visits labeled as 'A: Acute': 1                         | 0.0778  | 0.5103 |
| 38 | History: Number of ER visits labeled as 'A: Acute': 2+                        | -0.1193 | 0.4529 |
| 39 | History: Number of ER visits labeled as 'U: Urgent but could be deferred': 1  | 0.0555  | 0.5856 |
| 40 | History: Number of ER visits labeled as 'U: Urgent but could be deferred': 2+ | 0.1819  | 0.031  |
| 41 | History: Number of ER visits labeled as 'N: Not Urgent': 1+                   | -0.0098 | 0.8966 |
| 42 |                                                                               |         |        |
| 43 |                                                                               |         |        |
| 44 |                                                                               |         |        |
| 45 |                                                                               |         |        |
| 46 |                                                                               |         |        |
| 47 |                                                                               |         |        |
| 48 |                                                                               |         |        |
| 49 |                                                                               |         |        |
| 50 |                                                                               |         |        |
| 51 |                                                                               |         |        |
| 52 |                                                                               |         |        |
| 53 |                                                                               |         |        |
| 54 |                                                                               |         |        |
| 55 |                                                                               |         |        |
| 56 |                                                                               |         |        |
| 57 |                                                                               |         |        |
| 58 |                                                                               |         |        |
| 59 |                                                                               |         |        |
| 60 |                                                                               |         |        |



## Female 6-13 years old

| Variable                                                             | Coefficient | P-value |
|----------------------------------------------------------------------|-------------|---------|
| Intercept                                                            | -5.8784     | <.0001  |
| Age at end of 2012                                                   | -0.0548     | 0.0008  |
| Number of ER visits labeled as 'C: Critical': 1+                     | 0.5528      | 0.4286  |
| Number of ER visits labeled as 'A: Acute': 1                         | 0.5618      | 0.0007  |
| Number of ER visits labeled as 'A: Acute': 2+                        | 0.8879      | 0.0091  |
| Number of ER visits labeled as 'U: Urgent but could be deferred': 1  | 0.2361      | 0.0074  |
| Number of ER visits labeled as 'U: Urgent but could be deferred': 2+ | 0.5049      | <.0001  |
| Number of ER visits labeled as 'N: Not Urgent': 1+                   | 0.0593      | 0.6033  |
| Cancer (specialty visit)                                             | 0.8804      | 0.0421  |
| Cancer (hospital admission)                                          | 1.9472      | 0.0019  |
| Cardiovascular (drug use)                                            | 0.0531      | 0.9215  |
| Cardiovascular (hospital admission)                                  | -0.1109     | 0.8265  |
| Skin (specialty visit)                                               | -0.0202     | 0.8567  |
| Dental Conditions (hospital admission)                               | -0.789      | 0.2343  |
| Endocrine (specialty visit)                                          | -0.4513     | 0.0949  |
| Endocrine (drug use)                                                 | 0.1639      | 0.7554  |
| Endocrine (hospital admission)                                       | 0.1729      | 0.6192  |
| Ear, Nose, Throat (specialty visit)                                  | 1.5421      | <.0001  |
| Ear, Nose, Throat (hospital admission)                               | -0.467      | 0.0722  |
| Eye (hospital admission)                                             | -0.3721     | 0.604   |
| Genetic Conditions (hospital admission)                              | 1.3712      | 0.0286  |
| Gastrointestinal (specialty visit)                                   | -0.4065     | 0.1273  |
| Gastrointestinal (hospital admission with primary diagnosis)         | 0.5999      | 0.045   |
| Gastrointestinal (hospital admission with secondary diagnosis)       | 0.8453      | 0.0224  |
| Genitourinary (specialty visit)                                      | 0.0925      | 0.8232  |
| Genitourinary (hospital admission)                                   | -0.0319     | 0.9572  |
| OB/GYN (hospital admission)                                          | -10.576     | 0.9463  |
| Hematological (hospital admission)                                   | -0.0211     | 0.9641  |
| Hepatobiliary (hospital admission)                                   | 0.3693      | 0.6164  |
| Immunologic Disease (hospital admission)                             | 0.5725      | 0.4888  |
| Infectious Disease (hospital admission)                              | 0.1486      | 0.7992  |
| Musculoskeletal (hospital admission)                                 | -0.6102     | 0.0649  |
| Neurologic Diseases (drug use)                                       | 0.6316      | 0.1157  |
| Neurologic Diseases (hospital admission)                             | 1.327       | <.0001  |
| Nutrition (hospital admission)                                       | 0.3239      | 0.5243  |
| Neonatal/other condition (hospital admission)                        | 0.2169      | 0.614   |
| Pediatric medical specialty visit                                    | 0.3156      | 0.0413  |
| Inappropriate Rx                                                     | -0.1339     | 0.7061  |
| Psychological (hospital admission)                                   | -0.4714     | 0.344   |

|    |                                                                         |         |        |
|----|-------------------------------------------------------------------------|---------|--------|
| 1  |                                                                         |         |        |
| 2  |                                                                         |         |        |
| 3  | Respiratory (specialty visit)                                           | 0.0964  | 0.7649 |
| 4  | Respiratory (drug use)                                                  | -0.0021 | 0.9908 |
| 5  | Respiratory (hospital admission)                                        | 0.3228  | 0.2791 |
| 6  | Antibiotics Usage (number of Rx): 1                                     | 0.2231  | 0.0191 |
| 7  | Antibiotics Usage (number of Rx): 2                                     | 0.5496  | <.0001 |
| 8  | Antibiotics Usage (number of Rx): 3+                                    | 0.7316  | <.0001 |
| 9  | Skin (hospital admission)                                               | -0.4769 | 0.5205 |
| 10 | Pediatric surgical specialty visit                                      | 0.163   | 0.6316 |
| 11 | Trauma (hospital admission)                                             | 0.6965  | 0.2614 |
| 12 | Low income (exemption variables from AFT/FED and ASA)                   | 0.2506  | 0.0006 |
| 13 | Disabled (exemption variables from AFT/FED and ASA)                     | 0.3811  | 0.0453 |
| 14 | Immigrant                                                               | 0.0669  | 0.4837 |
| 15 | History: Cancer (hospital admission)                                    | -1.2579 | 0.0794 |
| 16 | History: Cardiovascular (hospital admission)                            | -0.5369 | 0.0971 |
| 17 | History: Dental Conditions (hospital admission)                         | 0.6569  | 0.0201 |
| 18 | History: Endocrine (hospital admission)                                 | -0.0114 | 0.9665 |
| 19 | History: Ear, Nose, Throat (hospital admission)                         | 0.1263  | 0.2948 |
| 20 | History: Eye (hospital admission)                                       | 0.1505  | 0.5917 |
| 21 | History: Genetic Conditions (hospital admission)                        | -0.2005 | 0.6414 |
| 22 | History: Gastrointestinal (hospital admission with primary diagnosis)   | 0.32    | 0.0332 |
| 23 | History: Gastrointestinal (hospital admission with secondary diagnosis) | 0.0424  | 0.8574 |
| 24 | History: Genitourinary (hospital admission)                             | -0.0075 | 0.9806 |
| 25 | History: OB/GYN (hospital admission)                                    | 0.9705  | 0.0427 |
| 26 | History: Hematological (hospital admission)                             | 0.3297  | 0.1683 |
| 27 | History: Hepatobiliary (hospital admission)                             | 0.1931  | 0.7029 |
| 28 | History: Immunologic Disease (hospital admission)                       | 0.469   | 0.2754 |
| 29 | History: Infectious Disease (hospital admission)                        | 0.0864  | 0.7466 |
| 30 | History: Musculoskeletal (hospital admission)                           | 0.3058  | 0.0805 |
| 31 | History: Neurologic Diseases (hospital admission)                       | 0.2079  | 0.3002 |
| 32 | History: Nutrition (hospital admission)                                 | -0.1424 | 0.6003 |
| 33 | History: Other Conditions (hospital admission)                          | -1.1015 | 0.0258 |
| 34 | History: Neonatal Conditions (hospital admission)                       | -0.054  | 0.9358 |
| 35 | History: Psychological (hospital admission)                             | 0.2273  | 0.3797 |
| 36 | History: Respiratory (hospital admission)                               | 0.0871  | 0.5762 |
| 37 | History: Skin (hospital admission)                                      | 0.0572  | 0.8443 |
| 38 | History: Trauma (hospital admission)                                    | 0.4149  | 0.1635 |
| 39 | History: Skin (specialty visit)                                         | -0.135  | 0.0878 |
| 40 | History: Pediatric surgical specialty visit                             | 0.011   | 0.9465 |
| 41 | History: Gastrointestinal (specialty visit)                             | 0.4319  | 0.0093 |
| 42 | History: Endocrine (specialty visit)                                    | 0.4559  | 0.0118 |
| 43 | History: Genitourinary (specialty visit)                                | -0.1484 | 0.6694 |
| 44 |                                                                         |         |        |
| 45 |                                                                         |         |        |
| 46 |                                                                         |         |        |
| 47 |                                                                         |         |        |
| 48 |                                                                         |         |        |
| 49 |                                                                         |         |        |
| 50 |                                                                         |         |        |
| 51 |                                                                         |         |        |
| 52 |                                                                         |         |        |
| 53 |                                                                         |         |        |
| 54 |                                                                         |         |        |
| 55 |                                                                         |         |        |
| 56 |                                                                         |         |        |
| 57 |                                                                         |         |        |
| 58 |                                                                         |         |        |
| 59 |                                                                         |         |        |
| 60 |                                                                         |         |        |

1  
2  
3  
4  
5  
6  
7  
8  
9  
10  
11  
12  
13  
14  
15  
16  
17  
18  
19  
20  
21  
22  
23  
24  
25  
26  
27  
28  
29  
30  
31  
32  
33  
34  
35  
36  
37  
38  
39  
40  
41  
42  
43  
44  
45  
46  
47  
48  
49  
50  
51  
52  
53  
54  
55  
56  
57  
58  
59  
60

|                                                                               |         |        |
|-------------------------------------------------------------------------------|---------|--------|
| History: Cancer (specialty visit)                                             | -0.2097 | 0.604  |
| History: Ear, Nose, Throat (specialty visit)                                  | 0.3035  | <.0001 |
| History: Pediatric medical specialty visit                                    | 0.00862 | 0.9143 |
| History: Respiratory (specialty visit)                                        | -0.0033 | 0.9886 |
| History: Cardiovascular (drug use)                                            | 0.7729  | 0.0742 |
| History: Respiratory (drug use)                                               | 0.1033  | 0.3109 |
| History: Endocrine (drug use)                                                 | 0.3977  | 0.453  |
| History: Neurologic Diseases (drug use)                                       | 0.1549  | 0.7028 |
| History: Inappropriate Rx                                                     | 0.1035  | 0.3876 |
| History: Antibiotics Usage (number of years history)                          | 0.0952  | 0.0004 |
| History: Number of ER visits labeled as 'C: Critical': 1+                     | 0.7989  | 0.0396 |
| History: Number of ER visits labeled as 'A: Acute': 1                         | -0.1075 | 0.451  |
| History: Number of ER visits labeled as 'A: Acute': 2+                        | 0.3286  | 0.043  |
| History: Number of ER visits labeled as 'U: Urgent but could be deferred': 1  | 0.2086  | 0.0248 |
| History: Number of ER visits labeled as 'U: Urgent but could be deferred': 2+ | 0.1974  | 0.0158 |
| History: Number of ER visits labeled as 'N: Not Urgent': 1+                   | -0.0564 | 0.4744 |

Peer review only

**STROBE 2007 (v4) checklist of items to be included in reports of observational studies in epidemiology\***  
**Checklist for cohort, case-control, and cross-sectional studies (combined)**

| Section/Topic             | Item # | Recommendation                                                                                                                                                                                                                                                                                                                                                                                                                                                         | Reported on page # |
|---------------------------|--------|------------------------------------------------------------------------------------------------------------------------------------------------------------------------------------------------------------------------------------------------------------------------------------------------------------------------------------------------------------------------------------------------------------------------------------------------------------------------|--------------------|
| Title and abstract        | 1      | (a) Indicate the study's design with a commonly used term in the title or the abstract                                                                                                                                                                                                                                                                                                                                                                                 | 1                  |
|                           |        | (b) Provide in the abstract an informative and balanced summary of what was done and what was found                                                                                                                                                                                                                                                                                                                                                                    | 2-3                |
| <b>Introduction</b>       |        |                                                                                                                                                                                                                                                                                                                                                                                                                                                                        |                    |
| Background/rationale      | 2      | Explain the scientific background and rationale for the investigation being reported                                                                                                                                                                                                                                                                                                                                                                                   | 4-5                |
| Objectives                | 3      | State specific objectives, including any pre-specified hypotheses                                                                                                                                                                                                                                                                                                                                                                                                      | 5                  |
| <b>Methods</b>            |        |                                                                                                                                                                                                                                                                                                                                                                                                                                                                        |                    |
| Study design              | 4      | Present key elements of study design early in the paper                                                                                                                                                                                                                                                                                                                                                                                                                | 6                  |
| Setting                   | 5      | Describe the setting, locations, and relevant dates, including periods of recruitment, exposure, follow-up, and data collection                                                                                                                                                                                                                                                                                                                                        | 6                  |
| Participants              | 6      | (a) <i>Cohort study</i> —Give the eligibility criteria, and the sources and methods of selection of participants. Describe methods of follow-up<br><i>Case-control study</i> —Give the eligibility criteria, and the sources and methods of case ascertainment and control selection. Give the rationale for the choice of cases and controls<br><i>Cross-sectional study</i> —Give the eligibility criteria, and the sources and methods of selection of participants | 7                  |
|                           |        | (b) <i>Cohort study</i> —For matched studies, give matching criteria and number of exposed and unexposed<br><i>Case-control study</i> —For matched studies, give matching criteria and the number of controls per case                                                                                                                                                                                                                                                 |                    |
| Variables                 | 7      | Clearly define all outcomes, exposures, predictors, potential confounders, and effect modifiers. Give diagnostic criteria, if applicable                                                                                                                                                                                                                                                                                                                               | 7-11               |
| Data sources/ measurement | 8*     | For each variable of interest, give sources of data and details of methods of assessment (measurement). Describe comparability of assessment methods if there is more than one group                                                                                                                                                                                                                                                                                   | 7-11               |
| Bias                      | 9      | Describe any efforts to address potential sources of bias                                                                                                                                                                                                                                                                                                                                                                                                              | 7-11               |
| Study size                | 10     | Explain how the study size was arrived at                                                                                                                                                                                                                                                                                                                                                                                                                              | 7                  |
| Quantitative variables    | 11     | Explain how quantitative variables were handled in the analyses. If applicable, describe which groupings were chosen and why                                                                                                                                                                                                                                                                                                                                           | 7-11               |
| Statistical methods       | 12     | (a) Describe all statistical methods, including those used to control for confounding                                                                                                                                                                                                                                                                                                                                                                                  | 11-12              |
|                           |        | (b) Describe any methods used to examine subgroups and interactions                                                                                                                                                                                                                                                                                                                                                                                                    |                    |
|                           |        | (c) Explain how missing data were addressed                                                                                                                                                                                                                                                                                                                                                                                                                            |                    |
|                           |        | (d) <i>Cohort study</i> —If applicable, explain how loss to follow-up was addressed<br><i>Case-control study</i> —If applicable, explain how matching of cases and controls was addressed                                                                                                                                                                                                                                                                              |                    |

|                          |     |                                                                                                                                                                                                                                                                                                                                                                                                               |                        |
|--------------------------|-----|---------------------------------------------------------------------------------------------------------------------------------------------------------------------------------------------------------------------------------------------------------------------------------------------------------------------------------------------------------------------------------------------------------------|------------------------|
|                          |     | <i>Cross-sectional study</i> —If applicable, describe analytical methods taking account of sampling strategy                                                                                                                                                                                                                                                                                                  |                        |
|                          |     | (e) Describe any sensitivity analyses                                                                                                                                                                                                                                                                                                                                                                         |                        |
| <b>Results</b>           |     |                                                                                                                                                                                                                                                                                                                                                                                                               |                        |
| Participants             | 13* | (a) Report numbers of individuals at each stage of study—eg numbers potentially eligible, examined for eligibility, confirmed eligible, included in the study, completing follow-up, and analysed<br>(b) Give reasons for non-participation at each stage<br>(c) Consider use of a flow diagram                                                                                                               | 12                     |
| Descriptive data         | 14* | (a) Give characteristics of study participants (eg demographic, clinical, social) and information on exposures and potential confounders<br>(b) Indicate number of participants with missing data for each variable of interest<br>(c) <i>Cohort study</i> —Summarise follow-up time (eg, average and total amount)                                                                                           | 12-14, Table 1 and 2   |
| Outcome data             | 15* | <i>Cohort study</i> —Report numbers of outcome events or summary measures over time<br><i>Case-control study</i> —Report numbers in each exposure category, or summary measures of exposure<br><i>Cross-sectional study</i> —Report numbers of outcome events or summary measures                                                                                                                             | 12-14, Table 3         |
| Main results             | 16  | (a) Give unadjusted estimates and, if applicable, confounder-adjusted estimates and their precision (eg, 95% confidence interval). Make clear which confounders were adjusted for and why they were included<br>(b) Report category boundaries when continuous variables were categorized<br>(c) If relevant, consider translating estimates of relative risk into absolute risk for a meaningful time period | 14-15, Table 4, Fig. 1 |
| Other analyses           | 17  | Report other analyses done—eg analyses of subgroups and interactions, and sensitivity analyses                                                                                                                                                                                                                                                                                                                |                        |
| <b>Discussion</b>        |     |                                                                                                                                                                                                                                                                                                                                                                                                               |                        |
| Key results              | 18  | Summarise key results with reference to study objectives                                                                                                                                                                                                                                                                                                                                                      | 15                     |
| Limitations              | 19  | Discuss limitations of the study, taking into account sources of potential bias or imprecision. Discuss both direction and magnitude of any potential bias                                                                                                                                                                                                                                                    | 16                     |
| Interpretation           | 20  | Give a cautious overall interpretation of results considering objectives, limitations, multiplicity of analyses, results from similar studies, and other relevant evidence                                                                                                                                                                                                                                    | 17                     |
| Generalisability         | 21  | Discuss the generalisability (external validity) of the study results                                                                                                                                                                                                                                                                                                                                         | 17                     |
| <b>Other information</b> |     |                                                                                                                                                                                                                                                                                                                                                                                                               |                        |
| Funding                  | 22  | Give the source of funding and the role of the funders for the present study and, if applicable, for the original study on which the present article is based                                                                                                                                                                                                                                                 | 18                     |

\*Give information separately for cases and controls in case-control studies and, if applicable, for exposed and unexposed groups in cohort and cross-sectional studies.

**Note:** An Explanation and Elaboration article discusses each checklist item and gives methodological background and published examples of transparent reporting. The STROBE checklist is best used in conjunction with this article (freely available on the Web sites of PLoS Medicine at <http://www.plosmedicine.org/>, Annals of Internal Medicine at <http://www.annals.org/>, and Epidemiology at <http://www.epidem.com/>). Information on the STROBE Initiative is available at [www.strobe-statement.org](http://www.strobe-statement.org).
