# Supplementary material for: Predicting risk of hospitalisation: a retrospective population-based analysis in a paediatric population in Emilia-Romagna, Italy
Source: PubMed Central journal article supplement — BMJ Open. 2018 May 5;8(5):e019454. doi: 10.1136/bmjopen-2017-019454 (PMC5942467; doi:10.1136/bmjopen-2017-019454), 2018-05-05
Supplement: bmjopen-2017-019454supp001.pdf [file bmjopen-2017-019454supp001.pdf]

Appendix 1: Hospitalization that could have potentially been prevented or delayed with appropriate patient care

| Condition Category                            | Added Conditions                                                        |                                                               |                                                            |
|-----------------------------------------------|-------------------------------------------------------------------------|---------------------------------------------------------------|------------------------------------------------------------|
|                                               | ICD-9-CM Code <sup>+</sup>                                              | ICD-9-CM Code                                                 | Disease Staging Category                                   |
| <b>Immunization preventable conditions</b>    | 033 Whooping cough                                                      | 052 Chickenpox                                                | NEU14(Meningitis: Bacterial)*                              |
|                                               | <del>390 Rheumatic fever without mention of heart involvement</del>     | 055 Measles                                                   | RES11 (Influenza)**                                        |
|                                               | <del>391 Rheumatic fever with heart involvement</del>                   | 056 Rubella                                                   | RES23(Respiratory Syncytial Virus Infections 1.06 above)** |
|                                               | 037 Tetanus                                                             | 072 Mumps                                                     |                                                            |
|                                               | 045 Acute poliomyelitis                                                 |                                                               |                                                            |
|                                               | 320.0 Hemophilus meningitis                                             |                                                               |                                                            |
| <b>Grand mal status/epileptic convulsions</b> | 345 Epilepsy and recurrent seizures                                     |                                                               |                                                            |
| <b>Convulsion</b>                             | 780.3 Convulsions                                                       |                                                               |                                                            |
| <b>Severe ENT infections</b>                  | 382 Suppurative and unspecified otitis media                            | 381 Nonsuppurative otitis media and Eustachian tube disorders | ENT19 (Pharyngitis: Non-Streptococcal)*                    |
|                                               | 462 Acute pharyngitis                                                   |                                                               | ENT21 (Sinusitis 2/3)**                                    |
|                                               | 463 Acute tonsillitis                                                   |                                                               |                                                            |
|                                               | 465 Acute upper respiratory infections of multiple or unspecified sites |                                                               |                                                            |
|                                               | 472.1 Chronic pharyngitis                                               |                                                               |                                                            |
| <b>Tuberculosis</b>                           | 011 Pulmonary tuberculosis                                              | 010 Primary tuberculous infection                             |                                                            |
|                                               | 012 Other respiratory tuberculosis                                      | 137 Late effects of tuberculosis                              |                                                            |
|                                               | 013 Tuberculosis of meninges and central nervous system                 |                                                               |                                                            |
|                                               | 014 Tuberculosis of intestines, peritoneum, and mesenteric glands       |                                                               |                                                            |
|                                               | 015 Tuberculosis of bones and joints                                    |                                                               |                                                            |
|                                               | 016 Tuberculosis of genitourinary system                                |                                                               |                                                            |
|                                               | 017 Tuberculosis of other organs                                        |                                                               |                                                            |
|                                               | 018 Miliary tuberculosis                                                |                                                               |                                                            |
| <b>Bacterial pneumonia</b>                    | 481 Pneumococcal pneumonia [Streptococcus pneumoniae pneumonia]         | 482.0 Pneumonia due to Klebsiella pneumoniae                  |                                                            |
|                                               | 482.2 Pneumonia due to Hemophilus influenzae [H. influenzae]            | 482.1 Pneumonia due to Pseudomonas                            |                                                            |
|                                               | 482.3 Pneumonia due to Streptococcus                                    | 482.4 Pneumonia due to Staphylococcus                         |                                                            |
|                                               | 482.9 Bacterial pneumonia                                               | 482.8 Pneumonia due to                                        |                                                            |

<sup>+</sup> From Shi, L. & Lu, N. Individual Sociodemographic Characteristics Associated with Hospitalization for Pediatric Ambulatory Care Sensitive Conditions. *Journal of Health Care for the Poor and Underserved*. 2000; 11(4): 373-384.

\* Expansion of condition included in Shi and Lu

\*\* Addition to conditions in Shi and Lu

|                                     |                                                                       |                                                |                                                 |
|-------------------------------------|-----------------------------------------------------------------------|------------------------------------------------|-------------------------------------------------|
|                                     | unspecified                                                           | other specified bacteria                       |                                                 |
|                                     | 483 Pneumonia due to other specified organism                         |                                                |                                                 |
|                                     | 485 Bronchopneumonia, organism unspecified                            |                                                |                                                 |
|                                     | 486 Pneumonia, organism unspecified                                   |                                                |                                                 |
| <b>Asthma</b>                       | 493 Asthma                                                            |                                                |                                                 |
| <b>Cellulitis</b>                   | 681 Cellulitis and abscess of finger and toe                          |                                                |                                                 |
|                                     | 682 Other cellulitis and abscess                                      |                                                |                                                 |
|                                     | 683 Acute lymphadenitis                                               |                                                |                                                 |
|                                     | 686 Other local infections of skin and subcutaneous tissue            |                                                |                                                 |
|                                     | 707 Chronic ulcer of skin                                             |                                                |                                                 |
| <b>Diabetes</b>                     | 250.1 Diabetes with ketoacidosis                                      |                                                |                                                 |
|                                     | 250.2 Diabetes with hyperosmolarity                                   |                                                |                                                 |
|                                     | 250.3 Diabetes with other coma                                        |                                                |                                                 |
|                                     | 250.8 Diabetes with other specified manifestations                    |                                                |                                                 |
|                                     | 250.9 Diabetes with unspecified complication                          |                                                |                                                 |
|                                     | 250.0 Diabetes mellitus without mention of complication               |                                                |                                                 |
| <b>Gastroenteritis</b>              | 558.9 Other and unspecified noninfectious gastroenteritis and colitis | 008.6 Enteritis due to specified virus         | GIS32 (Salmonellosis)**                         |
|                                     |                                                                       | 008.8 Other organism, not elsewhere classified | GIS37 (Ulcerative Colitis 2/3)**                |
|                                     |                                                                       | 009 Ill-defined intestinal infections          |                                                 |
|                                     |                                                                       | 007 Other protozoal intestinal diseases        |                                                 |
|                                     |                                                                       | 558.2 Toxic gastroenteritis and colitis        |                                                 |
|                                     |                                                                       | 558.4 Eosinophilic gastroenteritis and colitis |                                                 |
| <b>Kidney and urinary infection</b> | 590 Infections of kidney                                              | 595.0 Acute cystitis                           | GUS10(Urinary Tract Infections 2/3)*            |
|                                     | 599.0 Urinary tract infection, site not specified                     | 595.9 Cystitis, unspecified                    | GUS83(Other Disorders of Kidney or Ureter 2/3)* |
|                                     | 599.9 Unspecified disorder of urethra and urinary tract               |                                                |                                                 |
| <b>Dehydration-volume depletion</b> | 276.5 Volume depletion                                                |                                                |                                                 |
| <b>Iron deficiency anemia</b>       | 280.1 Secondary to inadequate dietary iron intake                     |                                                |                                                 |
|                                     | 280.8 Other specified iron deficiency anemias                         |                                                |                                                 |
|                                     | 280.9 Iron deficiency anemia, unspecified                             |                                                |                                                 |
| <b>Nutritional deficiencies</b>     | 260 Kwashiorkor                                                       |                                                |                                                 |
|                                     | 261 Nutritional marasmus                                              |                                                |                                                 |
|                                     | 262 Other severe protein-calorie malnutrition                         |                                                |                                                 |
|                                     | 268.0 Rickets, active                                                 |                                                |                                                 |
|                                     | 268.1 Rickets, late effect                                            |                                                |                                                 |

|                                                      |                                                                                           |                                                 |                                                                 |
|------------------------------------------------------|-------------------------------------------------------------------------------------------|-------------------------------------------------|-----------------------------------------------------------------|
| <b>Failure to thrive</b>                             | 783.4 Lack of expected normal physiological development in childhood                      |                                                 |                                                                 |
| <b>Dental conditions</b>                             | 521 Diseases of hard tissues of teeth                                                     |                                                 |                                                                 |
|                                                      | 522 Diseases of pulp and periapical tissues                                               |                                                 |                                                                 |
|                                                      | 523 Gingival and periodontal diseases                                                     |                                                 |                                                                 |
|                                                      | 525 Other diseases and conditions of the teeth and supporting structures                  |                                                 |                                                                 |
|                                                      | 528 Diseases of the oral soft tissues, excluding lesions specific for gingiva and tongue  |                                                 |                                                                 |
| <b>Pelvic inflammatory disease</b>                   | 614 Inflammatory disease of ovary, fallopian tube, pelvic cellular tissue, and peritoneum |                                                 |                                                                 |
| <b>Hypoglycemia</b>                                  | 251.2 Hypoglycemia, unspecified                                                           | 251.0 Hypoglycemic coma                         |                                                                 |
|                                                      |                                                                                           | 251.1 Other specified hypoglycemia              |                                                                 |
|                                                      |                                                                                           | 775.0 Syndrome of "infant of a diabetic mother" |                                                                 |
| <b>Appendicitis (stage 2 or 3)</b>                   |                                                                                           |                                                 | GIS05(Appendicitis 2/3)*                                        |
| <b>Congenital Syphilis</b>                           |                                                                                           | 090.9 Congenital syphilis, unspecified          |                                                                 |
| <b>Cardiovascular disease (including CHF)</b>        |                                                                                           | 428 Heart failure                               |                                                                 |
| <b>Trauma (including Head Injury)</b>                |                                                                                           |                                                 | TRA01(Acetaminophen Toxicity)*                                  |
|                                                      |                                                                                           |                                                 | TRA02(Adverse Drug Reactions)*                                  |
|                                                      |                                                                                           |                                                 | TRA04(Burns)*                                                   |
|                                                      |                                                                                           |                                                 | TRA05(Burns, Chemical: Esophagus, Stomach, or Small Intestine)* |
|                                                      |                                                                                           |                                                 | TRA09(Toxic Effects of Nonmedicinal Agents)*                    |
|                                                      |                                                                                           |                                                 | NEU11(Injury: Craniocerebral)*                                  |
|                                                      |                                                                                           |                                                 | TRA80(Effects of Environment and Other External Causes 3)*      |
| <b>Rheumatic fever</b>                               | 390 Rheumatic fever without mention of heart involvement                                  |                                                 |                                                                 |
|                                                      | 391 Rheumatic fever with heart involvement                                                |                                                 |                                                                 |
| <b>Monotropic hormone deficiency</b>                 |                                                                                           |                                                 | END10 (Monotropic hormone deficiency 2/3)*                      |
| <b>Foreign Body: Nasopharynx, Throat or Bronchus</b> |                                                                                           |                                                 | ENT04 (Foreign Body: Nasopharynx, Throat or Bronchus)*          |
| <b>Gastritis</b>                                     |                                                                                           |                                                 | GIS17 (Gastritis 2/3)*                                          |
