# Supplementary material for: Predicting risk of hospitalisation: a retrospective population-based analysis in a paediatric population in Emilia-Romagna, Italy
Source: PubMed Central journal article supplement — BMJ Open. 2018 May 5;8(5):e019454. doi: 10.1136/bmjopen-2017-019454 (PMC5942467; doi:10.1136/bmjopen-2017-019454), 2018-05-05
Supplement: bmjopen-2017-019454supp002.pdf [file bmjopen-2017-019454supp002.pdf]

Appendix 2: Admissions for a complication of selected conditions

| Condition Category                            | ICD-9-CM Code                                                           | Disease Staging Category includes Admissions for a Complication of Selected Conditions*                                                                                            |
|-----------------------------------------------|-------------------------------------------------------------------------|------------------------------------------------------------------------------------------------------------------------------------------------------------------------------------|
| <b>Immunization preventable conditions</b>    | 033 Whooping cough                                                      | RES28(Pertussis)                                                                                                                                                                   |
|                                               | 037 Tetanus                                                             | INF28 (Tetanus)                                                                                                                                                                    |
|                                               | 045 Acute poliomyelitis                                                 | INF20 (Poliomyelitis)                                                                                                                                                              |
|                                               | 320.0 Hemophilus meningitis                                             | NEU14(Meningitis: Bacterial)                                                                                                                                                       |
|                                               | 052 Chickenpox                                                          | INF30 (Varicella (Chickenpox) )                                                                                                                                                    |
|                                               | 055 Measles                                                             | INF18 (Measles or Rubeola)                                                                                                                                                         |
|                                               | 056 Rubella                                                             | INF25 (Rubella: Acquired)                                                                                                                                                          |
|                                               | 072 Mumps                                                               | INF32 (Mumps)                                                                                                                                                                      |
| <b>Grand mal status/epileptic convulsions</b> | 345 Epilepsy and recurrent seizures                                     | NEU07(Epilepsy)                                                                                                                                                                    |
| <b>Convulsion</b>                             | 780.3 Convulsions                                                       |                                                                                                                                                                                    |
| <b>Severe ENT infections</b>                  | 381 Nonsuppurative otitis media and Eustachian tube disorders           | ENT18 (Otitis Media),ENT19 (Pharyngitis: Non-Streptococcal),ENT81 (Other Ear, Nose and Throat Disorders), ENT82(Other Ear, Nose, and Throat Infections)                            |
|                                               | 382 Suppurative and unspecified otitis media                            |                                                                                                                                                                                    |
|                                               | 462 Acute pharyngitis                                                   |                                                                                                                                                                                    |
|                                               | 463 Acute tonsillitis                                                   |                                                                                                                                                                                    |
|                                               | 465 Acute upper respiratory infections of multiple or unspecified sites |                                                                                                                                                                                    |
|                                               | 472.1 Chronic pharyngitis                                               |                                                                                                                                                                                    |
| <b>Tuberculosis</b>                           | 010 Primary tuberculous infection                                       | RES27 (Tuberculosis)                                                                                                                                                               |
|                                               | 011 Pulmonary tuberculosis                                              |                                                                                                                                                                                    |
|                                               | 012 Other respiratory tuberculosis                                      |                                                                                                                                                                                    |
|                                               | 013 Tuberculosis of meninges and central nervous system                 |                                                                                                                                                                                    |
|                                               | 014 Tuberculosis of intestines, peritoneum, and mesenteric glands       |                                                                                                                                                                                    |
|                                               | 015 Tuberculosis of bones and joints                                    |                                                                                                                                                                                    |
|                                               | 016 Tuberculosis of genitourinary system                                |                                                                                                                                                                                    |
|                                               | 017 Tuberculosis of other organs                                        |                                                                                                                                                                                    |
|                                               | 018 Miliary tuberculosis                                                |                                                                                                                                                                                    |
|                                               | 137 Late effects of tuberculosis                                        |                                                                                                                                                                                    |
| <b>Bacterial pneumonia</b>                    | 481 Pneumococcal pneumonia [Streptococcus pneumoniae pneumonia]         | RES12(Mycoplasma pneumoniae Infection), RES15(Pneumonia: Bacterial), RES16(Pneumonia: Chlamydial), RES17(Pneumonia: Legionella), RES24 (Rhino, Adeno, and Corona Virus Infections) |
|                                               | 482.0 Pneumonia due to Klebsiella pneumoniae                            |                                                                                                                                                                                    |
|                                               | 482.1 Pneumonia due to Pseudomonas                                      |                                                                                                                                                                                    |
|                                               | 482.2 Pneumonia due to Hemophilus influenzae [H. influenzae]            |                                                                                                                                                                                    |
|                                               | 482.3 Pneumonia due to Streptococcus                                    |                                                                                                                                                                                    |
|                                               | 482.4 Pneumonia due to Staphylococcus                                   |                                                                                                                                                                                    |
|                                               | 482.8 Pneumonia due to other specified bacteria                         |                                                                                                                                                                                    |
|                                               | 482.9 Bacterial pneumonia unspecified                                   |                                                                                                                                                                                    |
|                                               | 483 Pneumonia due to other specified organism                           |                                                                                                                                                                                    |
|                                               | 485 Bronchopneumonia, organism unspecified                              |                                                                                                                                                                                    |
|                                               | 486 Pneumonia, organism unspecified                                     |                                                                                                                                                                                    |
| <b>Asthma</b>                                 | 493 Asthma                                                              | RES02 (Asthma)                                                                                                                                                                     |
| <b>Cellulitis</b>                             | 681 Cellulitis and abscess of finger and toe                            |                                                                                                                                                                                    |

|                                     |                                                                       |                                                                                                                                                                                                                                                                                                                                                                                                                                                                                                                                                                                            |
|-------------------------------------|-----------------------------------------------------------------------|--------------------------------------------------------------------------------------------------------------------------------------------------------------------------------------------------------------------------------------------------------------------------------------------------------------------------------------------------------------------------------------------------------------------------------------------------------------------------------------------------------------------------------------------------------------------------------------------|
|                                     | 682 Other cellulitis and abscess                                      |                                                                                                                                                                                                                                                                                                                                                                                                                                                                                                                                                                                            |
|                                     | 683 Acute lymphadenitis                                               |                                                                                                                                                                                                                                                                                                                                                                                                                                                                                                                                                                                            |
|                                     | 686 Other local infections of skin and subcutaneous tissue            |                                                                                                                                                                                                                                                                                                                                                                                                                                                                                                                                                                                            |
|                                     | 707 Chronic ulcer of skin                                             |                                                                                                                                                                                                                                                                                                                                                                                                                                                                                                                                                                                            |
| <b>Diabetes</b>                     | 250.1 Diabetes with ketoacidosis                                      | END04(Diabetes Mellitus Type 1),<br>END05(Diabetes Mellitus Type 2, Unspecified Types of Diabetes, and Hyperglycemic States)                                                                                                                                                                                                                                                                                                                                                                                                                                                               |
|                                     | 250.2 Diabetes with hyperosmolarity                                   |                                                                                                                                                                                                                                                                                                                                                                                                                                                                                                                                                                                            |
|                                     | 250.3 Diabetes with other coma                                        |                                                                                                                                                                                                                                                                                                                                                                                                                                                                                                                                                                                            |
|                                     | 250.8 Diabetes with other specified manifestations                    |                                                                                                                                                                                                                                                                                                                                                                                                                                                                                                                                                                                            |
|                                     | 250.9 Diabetes with unspecified complication                          |                                                                                                                                                                                                                                                                                                                                                                                                                                                                                                                                                                                            |
|                                     | 250.0 Diabetes mellitus without mention of complication               |                                                                                                                                                                                                                                                                                                                                                                                                                                                                                                                                                                                            |
| <b>Gastroenteritis</b>              | 008.6 Enteritis due to specified virus                                | GIS81(Gastroenteritis)                                                                                                                                                                                                                                                                                                                                                                                                                                                                                                                                                                     |
|                                     | 008.8 Other organism, not elsewhere classified                        |                                                                                                                                                                                                                                                                                                                                                                                                                                                                                                                                                                                            |
|                                     | 009 Ill-defined intestinal infections                                 |                                                                                                                                                                                                                                                                                                                                                                                                                                                                                                                                                                                            |
|                                     | 007 Other protozoal intestinal diseases                               |                                                                                                                                                                                                                                                                                                                                                                                                                                                                                                                                                                                            |
|                                     | 558.2 Toxic gastroenteritis and colitis                               |                                                                                                                                                                                                                                                                                                                                                                                                                                                                                                                                                                                            |
|                                     | 558.4 Eosinophilic gastroenteritis and colitis                        |                                                                                                                                                                                                                                                                                                                                                                                                                                                                                                                                                                                            |
|                                     | 558.9 Other and unspecified noninfectious gastroenteritis and colitis |                                                                                                                                                                                                                                                                                                                                                                                                                                                                                                                                                                                            |
|                                     | 599.9 Unspecified disorder of urethra and urinary tract               |                                                                                                                                                                                                                                                                                                                                                                                                                                                                                                                                                                                            |
|                                     | 595.0 Acute cystitis                                                  |                                                                                                                                                                                                                                                                                                                                                                                                                                                                                                                                                                                            |
|                                     | 595.9 Cystitis, unspecified                                           |                                                                                                                                                                                                                                                                                                                                                                                                                                                                                                                                                                                            |
| <b>Kidney and urinary infection</b> |                                                                       | GUS10(Urinary Tract Infections, 1.02 above),<br>GUS83(Other Disorders of Kidney or Ureter),<br>GUS01(Bladder Disorders), END04(Diabetes Mellitus Type 1), END05(Diabetes Mellitus Type 2),<br>HEM06(Anemia: Sickle Cell), INF03(Candida (Monilial) Infections), MGS08(Prostatitis),<br>PED06(Anomaly: Defects of Kidney),<br>GUS02(Calculus of the Urinary Tract),<br>GYN34(Vulvovaginitis), HEM19(Neoplasm, Malignant: Leukemia, Acute Nonlymphocytic),<br>MGS01(Benign Prostatic Hypertrophy),<br>NEU23(Injury: Spine and Spinal Cord: Low Back),<br>PED09(Anomaly: Neural Tube Defects) |
|                                     | 590 Infections of kidney                                              |                                                                                                                                                                                                                                                                                                                                                                                                                                                                                                                                                                                            |
| <b>Dehydration-volume depletion</b> | 276.5 Volume depletion                                                | GIS12 (Food Poisoning: Other Organisms, 1.02 above), GIS13(Food Poisoning: S. aureus),<br>PED05(Anomaly: Congenital Megacolon),<br>NUT80(Other Electrolyte Disorders),<br>CVS12(Digoxin Toxicity), PSY05(Drug Abuse, Dependence, Intoxication: Alcohol)                                                                                                                                                                                                                                                                                                                                    |
| <b>Iron deficiency anemia</b>       | 280.1 Secondary to inadequate dietary iron intake                     | HEM05(Anemia: Iron Deficiency)                                                                                                                                                                                                                                                                                                                                                                                                                                                                                                                                                             |
|                                     | 280.8 Other specified iron deficiency anemias                         |                                                                                                                                                                                                                                                                                                                                                                                                                                                                                                                                                                                            |
|                                     | 280.9 Iron deficiency anemia, unspecified                             |                                                                                                                                                                                                                                                                                                                                                                                                                                                                                                                                                                                            |
| <b>Nutritional deficiencies</b>     | 260 Kwashiorkor                                                       | NUT81 (Other Nutritional and Metabolic Disorders),END18 (Vitamin D Deficiency),<br>PSY13(Eating disorders: Anorexia Nervosa),<br>GIS06(Celiac Disease)                                                                                                                                                                                                                                                                                                                                                                                                                                     |
|                                     | 261 Nutritional marasmus                                              |                                                                                                                                                                                                                                                                                                                                                                                                                                                                                                                                                                                            |
|                                     | 262 Other severe protein-calorie malnutrition                         |                                                                                                                                                                                                                                                                                                                                                                                                                                                                                                                                                                                            |
|                                     | 268.0 Rickets, active                                                 |                                                                                                                                                                                                                                                                                                                                                                                                                                                                                                                                                                                            |
|                                     | 268.1 Rickets, late effect                                            |                                                                                                                                                                                                                                                                                                                                                                                                                                                                                                                                                                                            |
| <b>Failure to thrive</b>            | 783.4 Lack of expected normal physiological development in childhood  |                                                                                                                                                                                                                                                                                                                                                                                                                                                                                                                                                                                            |

|                                    |                                                                                           |                                                                                                                                                                                                                                                                                                                                                                                                                                                                                                                                                                                                                                                                                                                                                                                                                                                                                                                                                                                                                                                                                                                                                                                                                                                                                                                                                                                                                                                                                   |
|------------------------------------|-------------------------------------------------------------------------------------------|-----------------------------------------------------------------------------------------------------------------------------------------------------------------------------------------------------------------------------------------------------------------------------------------------------------------------------------------------------------------------------------------------------------------------------------------------------------------------------------------------------------------------------------------------------------------------------------------------------------------------------------------------------------------------------------------------------------------------------------------------------------------------------------------------------------------------------------------------------------------------------------------------------------------------------------------------------------------------------------------------------------------------------------------------------------------------------------------------------------------------------------------------------------------------------------------------------------------------------------------------------------------------------------------------------------------------------------------------------------------------------------------------------------------------------------------------------------------------------------|
| <b>Dental conditions</b>           | 521 Diseases of hard tissues of teeth                                                     | DEN02(Dental Disease), DEN04 (Gingival and Periodontal Disease), DEN81(Other Disorders of Oral Cavity)                                                                                                                                                                                                                                                                                                                                                                                                                                                                                                                                                                                                                                                                                                                                                                                                                                                                                                                                                                                                                                                                                                                                                                                                                                                                                                                                                                            |
|                                    | 522 Diseases of pulp and periapical tissues                                               |                                                                                                                                                                                                                                                                                                                                                                                                                                                                                                                                                                                                                                                                                                                                                                                                                                                                                                                                                                                                                                                                                                                                                                                                                                                                                                                                                                                                                                                                                   |
|                                    | 523 Gingival and periodontal diseases                                                     |                                                                                                                                                                                                                                                                                                                                                                                                                                                                                                                                                                                                                                                                                                                                                                                                                                                                                                                                                                                                                                                                                                                                                                                                                                                                                                                                                                                                                                                                                   |
|                                    | 525 Other diseases and conditions of the teeth and supporting structures                  |                                                                                                                                                                                                                                                                                                                                                                                                                                                                                                                                                                                                                                                                                                                                                                                                                                                                                                                                                                                                                                                                                                                                                                                                                                                                                                                                                                                                                                                                                   |
|                                    | 528 Diseases of the oral soft tissues, excluding lesions specific for gingiva and tongue  |                                                                                                                                                                                                                                                                                                                                                                                                                                                                                                                                                                                                                                                                                                                                                                                                                                                                                                                                                                                                                                                                                                                                                                                                                                                                                                                                                                                                                                                                                   |
| <b>Pelvic inflammatory disease</b> | 614 Inflammatory disease of ovary, fallopian tube, pelvic cellular tissue, and peritoneum | GYN28 (Pelvic Inflammatory Disease), INF04(Chlamydial Infection Except Trachoma or Pneumonia)                                                                                                                                                                                                                                                                                                                                                                                                                                                                                                                                                                                                                                                                                                                                                                                                                                                                                                                                                                                                                                                                                                                                                                                                                                                                                                                                                                                     |
| <b>Hypoglycemia</b>                | 251.2 Hypoglycemia, unspecified                                                           | END08(Hypoglycemia)                                                                                                                                                                                                                                                                                                                                                                                                                                                                                                                                                                                                                                                                                                                                                                                                                                                                                                                                                                                                                                                                                                                                                                                                                                                                                                                                                                                                                                                               |
|                                    | 251.0 Hypoglycemic coma                                                                   |                                                                                                                                                                                                                                                                                                                                                                                                                                                                                                                                                                                                                                                                                                                                                                                                                                                                                                                                                                                                                                                                                                                                                                                                                                                                                                                                                                                                                                                                                   |
|                                    | 251.1 Other specified hypoglycemia                                                        |                                                                                                                                                                                                                                                                                                                                                                                                                                                                                                                                                                                                                                                                                                                                                                                                                                                                                                                                                                                                                                                                                                                                                                                                                                                                                                                                                                                                                                                                                   |
|                                    | 775.0 Syndrome of "infant of a diabetic mother"                                           |                                                                                                                                                                                                                                                                                                                                                                                                                                                                                                                                                                                                                                                                                                                                                                                                                                                                                                                                                                                                                                                                                                                                                                                                                                                                                                                                                                                                                                                                                   |
| <b>Appendicitis (stage 2 or 3)</b> |                                                                                           | NA                                                                                                                                                                                                                                                                                                                                                                                                                                                                                                                                                                                                                                                                                                                                                                                                                                                                                                                                                                                                                                                                                                                                                                                                                                                                                                                                                                                                                                                                                |
| <b>Congenital Syphilis</b>         | 090.9 Congenital syphilis, unspecified                                                    | PED30 (Syphilis: Congenital)                                                                                                                                                                                                                                                                                                                                                                                                                                                                                                                                                                                                                                                                                                                                                                                                                                                                                                                                                                                                                                                                                                                                                                                                                                                                                                                                                                                                                                                      |
| <b>Cardiovascular disease</b>      | 428 Heart failure                                                                         | CVS05(Aortic Stenosis), CVS07(Cardiomyopathies), CVS09(Congestive Heart Failure), CVS10(Coronary Artery Disease Prior Coronary Revascularization), CVS11(Coronary Artery Disease w/o Prior Coronary Revascularization), CVS13(Essential Hypertension, CVS16 Mitral Stenosis), CVS14(Infective Endocarditis), CVS15(Mitral Regurgitation), CVS16(Mitral Stenosis), CVS18(Pericarditis: Chronic), CVS19(Pericarditis: Viral or Traumatic) , CVS83(Other Cardiac Conditions), END07(Hyperthyroidism), END09(Hypothyroidism), END15(Neoplasm: Pheochromocytoma), END16(Primary Amyloidosis), GEN01(Down's Syndrome), HEM03(Anemia: Folic Acid Deficiency), HEM04(Anemia: Hemolytic, HEM05 Anemia: Iron Deficiency), HEM06(Anemia: Sickle Cell, HEM07(Anemia: Thalassemia), HEM08(Anemia: Vitamin B-12 Deficiency), HEM34(Neoplasm, Malignant: Multiple Myeloma), HEM35(Neoplasm, Malignant: Waldenstrom's Macroglobulinemia), HEM36(Polycythemia Vera), HEP12(Pancreatitis, INF23 Rheumatic Fever), INF27(Syphilis: Acquired), MUS32(Muscular Dystrophy), MUS39(Progressive Systemic Sclerosis), MUS40(Rheumatoid Arthritis), PED02(Anomaly: Atrial Septal Defect), PED10(Anomaly: Other Congenital Heart Disease), PED11(Anomaly: Pulmonary Valve Stenosis), PED12(Anomaly: Tetralogy of Fallot), PED14(Anomaly: Transposition of the Great Arteries), PED15(Anomaly: Ventricular Septal Defects), PSY05(Drug Abuse, Dependence, Intoxication: Alcohol), RES15(Pneumonia: Bacterial) |
| <b>Trauma (Head Injury)</b>        |                                                                                           | NA                                                                                                                                                                                                                                                                                                                                                                                                                                                                                                                                                                                                                                                                                                                                                                                                                                                                                                                                                                                                                                                                                                                                                                                                                                                                                                                                                                                                                                                                                |

|                                                      |                                                          |                         |
|------------------------------------------------------|----------------------------------------------------------|-------------------------|
| <b>Rheumatic fever</b>                               | 390 Rheumatic fever without mention of heart involvement | INF23 (Rheumatic fever) |
|                                                      | 391 Rheumatic fever with heart involvement               |                         |
| <b>Monotropic hormone deficiency</b>                 |                                                          | NA                      |
| <b>Foreign Body: Nasopharynx, Throat or Bronchus</b> |                                                          | NA                      |
| <b>Gastritis</b>                                     |                                                          | NA                      |
