# Supplementary material for: Predicting risk of hospitalisation: a retrospective population-based analysis in a paediatric population in Emilia-Romagna, Italy
Source: PubMed Central journal article supplement — BMJ Open. 2018 May 5;8(5):e019454. doi: 10.1136/bmjopen-2017-019454 (PMC5942467; doi:10.1136/bmjopen-2017-019454), 2018-05-05
Supplement: bmjopen-2017-019454supp003.pdf [file bmjopen-2017-019454supp003.pdf]

### Appendix 3. Regression coefficients and significance levels

#### Male 1-2 years old

| Variable                                                             | Coefficient | P-value |
|----------------------------------------------------------------------|-------------|---------|
| Intercept                                                            | -4.4619     | <.0001  |
| Age at end of 2012                                                   | -0.1783     | 0.013   |
| Number of ER visits labeled as 'C: Critical': 1+                     | 0.6582      | 0.3476  |
| Number of ER visits labeled as 'A: Acute': 1                         | 0.4812      | 0.0001  |
| Number of ER visits labeled as 'A: Acute': 2+                        | 0.6205      | 0.0099  |
| Number of ER visits labeled as 'U: Urgent but could be deferred': 1  | 0.2002      | 0.02    |
| Number of ER visits labeled as 'U: Urgent but could be deferred': 2+ | 0.4258      | <.0001  |
| Number of ER visits labeled as 'N: Not Urgent': 1+                   | 0.255       | 0.003   |
| Cancer (specialty visit)                                             | 0.5055      | 0.2369  |
| Cancer (hospital admission)                                          | 1.3543      | 0.013   |
| Cardiovascular (drug use)                                            | 1.5456      | 0.008   |
| Cardiovascular (hospital admission)                                  | 0.3149      | 0.3629  |
| Skin (specialty visit)                                               | -0.0047     | 0.9725  |
| Dental Conditions (hospital admission)                               | -0.7102     | 0.3781  |
| Endocrine (specialty visit)                                          | 1.3936      | <.0001  |
| Endocrine (hospital admission or drug use)                           | 0.8038      | 0.0182  |
| Ear, Nose, Throat (specialty visit)                                  | 0.5473      | <.0001  |
| Ear, Nose, Throat (hospital admission)                               | 0.0494      | 0.839   |
| Eye (hospital admission)                                             | -0.2042     | 0.728   |
| Genetic Conditions (hospital admission)                              | -0.285      | 0.6631  |
| Gastrointestinal (specialty visit)                                   | 0.3153      | 0.2036  |
| Gastrointestinal (hospital admission with primary diagnosis)         | 0.3776      | 0.086   |
| Gastrointestinal (hospital admission with secondary diagnosis)       | 0.0525      | 0.8635  |
| Genitourinary (specialty visit)                                      | -0.2778     | 0.3841  |
| Genitourinary (hospital admission)                                   | 0.5299      | 0.0697  |
| Hematological (hospital admission)                                   | 0.7983      | 0.0046  |
| Hepatobiliary (hospital admission)                                   | 0.4004      | 0.5696  |
| Immunologic Disease (hospital admission)                             | 1.0591      | 0.1003  |
| Infectious Disease (hospital admission)                              | 0.6027      | 0.0406  |
| Male Genital (hospital admission)                                    | -0.1114     | 0.8129  |
| Musculoskeletal (hospital admission)                                 | 0.3921      | 0.2235  |
| Neurologic Diseases (drug use)                                       | 0.3671      | 0.4453  |
| Neurologic Diseases (hospital admission)                             | 0.7566      | 0.0106  |
| Nutrition (hospital admission)                                       | -0.0472     | 0.9119  |
| Other Conditions (hospital admission)                                | 0.8184      | 0.0002  |
| Pediatric medical specialty visit                                    | 0.4803      | 0.0005  |
| Neonatal Conditions (hospital admission)                             | -0.0838     | 0.8757  |
| Inappropriate Rx                                                     | -0.0338     | 0.8686  |
| Psychological (hospital admission)                                   | 0.2778      | 0.5749  |

|                                                             |         |        |
|-------------------------------------------------------------|---------|--------|
| Respiratory (specialty visit)                               | 0.2825  | 0.4175 |
| Respiratory (drug use)                                      | -0.095  | 0.4871 |
| Respiratory (hospital admission)                            | 0.3919  | 0.0211 |
| Antibiotics Usage (number of Rx): 1                         | 0.0662  | 0.5353 |
| Antibiotics Usage (number of Rx): 2                         | 0.2095  | 0.068  |
| Antibiotics Usage (number of Rx): 3+                        | 0.447   | <.0001 |
| Skin (hospital admission)                                   | 0.4547  | 0.2407 |
| Pediatric surgical specialty visit                          | 0.1926  | 0.187  |
| Trauma (hospital admission)                                 | 0.0413  | 0.9339 |
| Other conditions vs healthy newborns                        | 0.0793  | 0.5959 |
| Abnormal birth weight vs healthy newborns                   | 0.1125  | 0.2604 |
| Low income (exemption variables from AFT/FED and ASA)       | 0.2345  | 0.0045 |
| Disabled (exemption variables from AFT/FED and ASA)         | 0.1821  | 0.5097 |
| Immigrants                                                  | -0.0417 | 0.6379 |
| Mom: Age at delivery 24 and less                            | -0.0979 | 0.5097 |
| Mom: Age at delivery 35-39                                  | 0.0212  | 0.8208 |
| Mom: Age at delivery 40 and over                            | 0.0234  | 0.8733 |
| Mom: Age at delivery NA                                     | 0.1158  | 0.3462 |
| Mom: First delivery                                         | 0.1875  | 0.0263 |
| Mom: C-section                                              | -0.05   | 0.5649 |
| Mom: Number of hospitalizations 1 year prior to delivery 1  | 0.078   | 0.5319 |
| Mom: Number of hospitalizations 1 year prior to delivery 2+ | 0.264   | 0.2263 |
| Mom: Inappropriate prescription during pregnancy (class D)  | 0.2514  | 0.1184 |
| Mom: Inappropriate prescription during pregnancy (class X)  | -0.3009 | 0.193  |
| Mom: >=1 Rx for antibiotic during pregnancy                 | 0.0123  | 0.8801 |
| Mom: Abortion                                               | 0.115   | 0.3047 |
| Mom: Asthma                                                 | 0.1245  | 0.1754 |
| Mom: Cardiovascular disease                                 | 0.263   | 0.0161 |
| Mom: Diabetes                                               | 0.0993  | 0.6942 |
| Mom: Infection                                              | -0.3891 | 0.3948 |
| Mom: Psychological condition                                | 0.00668 | 0.9664 |
| Mom: Bacterial pneumonia                                    | -11.361 | 0.9739 |
| Mom: Hypertension                                           | -11.339 | 0.9689 |

Male 3-5 years old

| Variable                                                             | Coefficient | P-value |
|----------------------------------------------------------------------|-------------|---------|
| Intercept                                                            | -4.3908     | <.0001  |
| Age at end of 2012                                                   | -0.1851     | <.0001  |
| Number of ER visits labeled as 'C: Critical': 1+                     | -0.0642     | 0.9443  |
| Number of ER visits labeled as 'A: Acute': 1                         | 0.1502      | 0.2516  |
| Number of ER visits labeled as 'A: Acute': 2+                        | 0.2391      | 0.4166  |
| Number of ER visits labeled as 'U: Urgent but could be deferred': 1  | 0.1307      | 0.0589  |
| Number of ER visits labeled as 'U: Urgent but could be deferred': 2+ | 0.2037      | 0.0201  |
| Number of ER visits labeled as 'N: Not Urgent': 1+                   | 0.0885      | 0.272   |
| Cancer (specialty visit)                                             | -0.8693     | 0.1277  |
| Cancer (hospital admission)                                          | 2.2189      | 0.0003  |
| Cardiovascular (drug use)                                            | 0.453       | 0.4879  |
| Cardiovascular (hospital admission)                                  | -0.2452     | 0.6019  |
| Skin (specialty visit)                                               | 0.0923      | 0.3485  |
| Dental Conditions (hospital admission)                               | -0.0628     | 0.9371  |
| Endocrine (specialty visit)                                          | -0.6416     | 0.1776  |
| Endocrine (drug use)                                                 | -1.1204     | 0.1659  |
| Endocrine (hospital admission)                                       | 0.6101      | 0.2156  |
| Ear, Nose, Throat (specialty visit)                                  | 1.524       | <.0001  |
| Ear, Nose, Throat (hospital admission)                               | -0.7479     | <.0001  |
| Eye (hospital admission)                                             | -0.7131     | 0.3525  |
| Genetic Conditions (hospital admission)                              | 0.4159      | 0.5152  |
| Gastrointestinal (specialty visit)                                   | -0.157      | 0.5272  |
| Gastrointestinal (hospital admission with primary diagnosis)         | 0.933       | <.0001  |
| Gastrointestinal (hospital admission with secondary diagnosis)       | 0.00379     | 0.9928  |
| Genitourinary (specialty visit)                                      | 0.1998      | 0.5642  |
| Genitourinary (hospital admission)                                   | 0.2243      | 0.623   |
| Hematological (hospital admission)                                   | 0.2777      | 0.4688  |
| Hepatobiliary (hospital admission)                                   | 0.015       | 0.9882  |
| Immunologic Disease (hospital admission)                             | -0.5462     | 0.6782  |
| Infectious Disease (hospital admission)                              | 0.9351      | 0.0112  |
| Male Genital (hospital admission)                                    | -1.1519     | 0.0347  |
| Musculoskeletal (hospital admission)                                 | -1.1269     | 0.0187  |
| Neurologic Diseases (drug use)                                       | 0.3605      | 0.3631  |
| Neurologic Diseases (hospital admission)                             | 0.803       | 0.0021  |
| Nutrition (hospital admission)                                       | -0.3288     | 0.4881  |
| Neonatal/other condition (hospital admission)                        | 0.9366      | <.0001  |
| Pediatric medical specialty visit                                    | 0.1763      | 0.2109  |
| Inappropriate Rx                                                     | -0.1163     | 0.3507  |
| Psychological (hospital admission)                                   | -0.1213     | 0.7529  |

|                                                                         |         |        |
|-------------------------------------------------------------------------|---------|--------|
| Respiratory (specialty visit)                                           | 0.6986  | 0.0002 |
| Respiratory (drug use)                                                  | -0.0033 | 0.9767 |
| Respiratory (hospital admission)                                        | 0.6469  | 0.001  |
| Antibiotics Usage (number of Rx): 1                                     | 0.3154  | 0.0009 |
| Antibiotics Usage (number of Rx): 2                                     | 0.4605  | <.0001 |
| Antibiotics Usage (number of Rx): 3+                                    | 0.8373  | <.0001 |
| Skin (hospital admission)                                               | -0.8752 | 0.2465 |
| Pediatric surgical specialty visit                                      | 0.1381  | 0.3299 |
| Trauma (hospital admission)                                             | -12.786 | 0.9467 |
| Other conditions vs healthy newborns                                    | 0.0693  | 0.692  |
| Abnormal birth weight vs healthy newborns                               | -0.1385 | 0.1889 |
| Low income (exemption variables from AFT/FED and ASA)                   | 0.1382  | 0.0352 |
| Disabled (exemption variables from AFT/FED and ASA)                     | -0.0398 | 0.8437 |
| Immigrant                                                               | -0.1255 | 0.1239 |
| Mom: Age at delivery 24 and less                                        | 0.092   | 0.4172 |
| Mom: Age at delivery 35-39                                              | -0.0953 | 0.1981 |
| Mom: Age at delivery 40 and over                                        | -0.1726 | 0.1823 |
| Mom: Age at delivery NA                                                 | 0.00579 | 0.9547 |
| Mom: First delivery                                                     | 0.0862  | 0.2102 |
| Mom: C-section                                                          | 0.064   | 0.3488 |
| Mom: Number of hospitalizations 1 year prior to delivery 1              | 0.1719  | 0.0713 |
| Mom: Number of hospitalizations 1 year prior to delivery 2+             | 0.4186  | 0.0092 |
| Mom: Inappropriate prescription during pregnancy (class D)              | 0.345   | 0.0015 |
| Mom: Inappropriate prescription during pregnancy (class X)              | -0.1565 | 0.4248 |
| Mom: >=1 Rx for antibiotic during pregnancy                             | 0.0643  | 0.3298 |
| Mom: Abortion                                                           | 0.0611  | 0.5114 |
| Mom: Asthma                                                             | -0.067  | 0.4507 |
| Mom: Cardiovascular disease                                             | 0.0794  | 0.4534 |
| Mom: Diabetes                                                           | 0.2278  | 0.3482 |
| Mom: Infection                                                          | -0.3829 | 0.5266 |
| Mom: Psychological condition                                            | 0.0282  | 0.8502 |
| Mom: Hypertension                                                       | -12.352 | 0.9701 |
| History: Cancer (hospital admission)                                    | -0.0872 | 0.9335 |
| History: Cardiovascular (hospital admission)                            | -1.7855 | 0.0597 |
| History: Dental Conditions (hospital admission)                         | 0.1191  | 0.4171 |
| History: Endocrine (hospital admission)                                 | 0.2455  | 0.4269 |
| History: Ear, Nose, Throat (hospital admission)                         | 0.2496  | 0.2975 |
| History: Eye (hospital admission)                                       | -0.088  | 0.4598 |
| History: Genetic Conditions (hospital admission)                        | -0.1924 | 0.5286 |
| History: Gastrointestinal (hospital admission with primary diagnosis)   | -0.1531 | 0.6886 |
| History: Gastrointestinal (hospital admission with secondary diagnosis) | 0.2482  | 0.0296 |

|                                                                               |         |        |
|-------------------------------------------------------------------------------|---------|--------|
| History: Genitourinary (hospital admission)                                   | -0.0753 | 0.6449 |
| History: Hematological (hospital admission)                                   | -0.2199 | 0.3188 |
| History: Hepatobiliary (hospital admission)                                   | 0.4456  | 0.1529 |
| History: Immunologic Disease (hospital admission)                             | 0.4059  | 0.3341 |
| History: Infectious Disease (hospital admission)                              | 0.0303  | 0.8035 |
| History: Male Genital (hospital admission)                                    | -0.263  | 0.2335 |
| History: Musculoskeletal (hospital admission)                                 | -0.4993 | 0.0254 |
| History: Neurologic Diseases (hospital admission)                             | 0.2836  | 0.1162 |
| History: Nutrition (hospital admission)                                       | 0.4121  | 0.0231 |
| History: Other Conditions (hospital admission)                                | 0.4624  | 0.0793 |
| History: Neonatal Conditions (hospital admission)                             | -0.0783 | 0.5494 |
| History: Psychological (hospital admission)                                   | 0.0445  | 0.8625 |
| History: Respiratory (hospital admission)                                     | 0.0854  | 0.3347 |
| History: Skin (hospital admission)                                            | 0.0851  | 0.7052 |
| History: Trauma (hospital admission)                                          | -0.0237 | 0.9288 |
| History: Skin (specialty visit)                                               | 0.1423  | 0.0518 |
| History: Pediatric surgical specialty visit                                   | 0.00376 | 0.9665 |
| History: Gastrointestinal (specialty visit)                                   | 0.2392  | 0.1128 |
| History: Endocrine (specialty visit)                                          | 0.0858  | 0.7584 |
| History: Genitourinary (specialty visit)                                      | 0.1166  | 0.671  |
| History: Cancer (specialty visit)                                             | 0.1478  | 0.6408 |
| History: Ear, Nose, Throat (specialty visit)                                  | 0.5316  | <.0001 |
| History: Pediatric medical specialty visit                                    | 0.0864  | 0.1887 |
| History: Respiratory (specialty visit)                                        | 0.5207  | 0.0064 |
| History: Cardiovascular (drug use)                                            | 0.0362  | 0.9379 |
| History: Respiratory (drug use)                                               | -0.3478 | <.0001 |
| History: Endocrine (drug use)                                                 | 0.6752  | 0.3485 |
| History: Neurologic Diseases (drug use)                                       | 0.4141  | 0.334  |
| History: Inappropriate Rx                                                     | 0.00895 | 0.9274 |
| History: Antibiotics Usage (number of years history)                          | 0.0111  | 0.705  |
| History: Number of ER visits labeled as 'C: Critical': 1+                     | 0.6068  | 0.0612 |
| History: Number of ER visits labeled as 'A: Acute': 1                         | 0.0277  | 0.7708 |
| History: Number of ER visits labeled as 'A: Acute': 2+                        | 0.0285  | 0.8146 |
| History: Number of ER visits labeled as 'U: Urgent but could be deferred': 1  | 0.1429  | 0.0952 |
| History: Number of ER visits labeled as 'U: Urgent but could be deferred': 2+ | 0.0699  | 0.337  |
| History: Number of ER visits labeled as 'N: Not Urgent': 1+                   | -0.0249 | 0.6872 |

Male 6-13 years old

| Variable                                                             | Coefficient | P-value |
|----------------------------------------------------------------------|-------------|---------|
| Intercept                                                            | -5.0608     | <.0001  |
| Age at end of 2012                                                   | -0.0988     | <.0001  |
| Number of ER visits labeled as 'C: Critical': 1+                     | 0.5905      | 0.397   |
| Number of ER visits labeled as 'A: Acute': 1                         | 0.254       | 0.09    |
| Number of ER visits labeled as 'A: Acute': 2+                        | -0.4226     | 0.3826  |
| Number of ER visits labeled as 'U: Urgent but could be deferred': 1  | 0.1963      | 0.0093  |
| Number of ER visits labeled as 'U: Urgent but could be deferred': 2+ | 0.3353      | 0.002   |
| Number of ER visits labeled as 'N: Not Urgent': 1+                   | 0.0694      | 0.4921  |
| Cancer (specialty visit)                                             | 0.0895      | 0.8435  |
| Cancer (hospital admission)                                          | 1.0735      | 0.0669  |
| Cardiovascular (drug use)                                            | -0.0648     | 0.8959  |
| Cardiovascular (hospital admission)                                  | 0.251       | 0.5673  |
| Skin (specialty visit)                                               | -0.1038     | 0.3095  |
| Dental Conditions (hospital admission)                               | 0.6784      | 0.1429  |
| Endocrine (specialty visit)                                          | 0.5         | 0.0384  |
| Endocrine (drug use)                                                 | -0.5023     | 0.4691  |
| Endocrine (hospital admission)                                       | 0.2352      | 0.6721  |
| Ear, Nose, Throat (specialty visit)                                  | 1.3841      | <.0001  |
| Ear, Nose, Throat (hospital admission)                               | -1.0555     | 0.0003  |
| Eye (hospital admission)                                             | -0.7516     | 0.343   |
| Genetic Conditions (hospital admission)                              | -0.2224     | 0.7612  |
| Gastrointestinal (specialty visit)                                   | -0.0155     | 0.9528  |
| Gastrointestinal (hospital admission with primary diagnosis)         | 1.0092      | 0.0004  |
| Gastrointestinal (hospital admission with secondary diagnosis)       | 0.2371      | 0.5723  |
| Genitourinary (specialty visit)                                      | -0.199      | 0.5697  |
| Genitourinary (hospital admission)                                   | 0.9503      | 0.0159  |
| Hematological (hospital admission)                                   | 0.4117      | 0.2535  |
| Hepatobiliary (hospital admission)                                   | -1.0456     | 0.4125  |
| Immunologic Disease (hospital admission)                             | 0.5324      | 0.6289  |
| Infectious Disease (hospital admission)                              | 0.7537      | 0.0819  |
| Male Genital (hospital admission)                                    | -0.0609     | 0.8806  |
| Musculoskeletal (hospital admission)                                 | -0.497      | 0.1098  |
| Neurologic Diseases (drug use)                                       | 0.7414      | 0.0279  |
| Neurologic Diseases (hospital admission)                             | 0.9324      | <.0001  |
| Nutrition (hospital admission)                                       | 0.1509      | 0.7591  |
| Neonatal/other condition (hospital admission)                        | 0.4672      | 0.1678  |
| Pediatric medical specialty visit                                    | 0.0984      | 0.5306  |
| Inappropriate Rx                                                     | 0.3362      | 0.1756  |
| Psychological (hospital admission)                                   | 0.0188      | 0.9642  |

|                                                                         |         |        |
|-------------------------------------------------------------------------|---------|--------|
| Respiratory (specialty visit)                                           | 0.4092  | 0.0829 |
| Respiratory (drug use)                                                  | -0.0899 | 0.5566 |
| Respiratory (hospital admission)                                        | 0.6178  | 0.0156 |
| Antibiotics Usage (number of Rx): 1                                     | 0.1123  | 0.1765 |
| Antibiotics Usage (number of Rx): 2                                     | 0.2957  | 0.0022 |
| Antibiotics Usage (number of Rx): 3+                                    | 0.6045  | <.0001 |
| Skin (hospital admission)                                               | 0.3592  | 0.4646 |
| Pediatric surgical specialty visit                                      | -0.2561 | 0.1962 |
| Trauma (hospital admission)                                             | 0.2288  | 0.6719 |
| Low income (exemption variables from AFT/FED and ASA)                   | 0.1108  | 0.0876 |
| Disabled (exemption variables from AFT/FED and ASA)                     | 0.0562  | 0.7407 |
| Immigrant                                                               | 0.1941  | 0.0171 |
| History: Cancer (hospital admission)                                    | -0.1893 | 0.7004 |
| History: Cardiovascular (hospital admission)                            | -0.331  | 0.2351 |
| History: Dental Conditions (hospital admission)                         | 0.0863  | 0.7781 |
| History: Endocrine (hospital admission)                                 | 0.1744  | 0.549  |
| History: Ear, Nose, Throat (hospital admission)                         | -0.0818 | 0.4303 |
| History: Eye (hospital admission)                                       | -0.0877 | 0.7598 |
| History: Genetic Conditions (hospital admission)                        | 0.2786  | 0.3979 |
| History: Gastrointestinal (hospital admission with primary diagnosis)   | 0.0912  | 0.5373 |
| History: Gastrointestinal (hospital admission with secondary diagnosis) | -0.2858 | 0.2282 |
| History: Genitourinary (hospital admission)                             | 0.1141  | 0.6252 |
| History: Hematological (hospital admission)                             | 0.2059  | 0.3073 |
| History: Hepatobiliary (hospital admission)                             | 0.7768  | 0.0281 |
| History: Immunologic Disease (hospital admission)                       | -0.7195 | 0.3302 |
| History: Infectious Disease (hospital admission)                        | 0.1183  | 0.6089 |
| History: Male Genital (hospital admission)                              | -0.192  | 0.287  |
| History: Musculoskeletal (hospital admission)                           | 0.1894  | 0.1981 |
| History: Neurologic Diseases (hospital admission)                       | 0.5886  | 0.0002 |
| History: Nutrition (hospital admission)                                 | 0.2161  | 0.3529 |
| History: Other Conditions (hospital admission)                          | 0.3105  | 0.2424 |
| History: Neonatal Conditions (hospital admission)                       | -0.3908 | 0.6064 |
| History: Psychological (hospital admission)                             | 0.0745  | 0.7265 |
| History: Respiratory (hospital admission)                               | 0.3742  | 0.0029 |
| History: Skin (hospital admission)                                      | 0.1594  | 0.5364 |
| History: Trauma (hospital admission)                                    | -0.2875 | 0.3379 |
| History: Skin (specialty visit)                                         | 0.00041 | 0.9953 |
| History: Pediatric surgical specialty visit                             | 0.0781  | 0.3987 |
| History: Gastrointestinal (specialty visit)                             | -0.1624 | 0.4098 |
| History: Endocrine (specialty visit)                                    | -0.1416 | 0.5324 |
| History: Genitourinary (specialty visit)                                | 0.1667  | 0.5171 |

---

|                                                                               |         |        |
|-------------------------------------------------------------------------------|---------|--------|
| History: Cancer (specialty visit)                                             | 0.5712  | 0.0242 |
| History: Ear, Nose, Throat (specialty visit)                                  | 0.3662  | <.0001 |
| History: Pediatric medical specialty visit                                    | 0.1406  | 0.0412 |
| History: Respiratory (specialty visit)                                        | 0.2227  | 0.2056 |
| History: Cardiovascular (drug use)                                            | 0.4739  | 0.2013 |
| History: Respiratory (drug use)                                               | -0.1722 | 0.0587 |
| History: Endocrine (drug use)                                                 | 0.1974  | 0.7629 |
| History: Neurologic Diseases (drug use)                                       | 0.0465  | 0.8891 |
| History: Inappropriate Rx                                                     | -0.0067 | 0.9478 |
| History: Antibiotics Usage (number of years history)                          | 0.0642  | 0.0063 |
| History: Number of ER visits labeled as 'C: Critical': 1+                     | -0.113  | 0.8007 |
| History: Number of ER visits labeled as 'A: Acute': 1                         | -0.1029 | 0.3904 |
| History: Number of ER visits labeled as 'A: Acute': 2+                        | 0.0835  | 0.5636 |
| History: Number of ER visits labeled as 'U: Urgent but could be deferred': 1  | 0.1123  | 0.1878 |
| History: Number of ER visits labeled as 'U: Urgent but could be deferred': 2+ | 0.1706  | 0.019  |
| History: Number of ER visits labeled as 'N: Not Urgent': 1+                   | 0.0356  | 0.6004 |

---



Female 1-2 years old

| Variable                                                             | Coefficient | P-value |
|----------------------------------------------------------------------|-------------|---------|
| Intercept                                                            | -4.5571     | <.0001  |
| Age at end of 2012                                                   | -0.2066     | 0.0083  |
| Number of ER visits labeled as 'C: Critical': 1+                     | 0.9244      | 0.1671  |
| Number of ER visits labeled as 'A: Acute': 1                         | 0.1969      | 0.2132  |
| Number of ER visits labeled as 'A: Acute': 2+                        | 0.7359      | 0.0083  |
| Number of ER visits labeled as 'U: Urgent but could be deferred': 1  | 0.4261      | <.0001  |
| Number of ER visits labeled as 'U: Urgent but could be deferred': 2+ | 0.4671      | <.0001  |
| Number of ER visits labeled as 'N: Not Urgent': 1+                   | 0.0731      | 0.4675  |
| Cancer (specialty visit)                                             | -0.1589     | 0.8328  |
| Cancer (hospital admission)                                          | 2.161       | 0.0004  |
| Cardiovascular (drug use)                                            | 0.5362      | 0.4646  |
| Cardiovascular (hospital admission)                                  | 0.8576      | 0.0182  |
| Skin (specialty visit)                                               | 0.184       | 0.1983  |
| Dental Conditions (hospital admission)                               | -0.9622     | 0.3726  |
| Endocrine (specialty visit)                                          | -0.3798     | 0.5293  |
| Endocrine (hospital admission or drug use)                           | 0.3949      | 0.3608  |
| Ear, Nose, Throat (specialty visit)                                  | 0.6081      | 0.0002  |
| Ear, Nose, Throat (hospital admission)                               | 0.4674      | 0.08    |
| Eye (hospital admission)                                             | 0.431       | 0.4151  |
| Genetic Conditions (hospital admission)                              | 1.0638      | 0.074   |
| Gastrointestinal (specialty visit)                                   | -0.1407     | 0.6559  |
| Gastrointestinal (hospital admission with primary diagnosis)         | 0.3972      | 0.1327  |
| Gastrointestinal (hospital admission with secondary diagnosis)       | 0.2011      | 0.5735  |
| Genitourinary (specialty visit)                                      | 0.0847      | 0.8286  |
| Genitourinary (hospital admission)                                   | 0.0645      | 0.891   |
| OB/GYN (hospital admission)                                          | -11.007     | 0.9775  |
| Hematological (hospital admission)                                   | -0.1244     | 0.7917  |
| Hepatobiliary (hospital admission)                                   | -11.698     | 0.9635  |
| Infectious Disease (hospital admission)                              | 0.5415      | 0.1206  |
| Musculoskeletal (hospital admission)                                 | 0.3153      | 0.3954  |
| Neurologic Diseases (drug use)                                       | 1.9836      | <.0001  |
| Neurologic Diseases (hospital admission)                             | -0.0008     | 0.9983  |
| Nutrition (hospital admission)                                       | 0.4527      | 0.2304  |
| Other Conditions (hospital admission)                                | 0.694       | 0.0125  |
| Pediatric medical specialty visit                                    | 0.4988      | 0.0017  |
| Neonatal Conditions (hospital admission)                             | -0.1669     | 0.7809  |
| Inappropriate Rx                                                     | 0.2409      | 0.2714  |
| Psychological (hospital admission)                                   | 0.7913      | 0.1063  |
| Respiratory (specialty visit)                                        | 0.0595      | 0.9006  |

---

|                                                             |         |        |
|-------------------------------------------------------------|---------|--------|
| Respiratory (drug use)                                      | 0.1825  | 0.2547 |
| Respiratory (hospital admission)                            | 0.5431  | 0.0032 |
| Antibiotics Usage (number of Rx): 1                         | 0.1048  | 0.3403 |
| Antibiotics Usage (number of Rx): 2                         | 0.3254  | 0.0059 |
| Antibiotics Usage (number of Rx): 3+                        | 0.2723  | 0.0176 |
| Skin (hospital admission)                                   | 0.5242  | 0.2614 |
| Pediatric surgical specialty visit                          | 0.0184  | 0.9507 |
| Trauma (hospital admission)                                 | -1.3538 | 0.2004 |
| Other conditions vs healthy newborns                        | 0.3338  | 0.0187 |
| Abnormal birth weight vs healthy newborns                   | -0.1441 | 0.2722 |
| Low income (exemption variables from AFT/FED and ASA)       | 0.1929  | 0.0307 |
| Disabled (exemption variables from AFT/FED and ASA)         | 0.2458  | 0.3869 |
| Immigrant                                                   | 0.1709  | 0.068  |
| Mom: Age at delivery 24 and less                            | -0.0148 | 0.9227 |
| Mom: Age at delivery 35-39                                  | -0.0742 | 0.4664 |
| Mom: Age at delivery 40 and over                            | -0.1103 | 0.502  |
| Mom: Age at delivery NA                                     | 0.091   | 0.503  |
| Mom: First delivery                                         | 0.2184  | 0.0176 |
| Mom: C-section                                              | 0.1219  | 0.1914 |
| Mom: Number of hospitalizations 1 year prior to delivery 1  | 0.0709  | 0.6003 |
| Mom: Number of hospitalizations 1 year prior to delivery 2+ | 0.2905  | 0.1941 |
| Mom: Inappropriate prescription during pregnancy (class D)  | -0.1674 | 0.4037 |
| Mom: Inappropriate prescription during pregnancy (class X)  | 0.086   | 0.6881 |
| Mom: >=1 Rx for antibiotic during pregnancy                 | 0.0725  | 0.4081 |
| Mom: Abortion                                               | 0.1205  | 0.3247 |
| Mom: Asthma                                                 | 0.2316  | 0.0176 |
| Mom: Cardiovascular disease                                 | -0.1599 | 0.2254 |
| Mom: Diabetes                                               | 0.4683  | 0.0481 |
| Mom: Infection                                              | 0.4508  | 0.1694 |
| Mom: Psychological condition                                | 0.3314  | 0.0323 |
| Mom: Bacterial pneumonia                                    | 0.5788  | 0.4408 |
| Mom: Hypertension                                           | 0.6761  | 0.5213 |

---

Female 3-5 years old

| Variable                                                             | Coefficient | P-value |
|----------------------------------------------------------------------|-------------|---------|
| Intercept                                                            | -4.6056     | <.0001  |
| Age at end of 2012                                                   | -0.2234     | <.0001  |
| Number of ER visits labeled as 'C: Critical': 1+                     | 1.5291      | 0.0242  |
| Number of ER visits labeled as 'A: Acute': 1                         | 0.2541      | 0.1171  |
| Number of ER visits labeled as 'A: Acute': 2+                        | 0.5921      | 0.0611  |
| Number of ER visits labeled as 'U: Urgent but could be deferred': 1  | 0.1159      | 0.1775  |
| Number of ER visits labeled as 'U: Urgent but could be deferred': 2+ | 0.3232      | 0.0037  |
| Number of ER visits labeled as 'N: Not Urgent': 1+                   | 0.0931      | 0.3538  |
| Cancer (specialty visit)                                             | -0.7706     | 0.35    |
| Cancer (hospital admission)                                          | -0.1399     | 0.9057  |
| Cardiovascular (drug use)                                            | -0.3416     | 0.7265  |
| Cardiovascular (hospital admission)                                  | 0.4549      | 0.3553  |
| Skin (specialty visit)                                               | -0.1928     | 0.144   |
| Dental Conditions (hospital admission)                               | 0.3988      | 0.579   |
| Endocrine (specialty visit)                                          | 0.481       | 0.2104  |
| Endocrine (drug use)                                                 | 0.1423      | 0.8601  |
| Endocrine (hospital admission)                                       | 0.6761      | 0.1341  |
| Ear, Nose, Throat (specialty visit)                                  | 1.5774      | <.0001  |
| Ear, Nose, Throat (hospital admission)                               | -0.3541     | 0.1076  |
| Eye (hospital admission)                                             | -0.5433     | 0.5958  |
| Genetic Conditions (hospital admission)                              | -0.7183     | 0.3049  |
| Gastrointestinal (specialty visit)                                   | -0.1286     | 0.6569  |
| Gastrointestinal (hospital admission with primary diagnosis)         | 0.4361      | 0.1608  |
| Gastrointestinal (hospital admission with secondary diagnosis)       | -0.1194     | 0.7893  |
| Genitourinary (specialty visit)                                      | -0.5411     | 0.3296  |
| Genitourinary (hospital admission)                                   | 2.1019      | <.0001  |
| OB/GYN (hospital admission)                                          | -12.569     | 0.9572  |
| Hematological (hospital admission)                                   | 0.0931      | 0.8231  |
| Hepatobiliary (hospital admission)                                   | -0.7794     | 0.5574  |
| Immunologic Disease (hospital admission)                             | -0.6438     | 0.5935  |
| Infectious Disease (hospital admission)                              | 0.8241      | 0.0627  |
| Musculoskeletal (hospital admission)                                 | 0.1936      | 0.6165  |
| Neurologic Diseases (drug use)                                       | 0.1575      | 0.7742  |
| Neurologic Diseases (hospital admission)                             | 0.5916      | 0.0909  |
| Nutrition (hospital admission)                                       | 0.7261      | 0.092   |
| Neonatal/other condition (hospital admission)                        | 0.7359      | 0.024   |
| Pediatric medical specialty visit                                    | 0.1741      | 0.3278  |
| Inappropriate Rx                                                     | 0.1276      | 0.415   |
| Psychological (hospital admission)                                   | -0.911      | 0.2026  |

|                                                                       |         |        |
|-----------------------------------------------------------------------|---------|--------|
| Respiratory (specialty visit)                                         | 0.7151  | 0.0078 |
| Respiratory (drug use)                                                | -0.2092 | 0.1685 |
| Respiratory (hospital admission)                                      | 0.9109  | <.0001 |
| Antibiotics Usage (number of Rx): 1                                   | 0.00781 | 0.9441 |
| Antibiotics Usage (number of Rx): 2                                   | 0.2729  | 0.0175 |
| Antibiotics Usage (number of Rx): 3+                                  | 0.5587  | <.0001 |
| Skin (hospital admission)                                             | 0.4143  | 0.5171 |
| Pediatric surgical specialty visit                                    | -0.3071 | 0.417  |
| Trauma (hospital admission)                                           | 0.6426  | 0.2586 |
| Other conditions vs healthy newborns                                  | -0.0286 | 0.8313 |
| Abnormal birth weight vs healthy newborns                             | 0.0403  | 0.8428 |
| Low income (exemption variables from AFT/FED and ASA)                 | 0.1281  | 0.1019 |
| Disabled (exemption variables from AFT/FED and ASA)                   | -0.2122 | 0.4469 |
| Immigrant                                                             | -0.1857 | 0.058  |
| Mom: Age at delivery 24 and less                                      | 0.4048  | 0.0012 |
| Mom: Age at delivery 35-39                                            | 0.0281  | 0.7534 |
| Mom: Age at delivery 40 and over                                      | -0.1245 | 0.4175 |
| Mom: Age at delivery NA                                               | 0.3277  | 0.0081 |
| Mom: First delivery                                                   | 0.2424  | 0.0043 |
| Mom: C-section                                                        | 0.0588  | 0.4802 |
| Mom: Number of hospitalizations 1 year prior to delivery 1            | 0.1992  | 0.0751 |
| Mom: Number of hospitalizations 1 year prior to delivery 2+           | 0.1744  | 0.3781 |
| Mom: Inappropriate prescription during pregnancy (class D)            | 0.00365 | 0.9796 |
| Mom: Inappropriate prescription during pregnancy (class X)            | -0.18   | 0.4421 |
| Mom: >=1 Rx for antibiotic during pregnancy                           | 0.1996  | 0.0109 |
| Mom: Abortion                                                         | 0.0806  | 0.4681 |
| Mom: Asthma                                                           | 0.03    | 0.7731 |
| Mom: Cardiovascular disease                                           | 0.0892  | 0.4937 |
| Mom: Diabetes                                                         | 0.3871  | 0.1656 |
| Mom: Infection                                                        | 0.0938  | 0.8747 |
| Mom: Psychological condition                                          | 0.1887  | 0.2588 |
| Mom: Bacterial Pneumonia                                              | -1.0059 | 0.468  |
| Mom: Hypertension                                                     | 0.9258  | 0.2283 |
| History: Cancer (hospital admission)                                  | -0.7613 | 0.4968 |
| History: Cardiovascular (hospital admission)                          | -0.1357 | 0.4844 |
| History: Dental Conditions (hospital admission)                       | -0.0641 | 0.8721 |
| History: Endocrine (hospital admission)                               | -0.321  | 0.3353 |
| History: Ear, Nose, Throat (hospital admission)                       | 0.1229  | 0.4029 |
| History: Eye (hospital admission)                                     | -0.0508 | 0.8818 |
| History: Genetic Conditions (hospital admission)                      | 0.799   | 0.0191 |
| History: Gastrointestinal (hospital admission with primary diagnosis) | 0.1729  | 0.2373 |

|                                                                               |         |        |
|-------------------------------------------------------------------------------|---------|--------|
| History: Gastrointestinal (hospital admission with secondary diagnosis)       | -0.1618 | 0.4496 |
| History: Genitourinary (hospital admission)                                   | 0.1015  | 0.677  |
| History: OB/GYN (hospital admission)                                          | -0.0352 | 0.9506 |
| History: Hematological (hospital admission)                                   | 0.3412  | 0.1549 |
| History: Hepatobiliary (hospital admission)                                   | 0.5836  | 0.1771 |
| History: Immunologic Disease (hospital admission)                             | 0.1294  | 0.815  |
| History: Infectious Disease (hospital admission)                              | -0.3508 | 0.0383 |
| History: Musculoskeletal (hospital admission)                                 | 0.1377  | 0.5135 |
| History: Neurologic Diseases (hospital admission)                             | 0.1388  | 0.5723 |
| History: Nutrition (hospital admission)                                       | 0.1641  | 0.4831 |
| History: Other Conditions (hospital admission)                                | 0.6846  | 0.0305 |
| History: Neonatal Conditions (hospital admission)                             | 0.1031  | 0.5163 |
| History: Psychological (hospital admission)                                   | -0.3948 | 0.2789 |
| History: Respiratory (hospital admission)                                     | 0.2487  | 0.0197 |
| History: Skin (hospital admission)                                            | 0.1305  | 0.5923 |
| History: Trauma (hospital admission)                                          | 0.6773  | 0.0161 |
| History: Skin (specialty visit)                                               | 0.1008  | 0.2576 |
| History: Pediatric surgical specialty visit                                   | -0.1367 | 0.4052 |
| History: Gastrointestinal (specialty visit)                                   | -0.0783 | 0.7024 |
| History: Endocrine (specialty visit)                                          | -0.501  | 0.1488 |
| History: Genitourinary (specialty visit)                                      | -0.4215 | 0.3296 |
| History: Cancer (specialty visit)                                             | 0.1303  | 0.736  |
| History: Ear, Nose, Throat (specialty visit)                                  | 0.5018  | <.0001 |
| History: Pediatric medical specialty visit                                    | 0.0626  | 0.4364 |
| History: Respiratory (specialty visit)                                        | -0.6453 | 0.0757 |
| History: Cardiovascular (drug use)                                            | 0.3177  | 0.5455 |
| History: Respiratory (drug use)                                               | 0.1378  | 0.1819 |
| History: Endocrine (drug use)                                                 | 0.1246  | 0.8816 |
| History: Neurologic Diseases (drug use)                                       | 1.0076  | 0.0729 |
| History: Inappropriate Rx                                                     | 0.0338  | 0.7872 |
| History: Antibiotics Usage (number of years history)                          | 0.0117  | 0.7383 |
| History: Number of ER visits labeled as 'C: Critical': 1+                     | -0.183  | 0.752  |
| History: Number of ER visits labeled as 'A: Acute': 1                         | 0.0778  | 0.5103 |
| History: Number of ER visits labeled as 'A: Acute': 2+                        | -0.1193 | 0.4529 |
| History: Number of ER visits labeled as 'U: Urgent but could be deferred': 1  | 0.0555  | 0.5856 |
| History: Number of ER visits labeled as 'U: Urgent but could be deferred': 2+ | 0.1819  | 0.031  |
| History: Number of ER visits labeled as 'N: Not Urgent': 1+                   | -0.0098 | 0.8966 |

Female 6-13 years old

| Variable                                                             | Coefficient | P-value |
|----------------------------------------------------------------------|-------------|---------|
| Intercept                                                            | -5.8784     | <.0001  |
| Age at end of 2012                                                   | -0.0548     | 0.0008  |
| Number of ER visits labeled as 'C: Critical': 1+                     | 0.5528      | 0.4286  |
| Number of ER visits labeled as 'A: Acute': 1                         | 0.5618      | 0.0007  |
| Number of ER visits labeled as 'A: Acute': 2+                        | 0.8879      | 0.0091  |
| Number of ER visits labeled as 'U: Urgent but could be deferred': 1  | 0.2361      | 0.0074  |
| Number of ER visits labeled as 'U: Urgent but could be deferred': 2+ | 0.5049      | <.0001  |
| Number of ER visits labeled as 'N: Not Urgent': 1+                   | 0.0593      | 0.6033  |
| Cancer (specialty visit)                                             | 0.8804      | 0.0421  |
| Cancer (hospital admission)                                          | 1.9472      | 0.0019  |
| Cardiovascular (drug use)                                            | 0.0531      | 0.9215  |
| Cardiovascular (hospital admission)                                  | -0.1109     | 0.8265  |
| Skin (specialty visit)                                               | -0.0202     | 0.8567  |
| Dental Conditions (hospital admission)                               | -0.789      | 0.2343  |
| Endocrine (specialty visit)                                          | -0.4513     | 0.0949  |
| Endocrine (drug use)                                                 | 0.1639      | 0.7554  |
| Endocrine (hospital admission)                                       | 0.1729      | 0.6192  |
| Ear, Nose, Throat (specialty visit)                                  | 1.5421      | <.0001  |
| Ear, Nose, Throat (hospital admission)                               | -0.467      | 0.0722  |
| Eye (hospital admission)                                             | -0.3721     | 0.604   |
| Genetic Conditions (hospital admission)                              | 1.3712      | 0.0286  |
| Gastrointestinal (specialty visit)                                   | -0.4065     | 0.1273  |
| Gastrointestinal (hospital admission with primary diagnosis)         | 0.5999      | 0.045   |
| Gastrointestinal (hospital admission with secondary diagnosis)       | 0.8453      | 0.0224  |
| Genitourinary (specialty visit)                                      | 0.0925      | 0.8232  |
| Genitourinary (hospital admission)                                   | -0.0319     | 0.9572  |
| OB/GYN (hospital admission)                                          | -10.576     | 0.9463  |
| Hematological (hospital admission)                                   | -0.0211     | 0.9641  |
| Hepatobiliary (hospital admission)                                   | 0.3693      | 0.6164  |
| Immunologic Disease (hospital admission)                             | 0.5725      | 0.4888  |
| Infectious Disease (hospital admission)                              | 0.1486      | 0.7992  |
| Musculoskeletal (hospital admission)                                 | -0.6102     | 0.0649  |
| Neurologic Diseases (drug use)                                       | 0.6316      | 0.1157  |
| Neurologic Diseases (hospital admission)                             | 1.327       | <.0001  |
| Nutrition (hospital admission)                                       | 0.3239      | 0.5243  |
| Neonatal/other condition (hospital admission)                        | 0.2169      | 0.614   |
| Pediatric medical specialty visit                                    | 0.3156      | 0.0413  |
| Inappropriate Rx                                                     | -0.1339     | 0.7061  |
| Psychological (hospital admission)                                   | -0.4714     | 0.344   |

|                                                                         |         |        |
|-------------------------------------------------------------------------|---------|--------|
| Respiratory (specialty visit)                                           | 0.0964  | 0.7649 |
| Respiratory (drug use)                                                  | -0.0021 | 0.9908 |
| Respiratory (hospital admission)                                        | 0.3228  | 0.2791 |
| Antibiotics Usage (number of Rx): 1                                     | 0.2231  | 0.0191 |
| Antibiotics Usage (number of Rx): 2                                     | 0.5496  | <.0001 |
| Antibiotics Usage (number of Rx): 3+                                    | 0.7316  | <.0001 |
| Skin (hospital admission)                                               | -0.4769 | 0.5205 |
| Pediatric surgical specialty visit                                      | 0.163   | 0.6316 |
| Trauma (hospital admission)                                             | 0.6965  | 0.2614 |
| Low income (exemption variables from AFT/FED and ASA)                   | 0.2506  | 0.0006 |
| Disabled (exemption variables from AFT/FED and ASA)                     | 0.3811  | 0.0453 |
| Immigrant                                                               | 0.0669  | 0.4837 |
| History: Cancer (hospital admission)                                    | -1.2579 | 0.0794 |
| History: Cardiovascular (hospital admission)                            | -0.5369 | 0.0971 |
| History: Dental Conditions (hospital admission)                         | 0.6569  | 0.0201 |
| History: Endocrine (hospital admission)                                 | -0.0114 | 0.9665 |
| History: Ear, Nose, Throat (hospital admission)                         | 0.1263  | 0.2948 |
| History: Eye (hospital admission)                                       | 0.1505  | 0.5917 |
| History: Genetic Conditions (hospital admission)                        | -0.2005 | 0.6414 |
| History: Gastrointestinal (hospital admission with primary diagnosis)   | 0.32    | 0.0332 |
| History: Gastrointestinal (hospital admission with secondary diagnosis) | 0.0424  | 0.8574 |
| History: Genitourinary (hospital admission)                             | -0.0075 | 0.9806 |
| History: OB/GYN (hospital admission)                                    | 0.9705  | 0.0427 |
| History: Hematological (hospital admission)                             | 0.3297  | 0.1683 |
| History: Hepatobiliary (hospital admission)                             | 0.1931  | 0.7029 |
| History: Immunologic Disease (hospital admission)                       | 0.469   | 0.2754 |
| History: Infectious Disease (hospital admission)                        | 0.0864  | 0.7466 |
| History: Musculoskeletal (hospital admission)                           | 0.3058  | 0.0805 |
| History: Neurologic Diseases (hospital admission)                       | 0.2079  | 0.3002 |
| History: Nutrition (hospital admission)                                 | -0.1424 | 0.6003 |
| History: Other Conditions (hospital admission)                          | -1.1015 | 0.0258 |
| History: Neonatal Conditions (hospital admission)                       | -0.054  | 0.9358 |
| History: Psychological (hospital admission)                             | 0.2273  | 0.3797 |
| History: Respiratory (hospital admission)                               | 0.0871  | 0.5762 |
| History: Skin (hospital admission)                                      | 0.0572  | 0.8443 |
| History: Trauma (hospital admission)                                    | 0.4149  | 0.1635 |
| History: Skin (specialty visit)                                         | -0.135  | 0.0878 |
| History: Pediatric surgical specialty visit                             | 0.011   | 0.9465 |
| History: Gastrointestinal (specialty visit)                             | 0.4319  | 0.0093 |
| History: Endocrine (specialty visit)                                    | 0.4559  | 0.0118 |
| History: Genitourinary (specialty visit)                                | -0.1484 | 0.6694 |

---

|                                                                               |         |        |
|-------------------------------------------------------------------------------|---------|--------|
| History: Cancer (specialty visit)                                             | -0.2097 | 0.604  |
| History: Ear, Nose, Throat (specialty visit)                                  | 0.3035  | <.0001 |
| History: Pediatric medical specialty visit                                    | 0.00862 | 0.9143 |
| History: Respiratory (specialty visit)                                        | -0.0033 | 0.9886 |
| History: Cardiovascular (drug use)                                            | 0.7729  | 0.0742 |
| History: Respiratory (drug use)                                               | 0.1033  | 0.3109 |
| History: Endocrine (drug use)                                                 | 0.3977  | 0.453  |
| History: Neurologic Diseases (drug use)                                       | 0.1549  | 0.7028 |
| History: Inappropriate Rx                                                     | 0.1035  | 0.3876 |
| History: Antibiotics Usage (number of years history)                          | 0.0952  | 0.0004 |
| History: Number of ER visits labeled as 'C: Critical': 1+                     | 0.7989  | 0.0396 |
| History: Number of ER visits labeled as 'A: Acute': 1                         | -0.1075 | 0.451  |
| History: Number of ER visits labeled as 'A: Acute': 2+                        | 0.3286  | 0.043  |
| History: Number of ER visits labeled as 'U: Urgent but could be deferred': 1  | 0.2086  | 0.0248 |
| History: Number of ER visits labeled as 'U: Urgent but could be deferred': 2+ | 0.1974  | 0.0158 |
| History: Number of ER visits labeled as 'N: Not Urgent': 1+                   | -0.0564 | 0.4744 |

---
